# Supplementary material for: Organocatalytic asymmetric domino sulfa-Michael–aldol reactions of 2-mercaptobenzaldehyde with α,β-unsaturated N-acylpyrazoles for the construction of thiochromane
Source: Royal Society of Chemistry journal article supplement (doi:10.1039/c2cc31891a), 2012-01-01
Supplement: c2cc31891a.pdf [file c2cc31891a.pdf]

# Organocatalytic Asymmetric Domino *sulfa*-Michael-Aldol Reactions of 2-Mercaptobenzaldehyde with $\alpha,\beta$ -Unsaturated *N*-Acylpyrazoles for the Construction of Thiochromanes

Xiu-Qin Dong,<sup>a</sup> Xin Fang,<sup>a</sup> Hai-Yan Tao,<sup>a</sup> Xiang Zhou,<sup>a</sup> and Chun-Jiang Wang<sup>\*ab</sup>

E-mail: cjwang@whu.edu.cn

## Supporting Information

### Table of Contents

|       |                                                                                                                                                                          |         |
|-------|--------------------------------------------------------------------------------------------------------------------------------------------------------------------------|---------|
| I.    | General Remarks.....                                                                                                                                                     | S2      |
| II.   | General Procedure for Asymmetric Domino <i>sulfa</i> -Michael-Aldol Reactions of<br>2-Mercaptobenzaldehyde with $\alpha,\beta$ -Unsaturated <i>N</i> -Acylpyrazoles..... | S2-15   |
| III.  | Synthetic transformation of the <i>sulfa</i> -Michael-Aldol adduct <b>3a</b> .....                                                                                       | S16     |
| IV.   | X-ray Crystal Structures of (2 <i>S</i> ,3 <i>R</i> ,4 <i>S</i> )- <b>3r</b> .....                                                                                       | S17     |
| V.    | Proposed Transition-State Model for the Asymmetric Domino<br><i>sulfa</i> -Michael-Aldol Reaction.....                                                                   | S17     |
| VI.   | References.....                                                                                                                                                          | S18     |
| VII.  | <sup>1</sup> H NMR and <sup>13</sup> C NMR Spectra.....                                                                                                                  | S19-60  |
| VIII. | HPLC Chromatograms.....                                                                                                                                                  | S61-102 |

## I. General Remarks

$^1\text{H}$  NMR spectra were recorded on a VARIAN Mercury 300 MHz spectrometer in chloroform-d. Chemical shifts are reported in ppm with the internal TMS signal at 0.0 ppm as a standard. The data are reported as (s = singlet, d = doublet, t = triplet, q = quartet, m = multiplet or unresolved, brs = broad singlet, coupling constant(s) in Hz, integration).  $^{13}\text{C}$  NMR spectra were recorded on a VARIAN Mercury 75 MHz spectrometer in chloroform-d. Chemical shifts are reported in ppm with the internal chloroform signal at 77.0 ppm as a standard. Commercially obtained reagents were used without further purification. All reactions were monitored by TLC with silica gel-coated plates. Enantiomeric ratios were determined by HPLC, using a chiralpak AS-H column, a chiralpak AD-H column, a chiralpak OD-H column, a chiralpak OJ-H column with hexane and *i*-PrOH as solvents.  $\beta$ -Aryl and  $\beta$ -alkyl  $\alpha,\beta$ -unsaturated acids and *N*-acylpyrazoles were prepared according to the literatures.<sup>1,2</sup> The racemic adducts were obtained by using racemic catalyst **II** (0.1 eq.). The absolute (2*S*,3*R*,4*S*)-configuration of **3r** was determined by X-ray crystallographic analysis of a single crystal, the other adducts were deduced on the basis of these results.

## II. General procedure for asymmetric domino *sulfa*-Michael-Aldol reactions of 2-mercaptobenzaldehyde with $\alpha,\beta$ -unsaturated *N*-acylpyrazoles catalyzed by organocatalysts (**III**)

To a vial containing 2-mercaptobenzaldehyde (0.3 mmol) and catalyst **III** (1.7 mg, 0.003 mmol) in ether (1.0 mL) was added  $\alpha,\beta$ -unsaturated *N*-acylpyrazoles (0.33 mmol) at 0°C. TLC analysis indicated completion of the reactions after about 4h. Then the reaction mixtures were concentrated *in vacuo* to obtain the crude products. The crude products were purified by flash silica gel chromatography to afford the products.

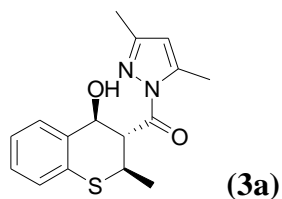

**(2S,3R,4S)-3,5-Dimethyl-pyrazol-1-yl)-(4-hydroxy-2-methyl-thiochroman-3-yl)-methanone** (Table 2, entry 1):

The title compound was prepared according to the general procedure as described above in 90% yield.  $[\alpha]_D^{25} +135.8$  (*c* 1.24, CHCl<sub>3</sub>); <sup>1</sup>H NMR (CDCl<sub>3</sub>, TMS, 300 MHz) δ 1.29-1.31 (d, *J* = 6.9 Hz, 3H), 2.21 (s, 3H), 2.61 (s, 3H), 3.80-3.88 (m, 1H), 4.22-4.35 (m, 1H), 4.96-5.00 (m, 1H), 6.03 (s, 1H), 7.02-7.18 (m, 3H), 7.65-7.67 (m, 1H); <sup>13</sup>C NMR (CDCl<sub>3</sub>, TMS, 75 MHz) δ 13.7, 14.5, 19.8, 37.2, 53.4, 71.9, 111.9, 124.5, 125.5, 126.2, 127.6, 132.6, 136.8, 144.5, 152.9, 173.7; IR (KBr) ν: 3476, 2959, 2925, 2169, 1699, 1394, 1364, 1331, 1296, 1220, 1125, 1057, 765 cm<sup>-1</sup>. The product was analyzed to determine the diastereoselectivity and enantioselectivity of the reaction: dr = 98:2, 98% ee (major diastereomer) determined by HPLC (Chiralcel AS-H, i-propanol/hexane = 10/90, flow rate 0.5 mL/min, λ = 254 nm); major diastereomer: *t*<sub>minor</sub> = 22.1 min, *t*<sub>major</sub> = 15.1 min; minor diastereomer: 14.5 min, 23.5 min.

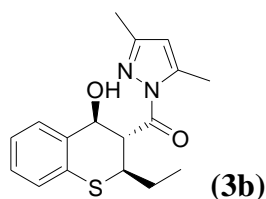

**(2S,3R,4S)-3,5-Dimethyl-pyrazol-1-yl)-(2-ethyl-4-hydroxy-thiochroman-3-yl)-methanone** (Table 2, entry 2):

The title compound was prepared according to the general procedure as described above in 88% yield.  $[\alpha]_D^{25} +128.7$  (*c* 1.26 CHCl<sub>3</sub>); <sup>1</sup>H NMR (CDCl<sub>3</sub>, TMS, 300 MHz) δ 0.94-0.99 (t, *J* = 7.2 Hz, 3H), 1.51-1.77 (m, 2H), 2.21 (s, 3H), 2.60 (s, 3H), 3.05 (brs, 1H), 3.76-3.84 (m, 1H), 4.25-4.31 (t, *J* = 10.2 Hz, 1H), 4.93-4.96 (d, *J* = 9.6 Hz, 1H), 6.02 (s, 1H), 7.16-7.19 (m, 3H), 7.63-7.66 (m, 1H); <sup>13</sup>C NMR (CDCl<sub>3</sub>, TMS, 75 MHz) δ 10.8, 13.7, 14.5, 27.6, 44.6, 52.2, 72.0, 111.8, 124.6, 125.5, 126.2, 127.5,

132.2, 137.7, 144.5, 152.9, 173.8; IR (KBr)  $\nu$ : 3464, 2965, 2927, 2166, 1700, 1588, 1437, 1396, 1361, 1318, 1261, 1219, 1200, 1125, 1037, 1019, 961, 768, 747  $\text{cm}^{-1}$ . The product was analyzed to determine the diastereoselectivity and enantioselectivity of the reaction: dr = 97:3, 96% ee (major diastereomer) determined by HPLC (Chiralcel AD-H, i-propanol/hexane = 10/90, flow rate 1.0 mL/min,  $\lambda$  = 254 nm); major diastereomer:  $t_{\text{minor}}$  = 8.1 min,  $t_{\text{major}}$  = 14.2 min; minor diastereomer: 11.8 min, 12.6 min.

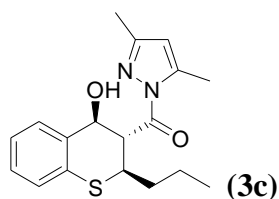

**(2S,3R,4S)-(3,5-Dimethyl-pyrazol-1-yl)-(4-hydroxy-2-propyl-thiochroman-3-yl)-methanone** (Table 2, entry 3):

The title compound was prepared according to the general procedure as described above in 91% yield.  $[\alpha]_{\text{D}}^{25} +133.8$  ( $c$  1.18  $\text{CHCl}_3$ );  $^1\text{H}$  NMR ( $\text{CDCl}_3$ , TMS, 300 MHz)  $\delta$  0.84-0.89 (t,  $J$  = 7.2 Hz, 3H), 1.25-1.67 (m, 4H), 2.21 (s, 3H), 2.61 (s, 3H), 3.81-3.89 (m, 1H), 4.24-4.31 (t,  $J$  = 10.2 Hz, 1H), 4.93-4.96 (d,  $J$  = 9.6 Hz, 1H), 6.03 (s, 1H), 7.16-7.19 (m, 3H), 7.64-7.66 (m, 1H);  $^{13}\text{C}$  NMR ( $\text{CDCl}_3$ , TMS, 75 MHz)  $\delta$  13.6, 13.7, 14.5, 19.5, 36.7, 42.8, 52.6, 72.0, 111.8, 124.6, 125.5, 126.2, 127.5, 132.2, 137.7, 144.5, 152.9, 173.8; IR (KBr)  $\nu$ : 3471, 2954, 2925, 2176, 1701, 1588, 1474, 1437, 1382, 1359, 1333, 1299, 1219, 1200, 1034, 961, 768, 750  $\text{cm}^{-1}$ . The product was analyzed to determine the diastereoselectivity and enantioselectivity of the reaction: dr = 97:3, 97% ee (major diastereomer) determined by HPLC (Chiralcel OJ-H, i-propanol/hexane = 10/90, flow rate 0.5 mL/min,  $\lambda$  = 254 nm); major diastereomer:  $t_{\text{minor}}$  = 13.2 min,  $t_{\text{major}}$  = 12.0 min; minor diastereomer: 20.3 min, 26.8 min.

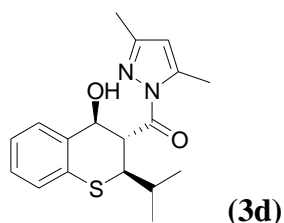

**(2S,3R,4S)-(3,5-Dimethyl-pyrazol-1-yl)-(4-hydroxy-2-isopropyl-thiochroman-3-yl)-methanone** (Table 2, entry 4):

The title compound was prepared according to the general procedure as described above in 91% yield.  $[\alpha]_D^{25} +106.1$  (*c* 1.30 CHCl<sub>3</sub>); <sup>1</sup>H NMR (CDCl<sub>3</sub>, TMS, 300 MHz)  $\delta$  0.87-0.89 (d, *J* = 6.6 Hz, 3H), 0.96-0.98 (d, *J* = 6.6 Hz, 3H), 1.90-1.98 (m, 1H), 2.21 (s, 3H), 2.60 (s, 3H), 3.06 (brs, 1H), 3.96-3.99 (m, 1H), 4.25-4.32 (t, *J* = 10.2 Hz, 1H), 4.80-4.95 (m, 1H), 6.02 (s, 1H), 7.20-7.21 (m, 3H), 7.60-7.70 (m, 1H); <sup>13</sup>C NMR (CDCl<sub>3</sub>, TMS, 75 MHz)  $\delta$  13.8, 14.6, 16.7, 20.6, 31.5, 50.0, 50.6, 72.6, 111.8, 124.7, 124.8, 126.8, 127.6, 132.7, 139.0, 144.6, 153.0, 173.9; IR (KBr)  $\nu$ : 3444, 2961, 2930, 2170, 1718, 1586, 1467, 1437, 1408, 1378, 1359, 1339, 1306, 1219, 1131, 1084, 1036, 965, 765 cm<sup>-1</sup>. The product was analyzed to determine the diastereoselectivity and enantioselectivity of the reaction: dr = 93:7, 91% ee (major diastereomer) determined by HPLC (Chiralcel AD-H, i-propanol/hexane = 10/90, flow rate 1.0 mL/min,  $\lambda$  = 254 nm); major diastereomer:  $t_{minor}$  = 8.2 min,  $t_{major}$  = 13.1 min; minor diastereomer: 10.6 min, 11.5 min.

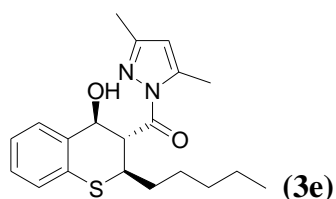

**(2S,3R,4S)-(3,5-Dimethyl-pyrazol-1-yl)-(4-hydroxy-2-pentyl-thiochroman-3-yl)-methanone** (Table 2, entry 5):

The title compound was prepared according to the general procedure as described above in 85% yield.  $[\alpha]_D^{25} +126.8$  (*c* 1.47 CHCl<sub>3</sub>); <sup>1</sup>H NMR (CDCl<sub>3</sub>, TMS, 300 MHz)  $\delta$  0.82-0.86 (t, *J* = 6.6 Hz, 3H), 1.22-1.70 (m, 8H), 2.21 (s, 3H), 2.61 (s, 3H), 3.06 (brs, 1H), 3.80-3.85 (m, 1H), 4.25-4.30 (t, *J* = 9.6 Hz, 1H), 4.93-4.97 (d, *J* = 10.5 Hz,

1H), 6.03 (s, 1H), 7.16-7.19 (m, 3H), 7.64-7.67 (m, 1H);  $^{13}\text{C}$  NMR ( $\text{CDCl}_3$ , TMS, 75 MHz)  $\delta$  13.7, 13.9, 14.5, 22.3, 25.9, 31.2, 34.5, 43.0, 52.6, 72.0, 111.8, 124.7, 125.6, 126.2, 127.5, 132.3, 137.6, 144.5, 152.9, 173.9; IR (KBr)  $\nu$ : 3474, 2955, 2929, 2857, 1708, 1587, 1566, 1469, 1436, 1383, 1361, 1339, 1302, 1261, 1224, 1201, 1130, 1087, 1057, 1037, 961, 901, 746  $\text{cm}^{-1}$ . The product was analyzed to determine the diastereoselectivity and enantioselectivity of the reaction: dr = 96:4, 97% ee (major diastereomer) determined by HPLC (Chiralcel OJ-H, i-propanol/hexane = 10/90, flow rate 0.5 mL/min,  $\lambda$  = 254 nm); major diastereomer:  $t_{\text{minor}}$  = 10.3 min,  $t_{\text{major}}$  = 9.5 min; minor diastereomer: 11.8 min, 14.8 min.

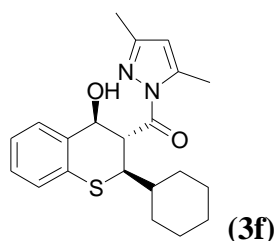

**(2S,3R,4S)-(2-Cyclohexyl-4-hydroxy-thiochroman-3-yl)-(3,5-dimethyl-pyrazol-1-yl)-methanone** (Table 2, entry 6):

The title compound was prepared according to the general procedure as described above in 91% yield.  $[\alpha]_{\text{D}}^{25} +72.5$  ( $c$  0.6  $\text{CHCl}_3$ );  $^1\text{H}$  NMR ( $\text{CDCl}_3$ , TMS, 300 MHz)  $\delta$  0.82-1.70 (m, 11H), 2.21 (s, 3H), 2.60 (s, 3H), 3.20 (brs, 1H), 3.88-3.93 (m, 1H), 4.25-4.32 (t,  $J$  = 10.2 Hz, 1H), 4.86-4.90 (d,  $J$  = 9.6 Hz, 1H), 6.02 (s, 1H), 7.18-7.28 (m, 3H), 7.61-7.65 (m, 1H);  $^{13}\text{C}$  NMR ( $\text{CDCl}_3$ , TMS, 75 MHz)  $\delta$  13.8, 14.5, 26.0, 26.1, 26.4, 27.5, 30.8, 41.9, 49.4, 50.3, 72.7, 111.7, 124.6, 125.0, 126.9, 127.6, 132.8, 139.3, 144.7, 153.0, 173.8; IR (KBr)  $\nu$ : 3421, 2925, 2852, 2166, 1718, 1586, 1558, 1435, 1408, 1379, 1362, 1324, 1306, 1220, 1128, 1087, 1057, 1037, 963, 901, 772, 750  $\text{cm}^{-1}$ . The product was analyzed to determine the diastereoselectivity and enantioselectivity of the reaction: dr = 96:4, 93% ee (major diastereomer) determined by HPLC (Chiralcel AD-H, i-propanol/hexane = 5/95, flow rate 0.25 mL/min,  $\lambda$  = 235 nm); major diastereomer:  $t_{\text{minor}}$  = 70.9 min,  $t_{\text{major}}$  = 75.7 min; minor diastereomer: 87.1 min.

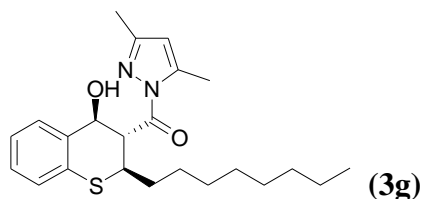

**(2S,3R,4S)-(3,5-Dimethyl-pyrazol-1-yl)-(4-hydroxy-2-octyl-thiochroman-3-yl)-methanone** (Table 2, entry 7):

The title compound was prepared according to the general procedure as described above in 89% yield.  $[\alpha]_D^{25} +105.2$  (*c* 0.76 CHCl<sub>3</sub>); <sup>1</sup>H NMR (CDCl<sub>3</sub>, TMS, 300 MHz)  $\delta$  0.84-0.88 (t, *J* = 6.9 Hz, 3H), 1.21-1.66 (m, 14H), 2.20 (s, 3H), 2.60 (s, 3H), 3.79-3.87 (m, 1H), 4.24-4.31 (t, *J* = 10.2 Hz, 1H), 4.93-4.96 (d, *J* = 10.2 Hz, 1H), 6.02 (s, 1H), 7.16-7.18 (m, 3H), 7.64-7.66 (m, 1H); <sup>13</sup>C NMR (CDCl<sub>3</sub>, TMS, 75 MHz)  $\delta$  13.9, 14.2, 14.6, 22.7, 26.3, 29.2, 29.4, 31.9, 34.7, 43.1, 52.8, 72.2, 111.9, 124.8, 125.7, 126.4, 127.7, 132.4, 137.8, 144.6, 153.0, 174.0; IR (KBr)  $\nu$ : 3493, 2952, 2921, 2853, 1712, 1586, 1563, 1472, 1383, 1356, 1262, 1037, 961, 757 cm<sup>-1</sup>. The product was analyzed to determine the diastereoselectivity and enantioselectivity of the reaction: dr = 98:2, 98% ee (major diastereomer) determined by HPLC (Chiralcel AD-H, i-propanol/hexane = 10/90, flow rate 1.0 mL/min,  $\lambda$  = 254 nm); major diastereomer:  $t_{minor}$  = 5.8 min,  $t_{major}$  = 7.7 min; minor diastereomer: 7.0 min, 9.3 min.

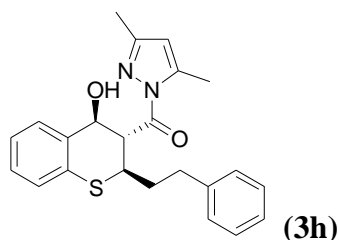

**(2S,3R,4S)-(3,5-Dimethyl-pyrazol-1-yl)-(4-hydroxy-2-phenethyl-thiochroman-3-yl)-methanone** (Table 2, entry 8):

The title compound was prepared according to the general procedure as described above in 93% yield.  $[\alpha]_D^{25} +97.5$  (*c* 1.59 CHCl<sub>3</sub>); <sup>1</sup>H NMR (CDCl<sub>3</sub>, TMS, 300 MHz)  $\delta$  1.80-1.85 (m, 1H), 1.97-2.02 (m, 1H), 2.19 (s, 3H), 2.58 (s, 3H), 2.64-2.68 (m, 1H), 2.77-2.82 (m, 1H), 3.10 (brs, 1H), 3.82-3.86 (m, 1H), 4.26-4.33 (t, *J* = 9.9 Hz, 1H), 4.94-4.98 (d, *J* = 9.9 Hz, 1H), 6.01 (s, 1H), 7.08-7.24 (m, 8H), 7.63-7.66 (m, 1H); <sup>13</sup>C

NMR (CDCl<sub>3</sub>, TMS, 75 MHz)  $\delta$  13.7, 14.5, 32.4, 36.5, 42.7, 52.7, 71.8, 111.9, 125.0, 125.5, 125.9, 126.5, 127.6, 128.3, 131.9, 137.9, 141.0, 144.5, 152.9, 173.6; IR (KBr)  $\nu$ : 3493, 2926, 2856, 1706, 1588, 1566, 1471, 1434, 1384, 1362, 1344, 1201, 1180, 1131, 1080, 1048, 996, 962, 896, 812, 751 cm<sup>-1</sup>. The product was analyzed to determine the diastereoselectivity and enantioselectivity of the reaction: dr = 94:6, 98% ee (major diastereomer) determined by HPLC (Chiralcel AS-H, i-propanol/hexane = 10/90, flow rate 0.5 mL/min,  $\lambda$  = 254 nm); major diastereomer:  $t_{minor}$  = 22.9 min,  $t_{major}$  = 16.0 min; minor diastereomer: 18.1 min, 20.0 min.

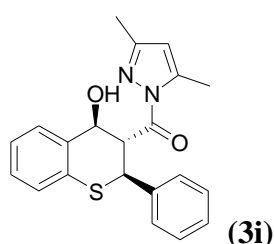

**(2*S*,3*R*,4*S*)-(3,5-Dimethyl-pyrazol-1-yl)-(4-hydroxy-2-phenyl-thiochroman-3-yl)-methanone** (Table 3, entry 1):

The title compound was prepared according to the general procedure as described above in 87% yield.  $[\alpha]_D^{25} +105.2$  (*c* 2.0 CHCl<sub>3</sub>); <sup>1</sup>H NMR (CDCl<sub>3</sub>, TMS, 300 MHz)  $\delta$  2.18 (s, 3H), 2.28 (s, 3H), 4.90-4.98 (m, 2H), 5.12-5.15 (d, *J* = 9.3 Hz, 1H), 5.86 (s, 1H), 7.13-7.26 (m, 6H), 7.34-7.36 (m, 2H), 7.72-7.75 (m, 1H); <sup>13</sup>C NMR (CDCl<sub>3</sub>, TMS, 75 MHz)  $\delta$  13.6, 14.0, 46.8, 52.3, 72.2, 111.3, 124.6, 125.0, 126.5, 127.7, 128.0, 128.2, 128.4, 133.0, 136.7, 137.7, 144.2, 152.6, 172.8; IR (KBr)  $\nu$ : 3493, 2926, 1706, 1588, 1471, 1434, 1384, 1362, 1344, 1201, 1180, 1131, 1048, 996, 962, 896, 812, 751 cm<sup>-1</sup>. The product was analyzed to determine the diastereoselectivity and enantioselectivity of the reaction: dr = 99:1, 99% ee (major diastereomer) determined by HPLC (Chiralcel OJ-H, i-propanol/hexane = 10/90, flow rate 1.0 mL/min,  $\lambda$  = 254 nm); major diastereomer:  $t_{minor}$  = 13.2 min,  $t_{major}$  = 16.9 min; minor diastereomer: 25.8 min, 30.2 min.



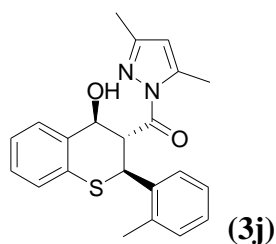

**(2S,3R,4S)-(3,5-Dimethyl-pyrazol-1-yl)-(4-hydroxy-2-*o*-tolyl-thiochroman-3-yl)-methanone** (Table 3, entry 2):

The title compound was prepared according to the general procedure as described above in 85% yield.  $[\alpha]_D^{25} +120.8$  (*c* 1.28 CHCl<sub>3</sub>); <sup>1</sup>H NMR (CDCl<sub>3</sub>, TMS, 300 MHz) δ 2.21 (s, 3H), 2.26 (s, 3H), 2.49 (s, 3H), 3.30 (brs, 1H), 5.04-5.08 (m, 1H), 5.15-5.22 (m, 2H), 5.89 (s, 1H), 7.01-7.32 (m, 7H), 7.73-7.80 (m, 1H); <sup>13</sup>C NMR (CDCl<sub>3</sub>, TMS, 75 MHz) δ 13.7, 13.9, 19.4, 42.2, 51.7, 72.6, 111.3, 124.6, 125.1, 126.2, 126.9, 127.7, 127.8, 130.5, 133.2, 135.8, 136.6, 144.2, 152.7, 173.1; IR (KBr) ν: 3421, 3061, 2926, 2360, 2342, 1718, 1586, 1489, 1465, 1437, 1384, 1361, 1338, 1301, 1262, 1218, 1161, 1130, 1037, 992, 901, 772, 747 cm<sup>-1</sup>. The product was analyzed to determine the diastereoselectivity and enantioselectivity of the reaction: dr = 98:2, 99% ee (major diastereomer) determined by HPLC (Chiralcel AD-H, *i*-propanol/hexane = 10/90, flow rate 1.0 mL/min, λ = 254 nm); major diastereomer: *t*<sub>minor</sub> = 9.1 min, *t*<sub>major</sub> = 22.1 min; minor diastereomer: 17.5 min, 18.2 min.

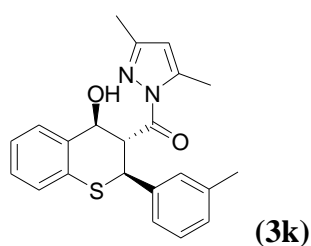

**(2S,3R,4S)-(3,5-Dimethyl-pyrazol-1-yl)-(4-hydroxy-2-*m*-tolyl-thiochroman-3-yl)-methanone** (Table 3, entry 3):

The title compound was prepared according to the general procedure as described above in 88% yield.  $[\alpha]_D^{25} +92.0$  (*c* 1.39 CHCl<sub>3</sub>); <sup>1</sup>H NMR (CDCl<sub>3</sub>, TMS, 300 MHz) δ 2.19 (s, 3H), 2.24 (s, 3H), 2.29 (s, 3H), 3.20 (brs, 1H), 4.90-4.93 (m, 2H), 5.10-5.20 (m, 1H), 5.87 (s, 1H), 6.98-7.00 (m, 1H), 7.06-7.23 (m, 6H), 7.72-7.75 (m, 1H); <sup>13</sup>C NMR (CDCl<sub>3</sub>, TMS, 75 MHz) δ 13.7, 14.0, 21.2, 46.8, 52.2, 72.2, 111.2, 124.6,

125.0, 125.1, 126.5, 127.7, 128.2, 128.8, 129.0, 133.1, 136.7, 137.5, 138.0, 144.2, 152.5, 172.9; IR (KBr)  $\nu$ : 3421, 3058, 2925, 2360, 2337, 1719, 1606, 1588, 1566, 1472, 1436, 1384, 1361, 1336, 1302, 1262, 1228, 1170, 1130, 1078, 1037, 962, 898, 787, 749  $\text{cm}^{-1}$ . The product was analyzed to determine the diastereoselectivity and enantioselectivity of the reaction: dr = 97:3, 99% ee (major diastereomer) determined by HPLC (Chiralcel AD-H, i-propanol/hexane = 10/90, flow rate 1.0 mL/min,  $\lambda$  = 254 nm); major diastereomer:  $t_{\text{minor}}$  = 10.7 min,  $t_{\text{major}}$  = 26.8 min; minor diastereomer: 21.0 min, 22.1 min.

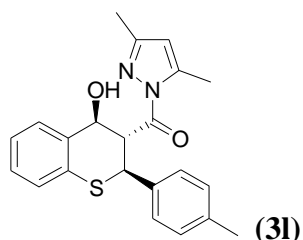

**(2*S*,3*R*,4*S*)-(3,5-Dimethyl-pyrazol-1-yl)-(4-hydroxy-2-*p*-tolyl-thiochroman-3-yl)-methanone** (Table 3, entry 4):

The title compound was prepared according to the general procedure as described above in 89% yield.  $[\alpha]_{\text{D}}^{25} +115.5$  ( $c$  1.42  $\text{CHCl}_3$ );  $^1\text{H}$  NMR ( $\text{CDCl}_3$ , TMS, 300 MHz)  $\delta$  2.19 (s, 3H), 2.26 (s, 3H), 2.31 (s, 3H), 3.20 (brs, 1H), 4.89-4.97 (m, 2H), 5.08-5.18 (m, 1H), 5.88 (s, 1H), 7.01-7.04 (m, 2H), 7.15-7.26 (m, 5H), 7.72-7.74 (m, 1H);  $^{13}\text{C}$  NMR ( $\text{CDCl}_3$ , TMS, 75 MHz)  $\delta$  13.8, 14.1, 21.1, 46.5, 52.4, 72.4, 111.4, 124.6, 125.1, 126.6, 127.8, 128.1, 129.2, 133.2, 134.9, 136.9, 137.8, 144.3, 152.7, 172.9; IR (KBr)  $\nu$ : 3426, 3050, 2924, 2852, 2164, 1719, 1588, 1512, 1437, 1411, 1379, 1361, 1309, 1261, 1037, 962, 898, 805, 749  $\text{cm}^{-1}$ . The product was analyzed to determine the diastereoselectivity and enantioselectivity of the reaction: dr = 98:2, 98% ee (major diastereomer) determined by HPLC (Chiralcel AD-H, i-propanol/hexane = 10/90, flow rate 1.0 mL/min,  $\lambda$  = 254 nm); major diastereomer:  $t_{\text{minor}}$  = 10.9 min,  $t_{\text{major}}$  = 26.0 min; minor diastereomer: 22.8 min.

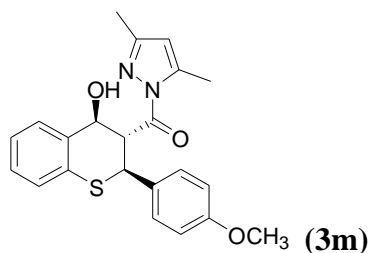

**(2S,3R,4S)-(3,5-Dimethyl-pyrazol-1-yl)-[4-hydroxy-2-(4-methoxy-phenyl)-thiochroman-3-yl]-methanone** (Table 3, entry 5):

The title compound was prepared according to the general procedure as described above in 86% yield.  $[\alpha]_D^{25} +106.1$  (*c* 1.66 CHCl<sub>3</sub>); <sup>1</sup>H NMR (CDCl<sub>3</sub>, TMS, 300 MHz) δ 2.19 (s, 3H), 2.31 (s, 3H), 3.75 (s, 3H), 4.85-4.97 (m, 2H), 5.10-5.14 (m, 1H), 5.88 (s, 1H), 6.73-6.76 (d, *J* = 8.7 Hz, 2H), 7.14-7.19 (m, 3H), 7.26-7.30 (m, 2H), 7.72-7.74 (m, 1H); <sup>13</sup>C NMR (CDCl<sub>3</sub>, TMS, 75 MHz) δ 13.6, 14.0, 46.2, 52.3, 55.0, 72.3, 111.3, 113.7, 124.5, 124.9, 126.5, 127.7, 129.3, 129.6, 133.1, 136.6, 144.1, 152.5, 159.1, 172.9; IR (KBr) ν: 3445, 2960, 2928, 2836, 1716, 1610, 1585, 1512, 1464, 1438, 1379, 1360, 1305, 1252, 1176, 1130, 1035, 962, 990, 817, 749 cm<sup>-1</sup>. The product was analyzed to determine the diastereoselectivity and enantioselectivity of the reaction: dr = 97:3, 97% ee (major diastereomer) determined by HPLC (Chiralcel AD-H, i-propanol/hexane = 10/90, flow rate 1.0 mL/min, λ = 254 nm); major diastereomer: *t*<sub>minor</sub> = 17.1 min, *t*<sub>major</sub> = 39.5 min; minor diastereomer: 30.0 min, 33.7 min.

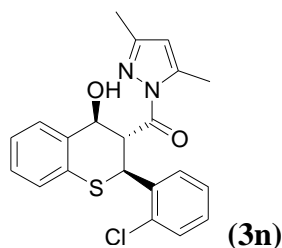

**(2S,3R,4S)-[2-(2-Chloro-phenyl)-4-hydroxy-thiochroman-3-yl)-(3,5-dimethyl-pyrazol-1-yl)-methanone** (Table 3, entry 6):

The title compound was prepared according to the general procedure as described above in 90% yield.  $[\alpha]_D^{25} +57.4$  (*c* 1.51 CHCl<sub>3</sub>); <sup>1</sup>H NMR (CDCl<sub>3</sub>, TMS, 300 MHz) δ 2.18 (s, 3H), 2.34 (s, 3H), 3.33-3.36 (brs, 1H), 4.93-5.00 (t, *J* = 10.2 Hz, 1H), 5.10-5.20 (m, 1H), 5.51-5.54 (d, *J* = 10.8 Hz, 1H), 5.91 (s, 1H), 7.09-7.26 (m, 5H),

7.31-7.37 (m, 2H), 7.74-7.75 (m, 1H);  $^{13}\text{C}$  NMR ( $\text{CDCl}_3$ , TMS, 75 MHz)  $\delta$  13.7, 14.2, 42.5, 51.8, 72.3, 111.5, 125.1, 125.6, 126.5, 127.1, 127.8, 128.7, 128.9, 129.7, 132.6, 134.0, 136.1, 137.2, 144.5, 152.9, 172.6; IR (KBr)  $\nu$ : 3509, 2960, 2928, 2836, 1701, 1590, 1383, 1362, 1335, 1022, 961, 749  $\text{cm}^{-1}$ . The product was analyzed to determine the diastereoselectivity and enantioselectivity of the reaction: dr = 97:3, 97% ee (major diastereomer) determined by HPLC (Chiralcel AD-H, i-propanol/hexane = 10/90, flow rate 1.0 mL/min,  $\lambda$  = 254 nm); major diastereomer:  $t_{\text{minor}}$  = 13.9 min,  $t_{\text{major}}$  = 38.3 min; minor diastereomer: 25.1 min, 33.8 min.

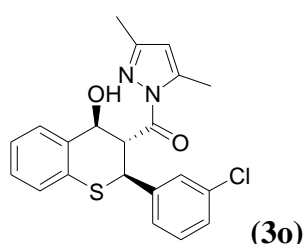

**(2S,3R,4S)-[2-(3-Chloro-phenyl)-4-hydroxy-thiochroman-3-yl]-(3,5-dimethyl-pyrazol-1-yl)-methanone** (Table 3, entry 7):

The title compound was prepared according to the general procedure as described above in 92% yield.  $[\alpha]_{\text{D}}^{25} +119.1$  ( $c$  1.03  $\text{CHCl}_3$ );  $^1\text{H}$  NMR ( $\text{CDCl}_3$ , TMS, 300 MHz)  $\delta$  2.18 (s, 3H), 2.32 (s, 3H), 3.22-3.28 (brs, 1H), 4.80-4.88 (m, 2H), 5.11-5.16 (m, 1H), 5.87 (s, 1H), 7.12-7.26 (m, 6H), 7.40 (s, 1H), 7.70-7.73 (m, 1H);  $^{13}\text{C}$  NMR ( $\text{CDCl}_3$ , TMS, 75 MHz)  $\delta$  13.4, 13.8, 46.2, 52.1, 71.8, 111.3, 124.7, 125.0, 126.2, 127.7, 128.0, 128.3, 129.3, 132.2, 133.9, 136.5, 139.8, 144.1, 152.7, 172.3; IR (KBr)  $\nu$ : 3509, 2926, 2850, 2362, 1704, 1590, 1473, 1383, 1362, 1335, 1294, 1265, 1214, 1127, 1078, 1022, 961, 901, 818, 789, 748  $\text{cm}^{-1}$ . The product was analyzed to determine the diastereoselectivity and enantioselectivity of the reaction: dr = 95:5, 98% ee (major diastereomer) determined by HPLC (Chiralcel AD-H, i-propanol/hexane = 10/90, flow rate 1.0 mL/min,  $\lambda$  = 254 nm); major diastereomer:  $t_{\text{minor}}$  = 13.3 min,  $t_{\text{major}}$  = 43.3 min; minor diastereomer: 26.0 min, 30.0 min.

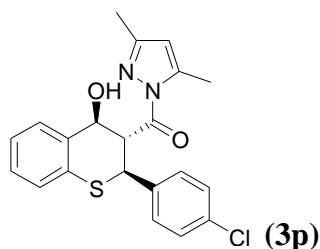

**(2S,3R,4S)-[2-(4-Chloro-phenyl)-4-hydroxy-thiochroman-3-yl]-(3,5-dimethyl-pyrazol-1-yl)-methanone** (Table 3, entry 8):

The title compound was prepared according to the general procedure as described above in 90% yield.  $[\alpha]_D^{25} +111.9$  (*c* 1.45 CHCl<sub>3</sub>); <sup>1</sup>H NMR (CDCl<sub>3</sub>, TMS, 300 MHz) δ 2.18 (s, 3H), 2.34 (s, 3H), 4.84-4.96 (m, 2H), 5.09-5.12 (d, *J* = 9.6 Hz, 1H), 5.90 (s, 1H), 7.16-7.21 (m, 5H), 7.29-7.32 (m, 2H), 7.72-7.75 (m, 1H); <sup>13</sup>C NMR (CDCl<sub>3</sub>, TMS, 75 MHz) δ 13.7, 14.2, 46.1, 52.4, 72.2, 111.6, 124.9, 125.2, 126.5, 127.9, 128.7, 129.7, 132.7, 133.8, 136.9, 144.4, 153.0, 172.5; IR (KBr) ν: 3494, 2925, 2853, 1702, 1586, 1491, 1473, 1435, 1383, 1361, 1336, 1294, 1218, 1130, 1087, 1025, 961, 771, 747 cm<sup>-1</sup>. The product was analyzed to determine the diastereoselectivity and enantioselectivity of the reaction: dr = 98:2, 99% ee (major diastereomer) determined by HPLC (Chiralcel AD-H, i-propanol/hexane = 10/90, flow rate 1.0 mL/min, λ = 254 nm); major diastereomer: *t*<sub>minor</sub> = 11.4 min, *t*<sub>major</sub> = 26.0 min; minor diastereomer: 20.8 min.

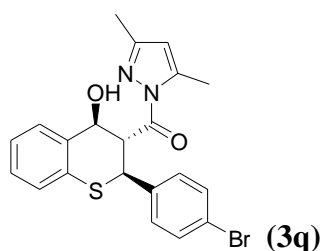

**(2S,3R,4S)-[2-(4-Bromo-phenyl)-4-hydroxy-thiochroman-3-yl]-(3,5-dimethyl-pyrazol-1-yl)-methanone** (Table 3, entry 9):

The title compound was prepared according to the general procedure as described above in 94% yield.  $[\alpha]_D^{25} +108.4$  (*c* 1.79 CHCl<sub>3</sub>); <sup>1</sup>H NMR (CDCl<sub>3</sub>, TMS, 300 MHz) δ 2.18 (s, 3H), 2.34 (s, 3H), 3.18 (brs, 1H), 4.84-4.91 (m, 2H), 5.06-5.12 (m, 1H), 5.91 (s, 1H), 7.15-7.36 (m, 7H), 7.70-7.73 (m, 1H); <sup>13</sup>C NMR (CDCl<sub>3</sub>, TMS, 75 MHz) δ 13.8, 14.2, 46.2, 52.5, 72.3, 111.7, 125.0, 125.2, 126.4, 128.0, 130.0, 131.7, 137.4,

144.5, 150.3, 152.5, 172.5; IR (KBr)  $\nu$ : 3490, 2924, 2898, 1701, 1586, 1488, 1472, 1434, 1385, 1361, 1336, 1290, 1218, 1130, 1073, 1025, 1010, 962, 809, 747  $\text{cm}^{-1}$ . The product was analyzed to determine the diastereoselectivity and enantioselectivity of the reaction: dr = 98:2, 97% ee (major diastereomer) determined by HPLC (Chiralcel AD-H, i-propanol/hexane = 10/90, flow rate 1.0 mL/min,  $\lambda$  = 254 nm); major diastereomer:  $t_{\text{minor}}$  = 11.9 min,  $t_{\text{major}}$  = 26.0 min; minor diastereomer: 22.5 min.

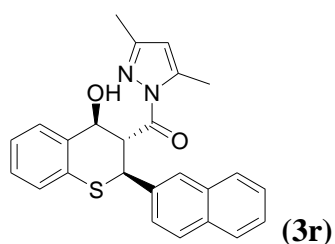

**(2S,3R,4S)-(3,5-Dimethyl-pyrazol-1-yl)-(4-hydroxy-2-naphthalen-2-yl-thio-chroman-3-yl)-methanone** (Table 3, entry 10):

The title compound was prepared according to the general procedure as described above in 87% yield.  $[\alpha]_{\text{D}}^{25} + 89.6$  (*c* 1.43  $\text{CHCl}_3$ );  $^1\text{H}$  NMR ( $\text{CDCl}_3$ , TMS, 300 MHz)  $\delta$  2.16 (s, 3H), 2.22 (s, 3H), 3.01 (brs, 1H), 5.00-5.04 (m, 1H), 5.13-5.18 (m, 2H), 5.78 (s, 1H), 7.18-7.24 (m, 3H), 7.42-7.50 (m, 3H), 7.68-7.74 (m, 4H), 7.80-7.83 (m, 1H);  $^{13}\text{C}$  NMR ( $\text{CDCl}_3$ , TMS, 75 MHz)  $\delta$  13.7, 14.1, 47.1, 52.4, 72.3, 111.4, 124.8, 125.2, 125.6, 126.1, 126.4, 127.5, 127.7, 127.9, 128.3, 133.0, 135.5, 137.0, 144.3, 152.7, 172.8; IR (KBr)  $\nu$ : 3421, 3058, 2964, 2924, 2848, 2360, 2341, 1717, 1585, 1436, 1379, 1359, 1219, 1128, 1037, 962, 772  $\text{cm}^{-1}$ . The product was analyzed to determine the diastereoselectivity and enantioselectivity of the reaction: dr = 97:3, 99% ee (major diastereomer) determined by HPLC (Chiralcel AD-H, i-propanol/hexane = 10/90, flow rate 1.0 mL/min,  $\lambda$  = 254 nm); major diastereomer:  $t_{\text{minor}}$  = 19.4 min,  $t_{\text{major}}$  = 38.7 min; minor diastereomer: 32.3 min.

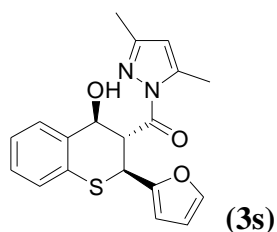

**(2S,3R,4S)-(3,5-Dimethyl-pyrazol-1-yl)-(2-furan-2-yl-4-hydroxy-thiochroman-3-yl)-methanone** (Table 3, entry 11):

The title compound was prepared according to the general procedure as described above in 91% yield.  $[\alpha]_D^{25} +169.6$  (*c* 0.6 CHCl<sub>3</sub>); <sup>1</sup>H NMR (CDCl<sub>3</sub>, TMS, 300 MHz) δ 2.21 (s, 3H), 2.48 (s, 3H), 4.70-4.78 (t, *J* = 10.2 Hz, 1H), 4.99-5.03 (m, 1H), 5.16-5.19 (m, 1H), 5.98 (s, 1H), 6.14-6.20 (m, 2H), 7.20-7.26 (m, 4H), 7.70-7.72 (m, 1H); <sup>13</sup>C NMR (CDCl<sub>3</sub>, TMS, 75 MHz) δ 13.5, 14.0, 39.4, 50.8, 71.6, 107.1, 110.1, 111.3, 125.0, 125.4, 125.9, 127.5, 131.6, 137.6, 142.1, 144.5, 151.6, 152.9, 172.1; IR (KBr) ν: 3480, 2959, 2925, 2853, 2360, 2341, 1706, 1587, 1473, 1438, 1383, 1362, 1261, 1222, 1201, 1165, 1131, 1037, 962, 749 cm<sup>-1</sup>. The product was analyzed to determine the diastereoselectivity and enantioselectivity of the reaction: dr = 95:5, 95% ee (major diastereomer) determined by HPLC (Chiralcel AD-H, i-propanol/hexane = 10/90, flow rate 1.0 mL/min, λ = 254 nm); major diastereomer: *t*<sub>minor</sub> = 13.8 min, *t*<sub>major</sub> = 23.2 min; minor diastereomer: 9.2 min, 9.7 min.

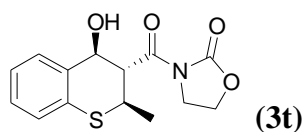

**(2S,3R,4S)-3-(4-Hydroxy-2-methyl-thiochroman-3-carbonyl)-oxazolidin-2-one:**

The title compound was prepared according to the general procedure as described above in 92% yield. <sup>1</sup>H NMR (d<sub>6</sub>-DMSO, TMS, 300 MHz) δ 1.38-1.40 (d, *J* = 6.6 Hz, 3H), 4.15-4.24 (m, 3H), 4.41-4.48 (m, 1H), 4.50-5.58 (m, 2H), 4.90-4.94 (m, 1H), 6.30-6.32 (m, 1H), 7.26-7.32 (m, 2H), 7.68-7.71 (m, 1H); <sup>13</sup>C NMR (d<sub>6</sub>-DMSO, TMS, 75 MHz) δ 20.0, 37.9, 43.5, 51.3, 62.8, 70.9, 125.0, 125.7, 127.3, 128.1, 132.5, 138.4, 154.3, 174.5. The product was analyzed to determine the diastereoselectivity and enantioselectivity of the reaction: dr = 91:9, 62% ee (major diastereomer) determined by HPLC (Chiralcel OD-H, i-propanol/hexane = 30/70, flow rate 1.0 mL/min, λ = 220 nm); major diastereomer: *t*<sub>minor</sub> = 13.2 min, *t*<sub>major</sub> = 10.7 min; minor diastereomer: 15.3 min, 22.1 min.

### III. Synthetic transformation of the *sulfa*-Michael-Aldol adduct **3a**<sup>3,4</sup>

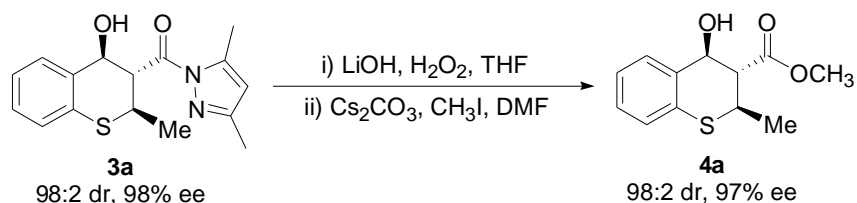

To the solution of 30% H<sub>2</sub>O<sub>2</sub> (0.14 mL) in water (0.16 mL) was added LiOH·H<sub>2</sub>O (19.2 mg, 0.45 mmol) at 0 °C. The reaction mixture was stirred at 0 °C for 5 min, and the solution of *sulfa*-Michael-Aldol adduct **3a** (90.6 mg, 0.3 mmol) in THF (0.86 mL) was added over 15 min. After completion monitored by TLC then carefully treated with a saturated aqueous solution of Na<sub>2</sub>S<sub>2</sub>O<sub>3</sub> (0.92 mL) followed by 2 M aqueous solution of HCl (2 mL). The mixture was extracted with EtOAc (3 x 5 mL), dried over MgSO<sub>4</sub>, and removed under reduced pressure to give the crude carboxylic acid product, which can be used without purification.

To the solution of the residue in dry DMF (3.0 mL) with stirring, was added CH<sub>3</sub>I (64 mg, 0.45 mmol) followed by the addition of Cs<sub>2</sub>CO<sub>3</sub> (147 mg, 0.45 mmol) under a positive pressure of argon at room temperature. The resulting mixture was stirred overnight. The mixture was treated with 2 M aqueous solution of HCl, and then extracted with EtOAc (3 x 5 mL), dried over MgSO<sub>4</sub>, filtered and concentrated in vacuo. The crude product was purified by flash chromatography on silica gel to afford the product **4a** in 75% yield (53.6 mg). [α]<sub>D</sub><sup>25</sup> +17.6 (c 0.3, CHCl<sub>3</sub>); <sup>1</sup>H NMR (CDCl<sub>3</sub>, TMS, 300 MHz) δ 1.30-1.32 (d, *J* = 6.6 Hz, 3H), 2.66-2.73 (m, 1H), 3.60-3.63 (m, 1H), 3.81 (s, 3H), 4.95-4.99 (m, 1H), 7.11-7.15 (m, 3H), 7.60-7.62 (m, 1H); <sup>13</sup>C NMR (CDCl<sub>3</sub>, TMS, 75 MHz) δ 20.2, 36.6, 52.2, 56.6, 71.0, 124.8, 125.8, 126.1, 127.8, 132.4, 135.8, 173.6; The product was analyzed to determine the diastereoselectivity and enantioselectivity of the reaction: dr = 98:2, 97% ee (major diastereomer) determined by HPLC (Chiralcel AS-H, i-propanol/hexane = 10/90, flow rate 1.0 mL/min, λ = 254 nm); major diastereomer: *t*<sub>minor</sub> = 30.6 min, *t*<sub>major</sub> = 13.4 min; minor diastereomer: 10.2 min, 25.1 min.



#### IV. X-ray Crystal Structures of (2*S*,3*R*,4*S*)-**3r**

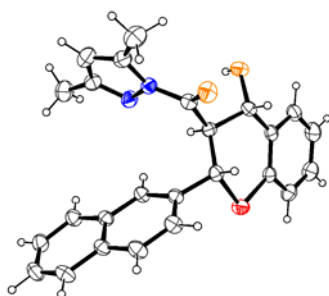

Crystal data for (2*S*,3*R*,4*S*)-**3r**: C<sub>25</sub>H<sub>22</sub>N<sub>2</sub>O<sub>2</sub>S,  $M_r = 414.51$ ,  $T = 293$  K, Orthorhombic, space group  $P2(1)2(1)2(1)$ ,  $a = 5.8585(10)$ ,  $b = 11.5282(19)$ ,  $c = 30.948(5)$  Å,  $V = 2090.2(6)$  Å<sup>3</sup>,  $Z = 4$ , 9744 unique reflections, final  $R_1 = 0.0393$  and  $wR_2 = 0.0910$  for 3424 observed [ $I > 2\sigma(I)$ ] reflections, Flack  $\chi = -0.11(10)$ . CCDC 861217 contains the supplementary crystallographic data for this paper. These data can be obtained free of charge via [www.ccdc.cam.ac.uk/conts/retrieving.html](http://www.ccdc.cam.ac.uk/conts/retrieving.html) (or from the Cambridge Crystallographic Data Centre, 12, Union Road, Cambridge CB21EZ, UK; fax: (+44) 1223-336-033; or [deposit@ccdc.cam.ac.uk](mailto:deposit@ccdc.cam.ac.uk)).

#### V. Proposed Transition-State Model for the Asymmetric Domino *sulfa*-Michael-Aldol Reaction

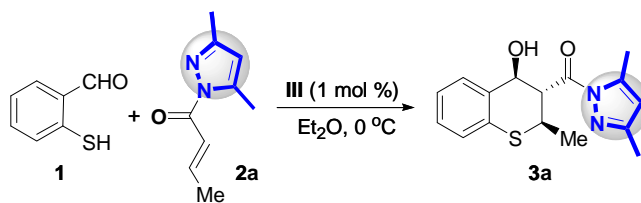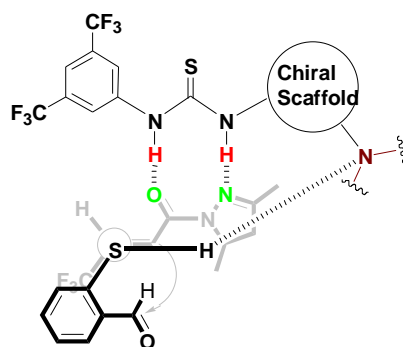

## VI. References

- [1] T. Šmejkal, B. Breit, *Angew. Chem. Int. Ed.* **2008**, *47*, 3946.
- [2] a) A. R., Katritzky, Y. Zhang, S. K. Singh, *Synthesis*, **2003**, *18*, 2795; b) C. Kashima, H. Harada, I. Kita, I. Fukuchi, A. Hosomi, *Synthesis* **1994**, 61.
- [3] A. B. Smith III, T. Bosanac, K. Basu, *J. Am. Chem. Soc.* **2009**, *131*, 2348.
- [4] J. P. Parrish, E. E. Dueno, S.-I. Kim, K. W. Jung, *Synth. Commun.* **2000**, *30*, 2687.

## VII. $^1\text{H}$ NMR and $^{13}\text{C}$ NMR Spectra

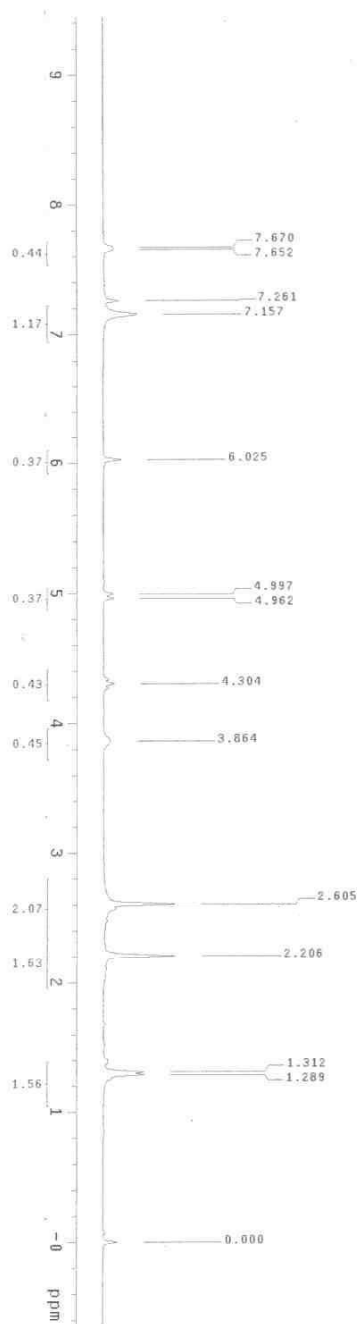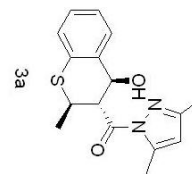

FX-4-18C

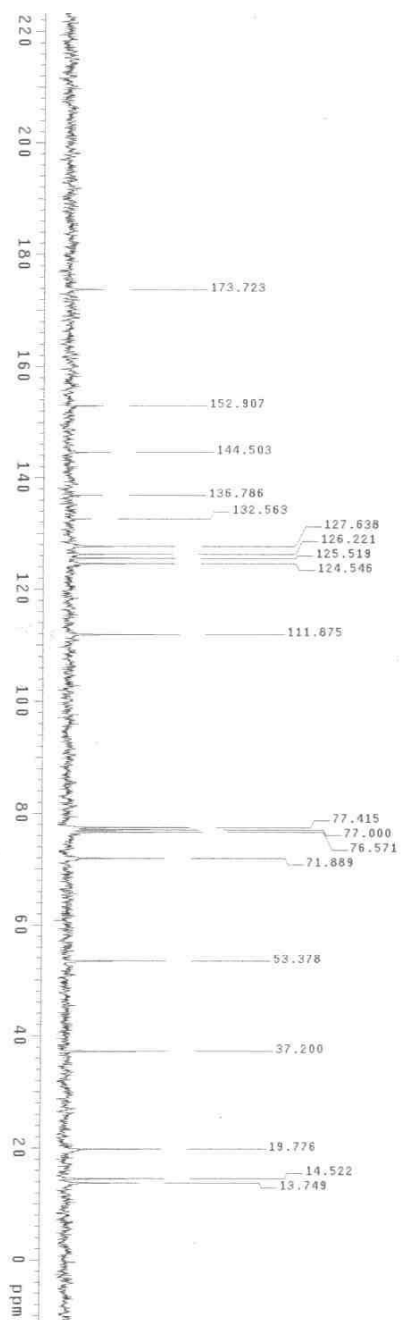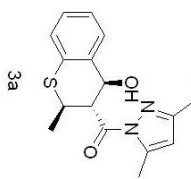

13-1x-4-48c  
Solvent: CDCl3  
Ambient temperature  
Mascij\_3098 Mascij\_3000  
Relax. delay 1.000 sec  
Pulse 28.0 degrees  
Acq. time 0.500 sec  
71.000 MHz  
71.000 MHz  
OBSERVE C13 75.455414 MHz  
DECUPLE H1 300.0815982 MHz  
Power 40 dB  
P1 1.000000 sec  
P2 1.000000 sec  
WAIT 2.100000 sec  
DATA PROCESSING  
Line broadening 4.0 Hz  
FT size 32768  
Total time 2 hr, 24 min, 23 sec

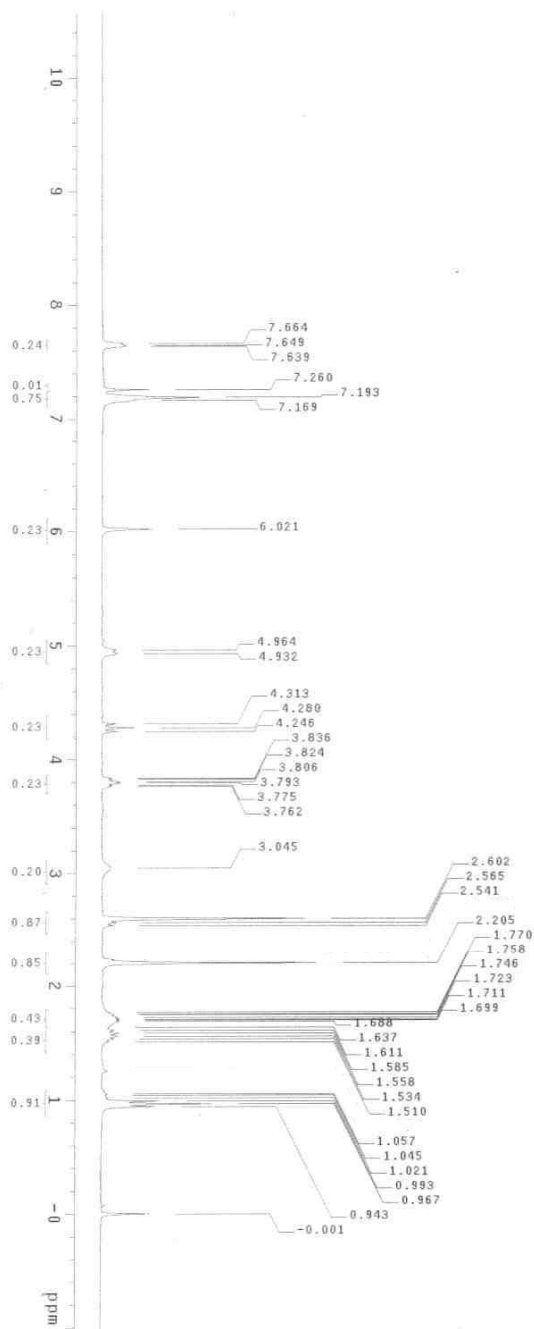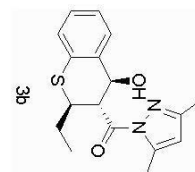

3b-4-653

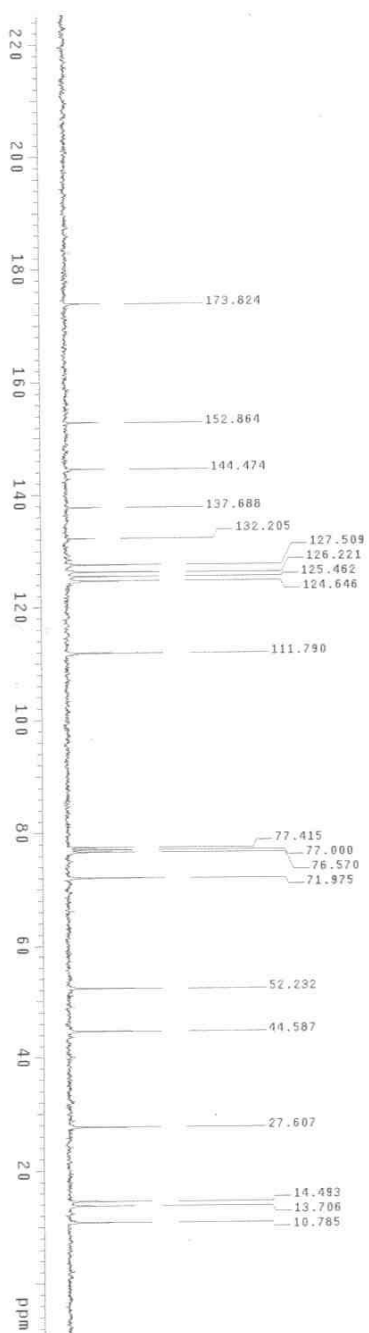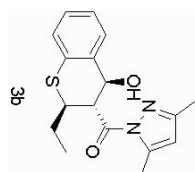

Solvent: CDCl3  
Ambient temperature  
Mercury-300BB Mercury300v  
Pulse delay: 1.000 sec  
Pulse: 28.0 degrees  
Acq. time: 0.500 sec  
Width: 17699.1 Hz  
128 repetitions: 4552800 MHz  
Q18: 128.1300000 MHz  
DECOUPLE: H1, 300.0015302 MHz  
Power: 40 dB  
continuously on  
MULTI PROC SSING  
DML: PROC SSING  
Line broadening: 4.0 Hz  
FT size: 32768  
Total time: 2 hr, 24 min, 23 sec

C13FX--6-656

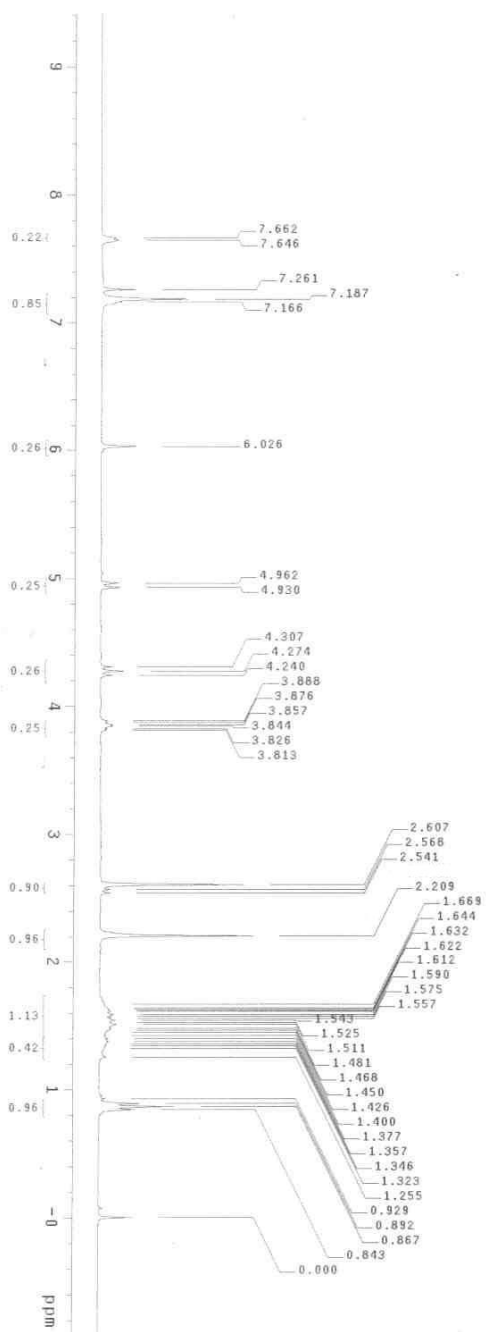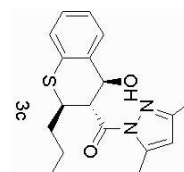

TK-4-650

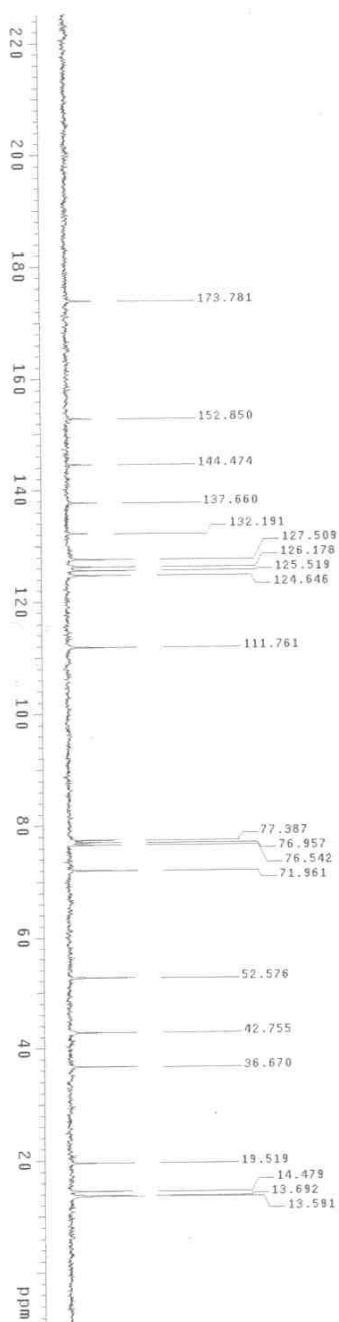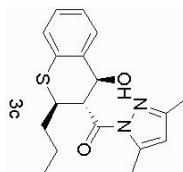

Solvent: CDCl<sub>3</sub>  
Ambient temperature  
Mercury-300BB Mercury300™  
Pulse delay 1.000 sec  
Acq. time 0.580 sec  
Width 17699.1 Hz  
88 Spectrums 75.0552800 MHz  
088 Spectrums 300.0815302 MHz  
DECUPLE H1, 300.0815302 MHz  
Power 40 dB  
continuously on  
MULTIPROCESSING  
DATA ACQUISITION  
Line broadening 4.0 Hz  
FT size 32768  
Total time 2 hr, 24 min, 23 sec

C13FX-4-65D



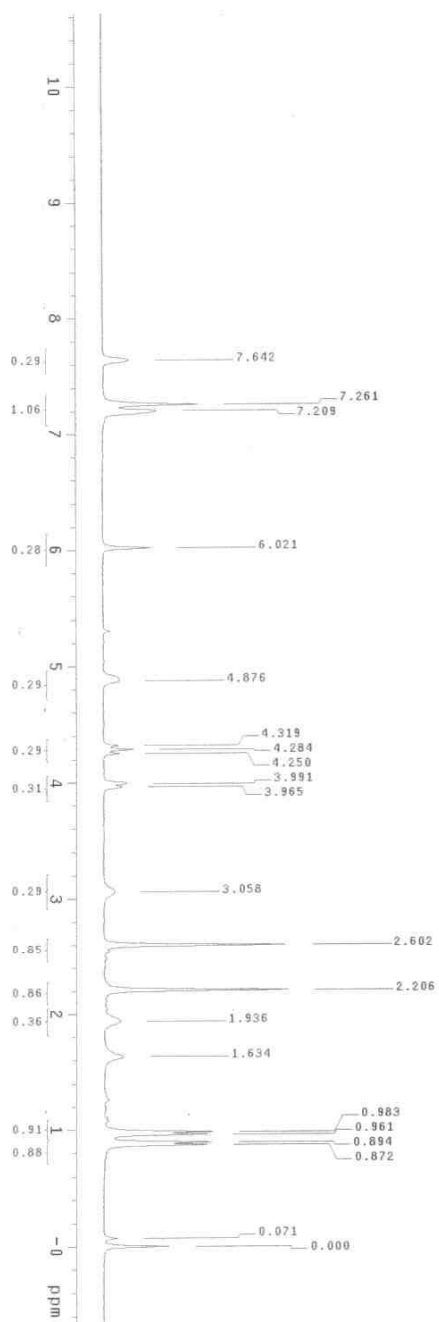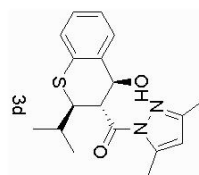

FX-4-72b

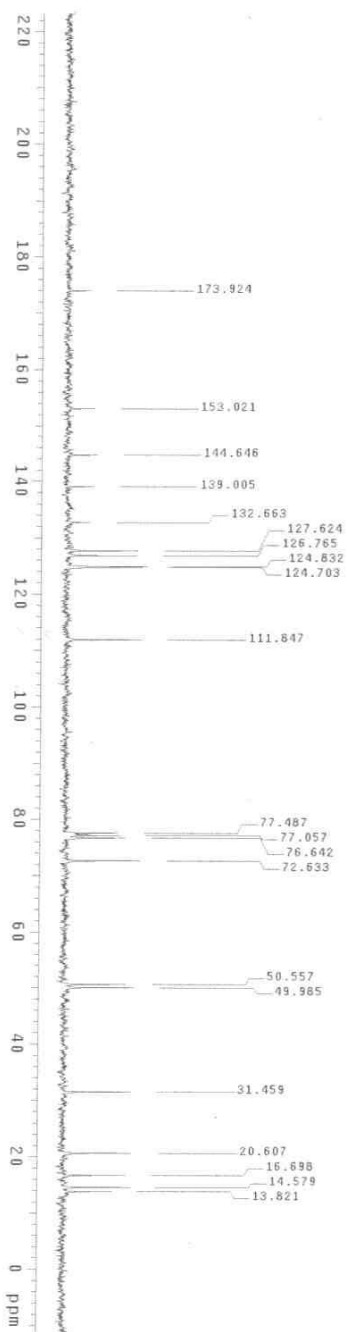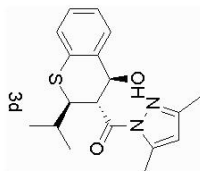

File: c13-fx-4-72b  
Solvent: CDCl3  
Ambient Temperature  
Mercury-300BB "mercury300"  
Relax. delay 1.000 sec  
Pulse 28.0 degrees  
Acq. time 4.999 sec  
Width 1769.1 Hz  
48 repetitions  
OBSERVE C13, 75.4534414 MHz  
PULPROG zgpg30  
Power 40 dB  
Continuously on  
WALTZ-16 modulated  
DATA PROCESSING  
AQ 4.0000000000000000  
FT SIZE 32768  
Total time 2 hr, 24 min, 23 sec

c13-fx-4-72b

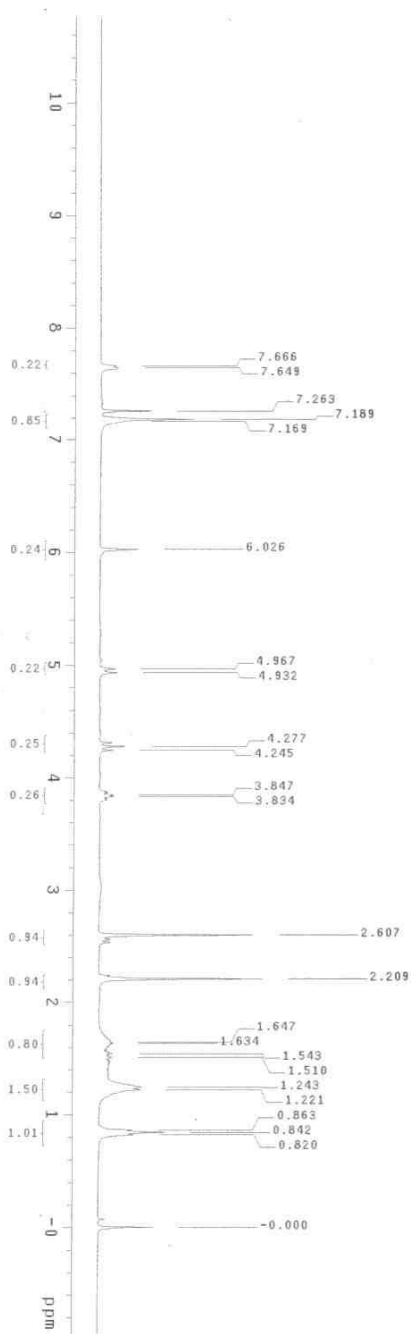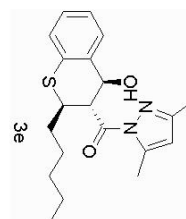

TK-4-65C

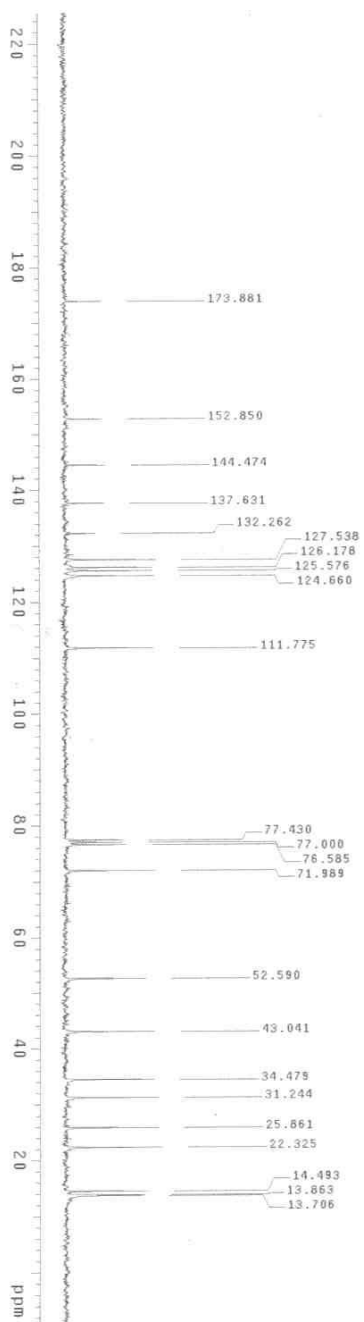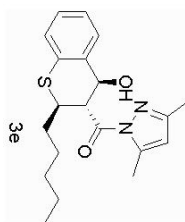

Solvent: CDCl<sub>3</sub>  
Ambient temperature  
Mercury-300BB Mercury300™  
Relax. delay 1.000 sec  
Pulse: 28.0 degrees  
Acq. time 0.500 sec  
Width 17699.1 Hz  
Observed F1 300.0815382 MHz  
Operating F1 300.0815382 MHz  
DECUPLE H1 300.0815382 MHz  
Power 40 dB  
continuously on  
Line broadening 4.0 Hz  
DATA PROCESSING  
FT size 32768  
Total time 2 hr, 24 min, 23 sec

C13FX-4-656

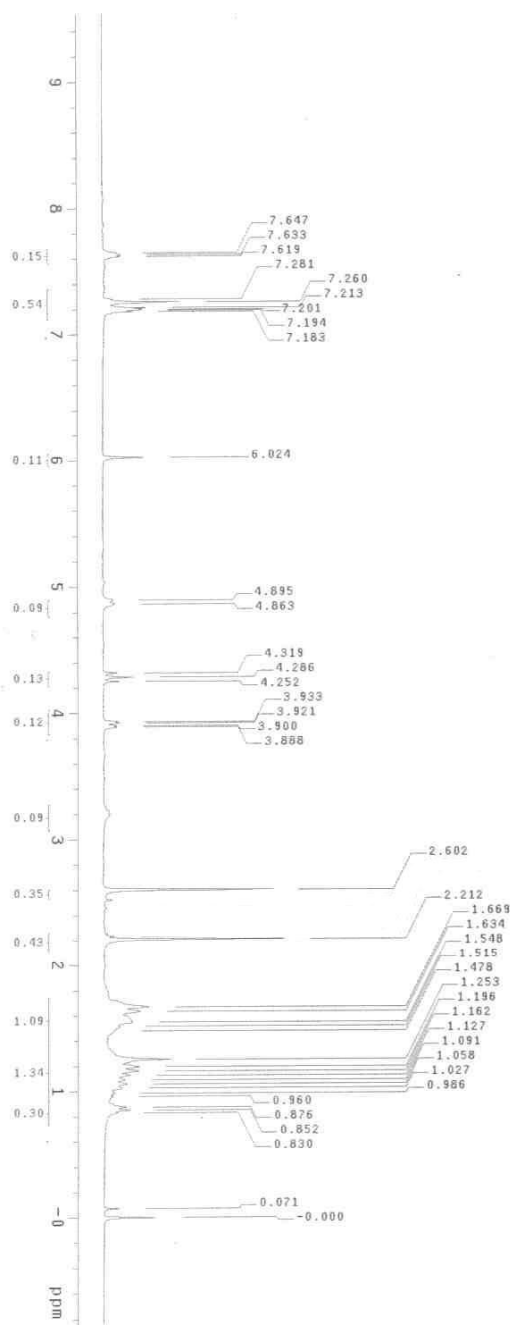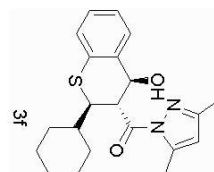

D-13-73C

C13d-13-73c

Solvent: CDCl<sub>3</sub>  
Ambient Temperature  
Mercury-300BB "mercury300"  
Relax. delay 1.000 sec  
Acq. time 0.500 sec  
Width 17699.1 Hz  
128 repetitions  
AQ 0.50000000  
DECUPLE H1 300.0815302 MHz  
Power 40 db  
continuously on  
WALTZ16 modulated  
D1 0.00000000  
Line Broadening 4.0 Hz  
FT size 32768  
Total time 2 hr, 24 min, 23 sec

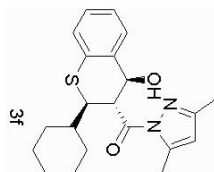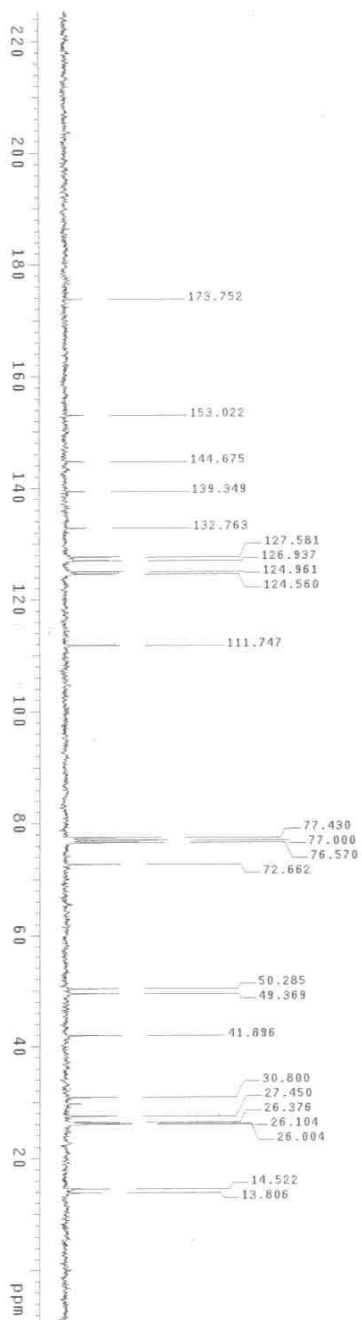

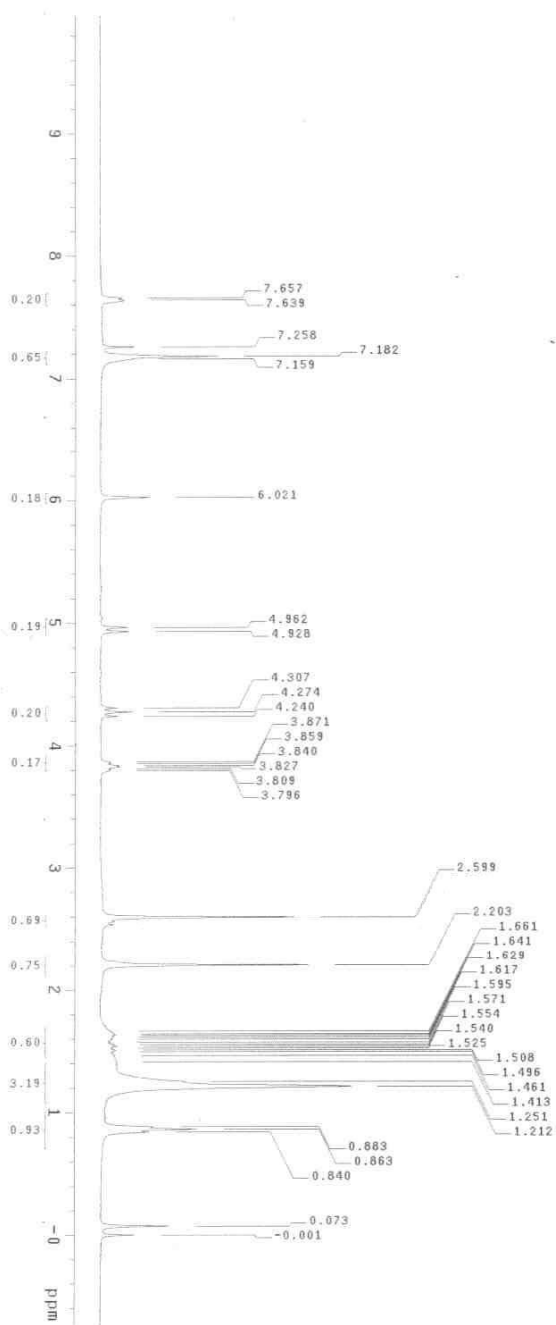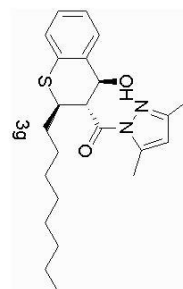

fx-4-01

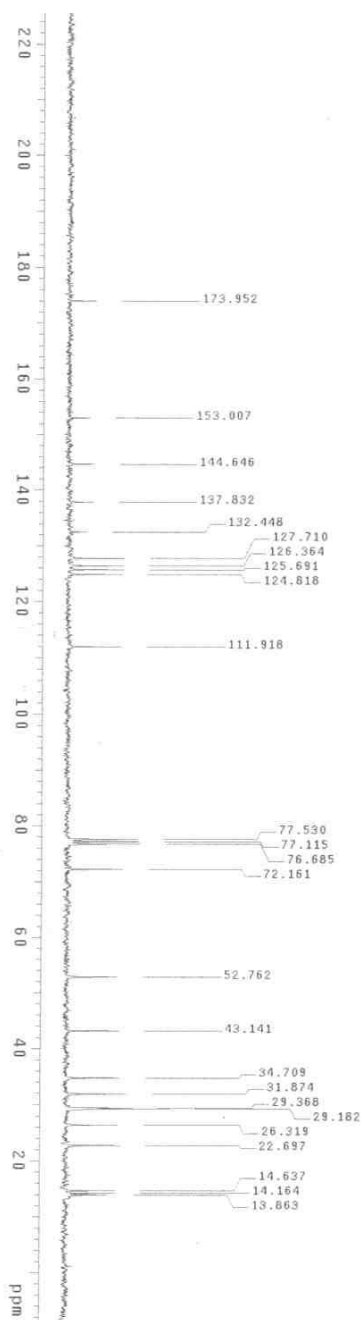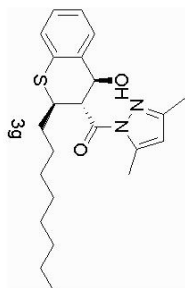

Solvent: CDCl3  
Ambient temperature  
Mercury-30008 Mercury3000  
Pulse: delay 1.000 sec  
Acq. time 0.580 sec  
Width 17699.1 Hz  
Resolution  
Observed F1: 300.0815382 MHz  
Decouple H1: 300.0815382 MHz  
Power 40 dB  
continuously on  
Acquisition  
Line broadening 4.0 Hz  
DATA PROCESSING  
FT size 32768  
Total time 2 hr, 24 min, 23 sec

CI3FX-I-81



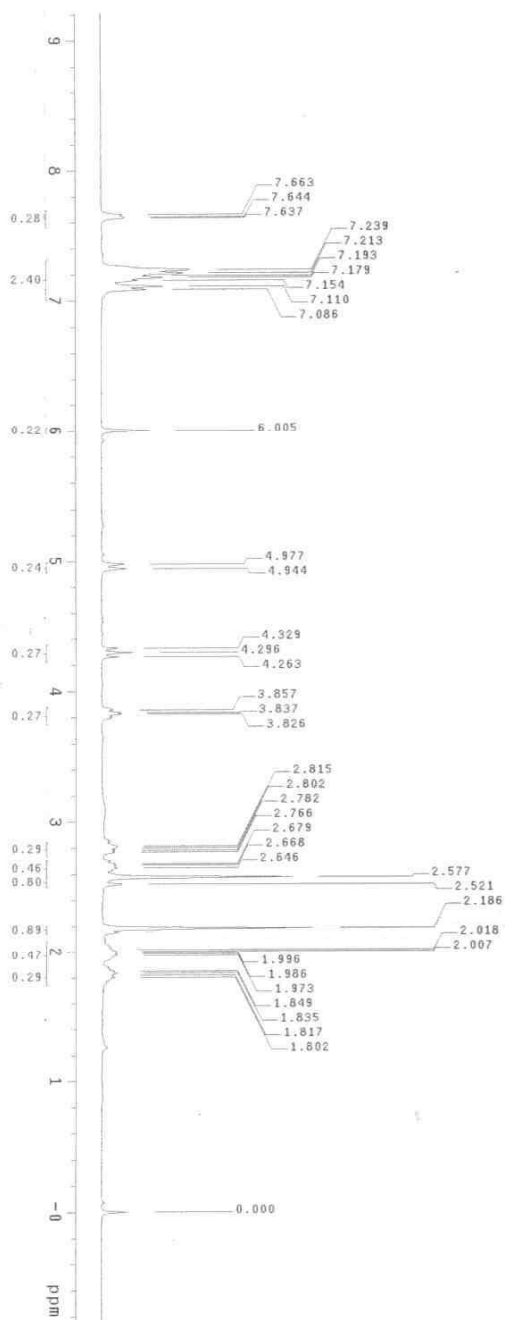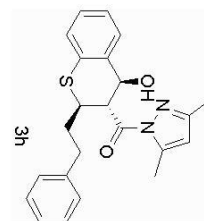

EX-4-77A

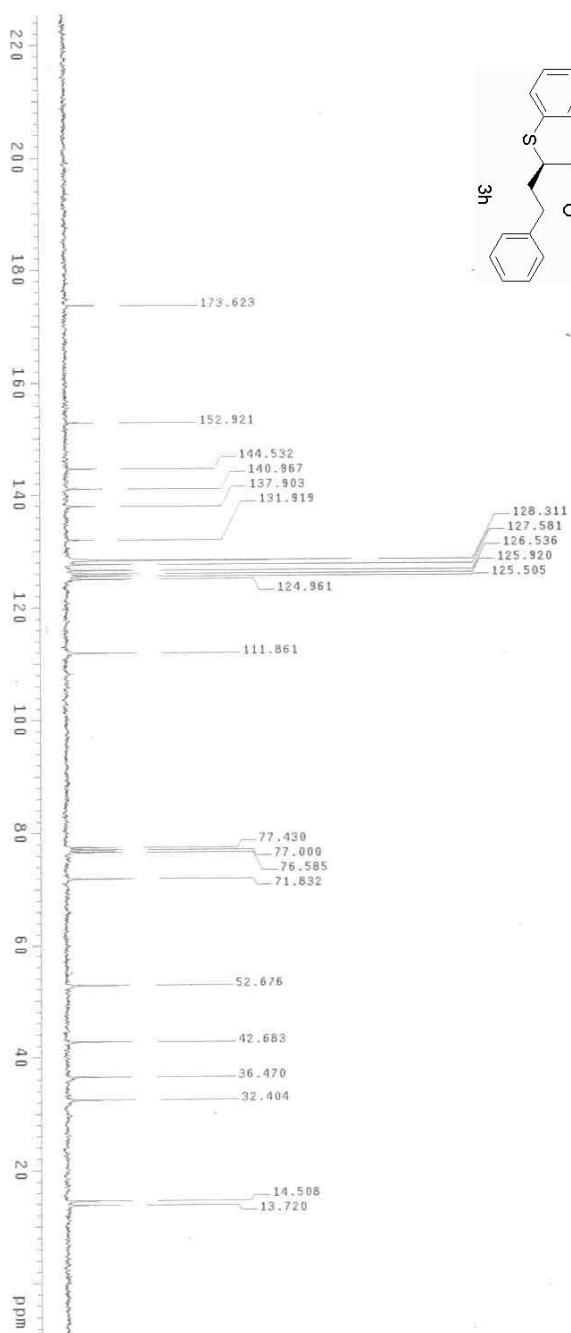

Solvent: CDCl<sub>3</sub>  
Ambient temperature  
Mercury-300BB Mercury300  
Pulse: delay 1.000 sec  
Acq. time 0.500 degrees  
Width 17699.1 Hz  
Spectrum 15  
Observed 15  
Decouple H1 300.0815382 MHz  
Power 4b 48  
continuously on  
continuously on  
DATA PROCESSING  
Line broadening 4.0 Hz  
FT size 32768  
Total time 2 hr, 24 min, 23 sec

G13FX-4-774

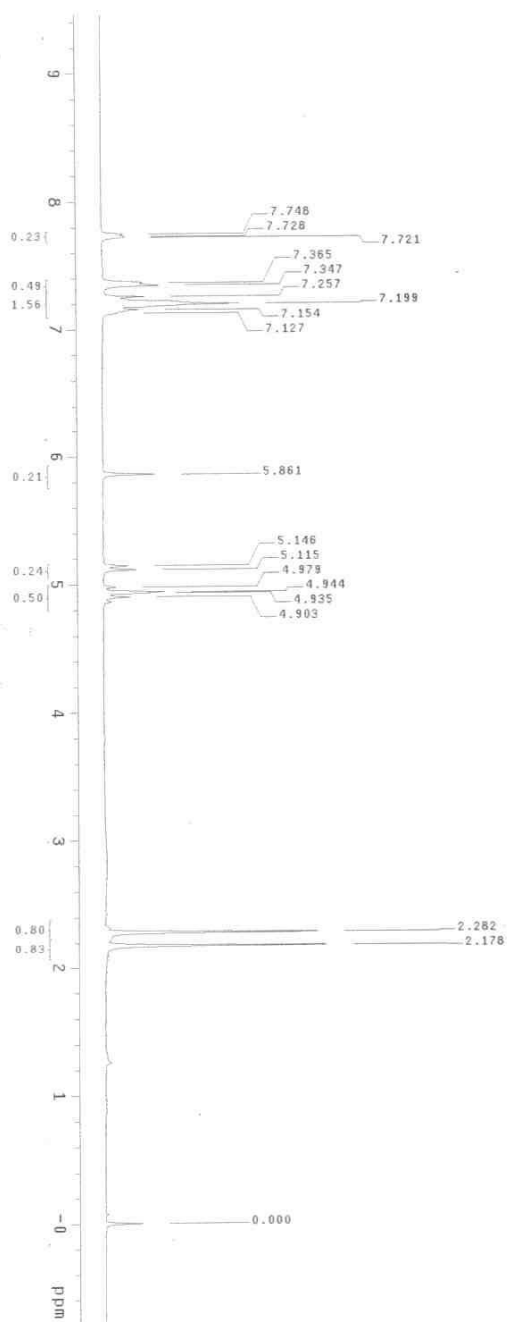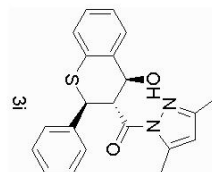

EX-4-77c



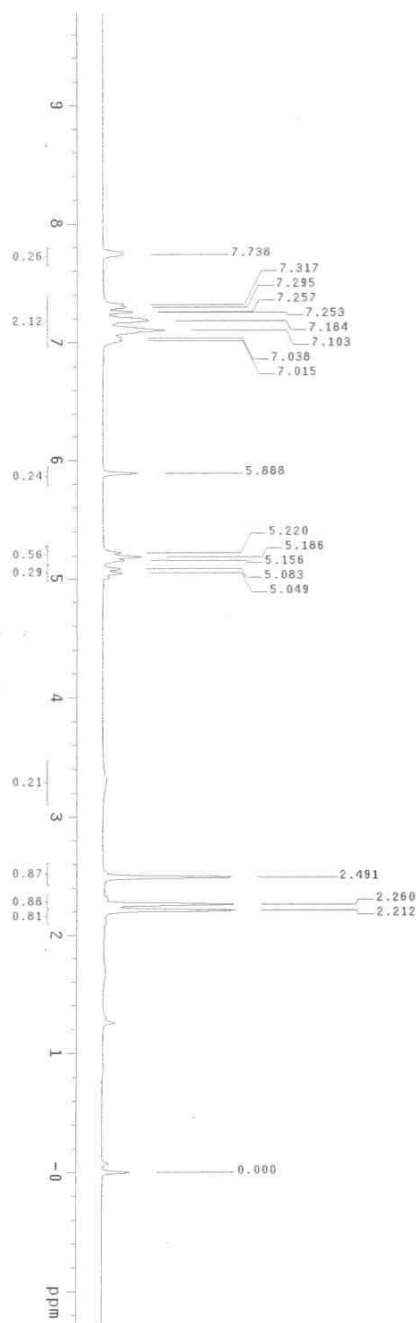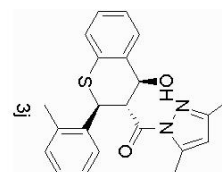

1K-1-7C

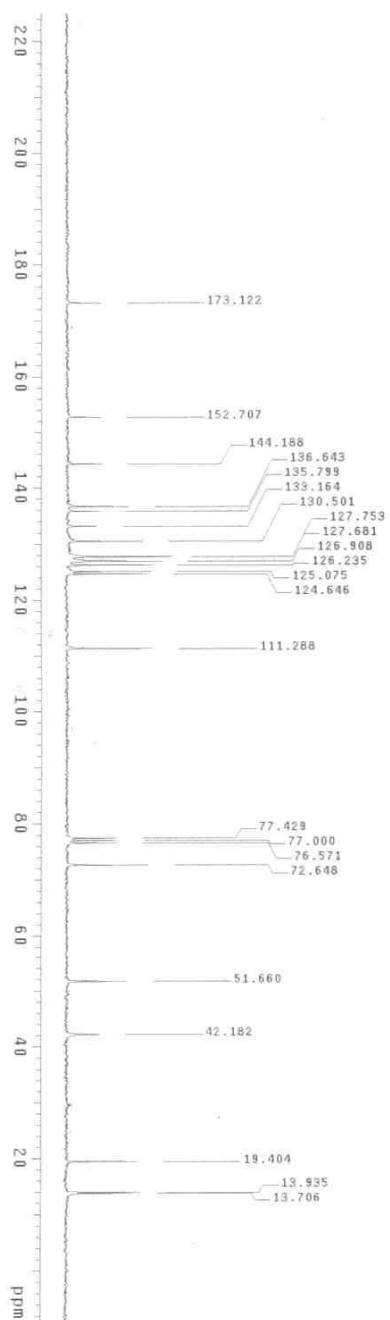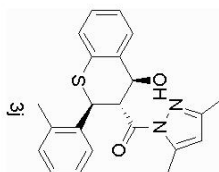

C131K-1-7c  
Solvent: CDCl3  
Ambient temperature  
Mercury-500BD Mercury900  
Relax. delay 1.000 sec  
Pulse 28.0 degree  
Acq. time 0.500 sec  
Width 17699.1 Hz  
Observed C13 10175.9553107 MHz  
Decouple H1 300.0015302 MHz  
Power 40 dB  
continuously on  
Acq. mode gated  
Line Broadening 4.0 Hz  
DATA PROCESSING  
FT size 32768  
Total time 2 hr, 24 min, 23 sec

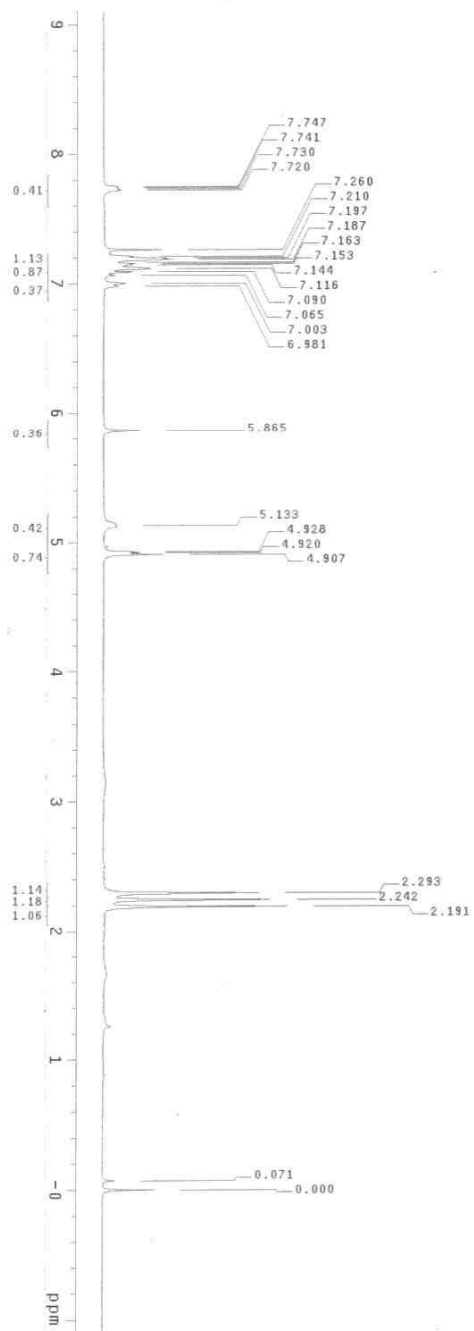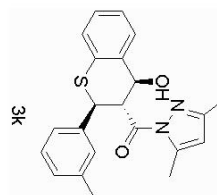

1k-1-7d  
Archive directory: /export/home/au/vnmr/sy/data  
Sample directory:  
Pulse Sequence: szpu1

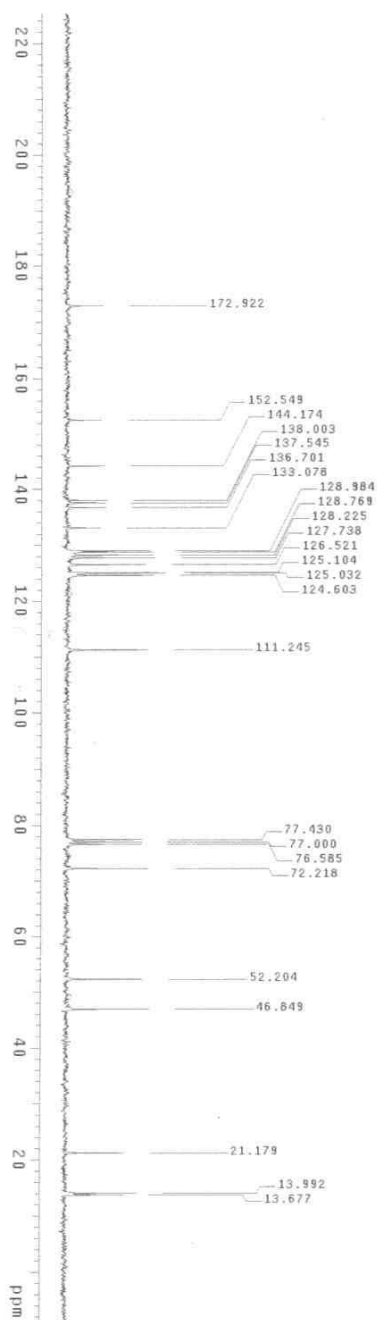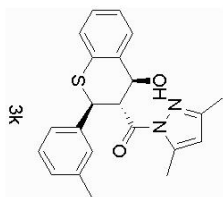

C131K-I-7d  
Solvent: CDCl3  
Ambient temperature  
Mercury-300DB Mercury300+  
Relax. delay 1.000 sec  
Pulse 28.0 degrees  
Acq. time 0.500 sec  
Width 17693.1 Hz  
SFO 101.625 MHz  
OBSERVE C13 75.4552848 MHz  
DECUPLE H1 300.0815362 MHz  
Power 40 dB  
CONTINUOUSLY ON  
NOISE SUPPRESSION OFF  
DATA PROCESSING  
Line Broadening 4.0 Hz  
FT size 32768  
Total time 2 hr, 24 min, 23 sec





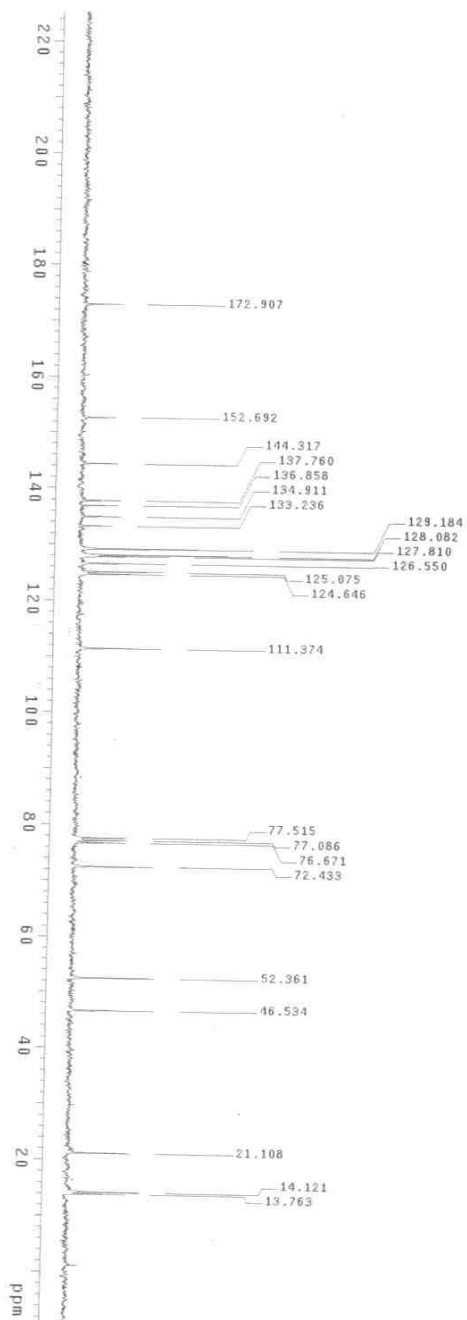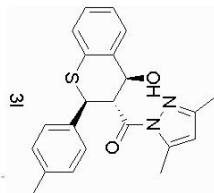

c131j-1-45c  
Solvent: CDCl3  
Ambient temperature  
Mercury-3000B Mercury3000  
Relax. delay 1.000 sec  
Pulse 28.0 degree  
Acq. time 0.580 sec  
FID 17693.1 Hz  
OBSERVE C13  
DECOUPLE H1, 300.0815382 MHz  
Power 40 db  
VOLT INCREASE BY ON  
VOLT 2.000000  
DATA PROCESSING  
Line broadening 4.0 Hz  
FT size: 32768  
Total time 2 hr, 24 min, 23 sec

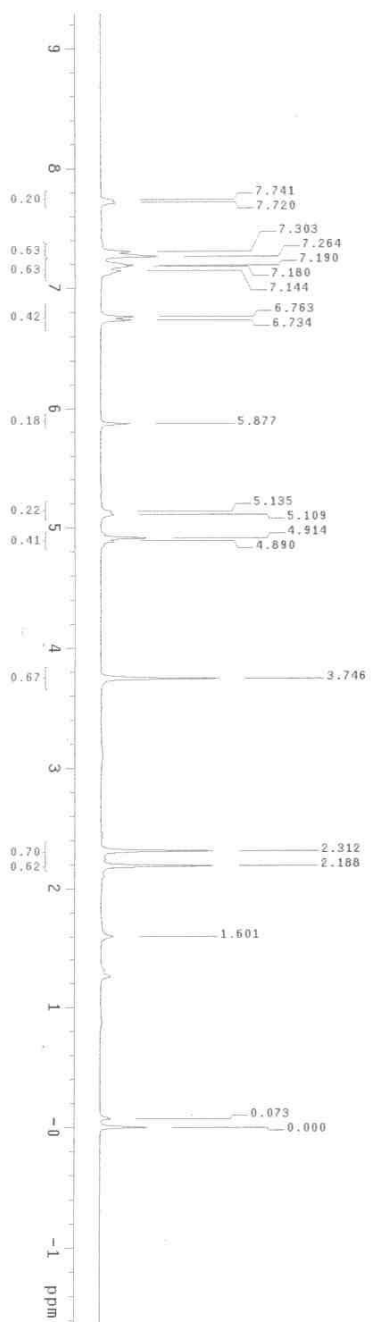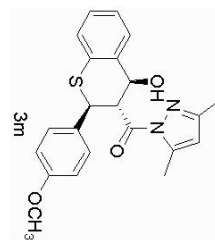

1j-1-45d

C131J-1-45d

Solvent: CDCl3  
Ambient temperature  
Mercury-3000B Mercury3000  
Relax. delay 1.000 sec  
Pulse 28.0 degrees  
Acq. time 0.500 sec  
Width 17893.1 Hz  
NUC1 13C  
P1 12.000 sec  
OBSERVE C13 75.452399 MHz  
DECUPLE H1 300.0815382 MHz  
Power 40 dB  
Continuously on  
Acquiring 1000000  
Line broadening 4.0 Hz  
DATA PROCESSING  
FT size 32768  
Total time 2 hr, 24 min, 23 sec

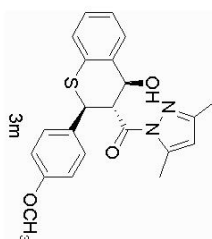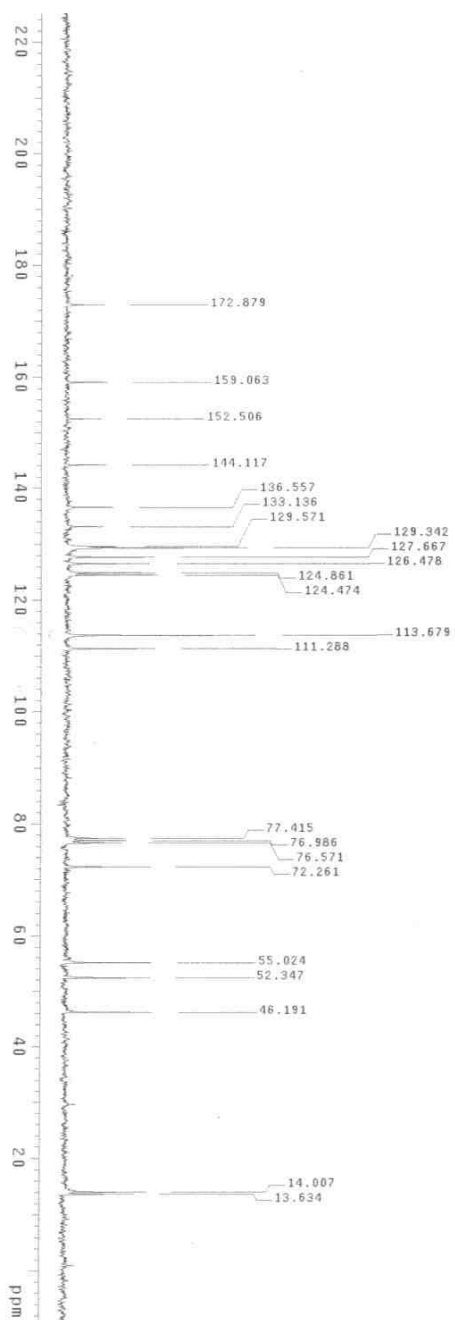

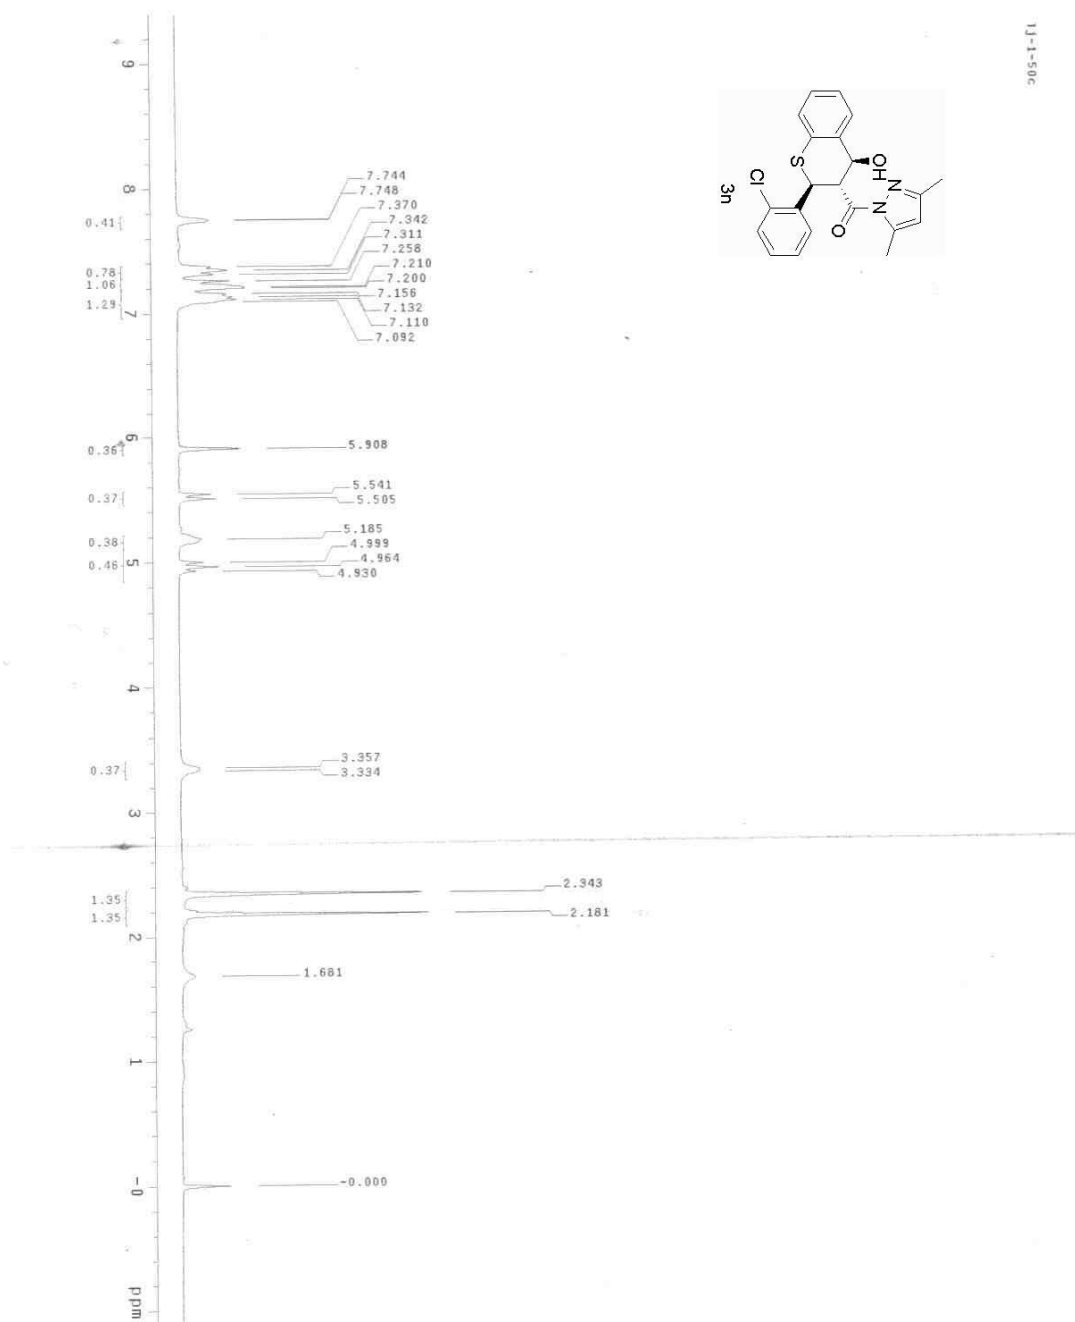

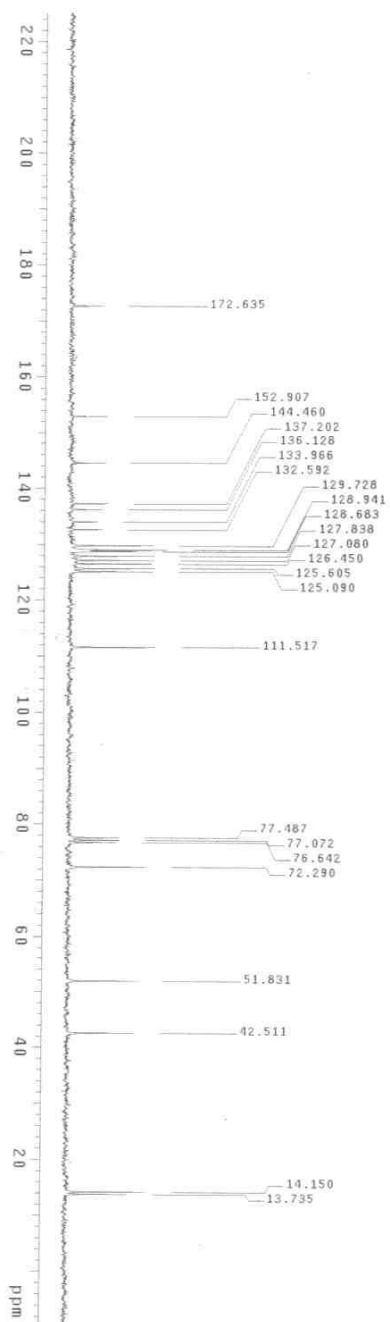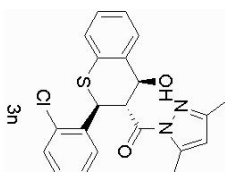

Solvent: CDCl<sub>3</sub>  
Ambient temperature  
Mercury-500088 "mercury300"  
Pulse: delay 1.000 sec  
Pulse: 28.0 degrees  
Acq. time 0.500 sec  
Width 17699.1 Hz  
Observed F1 300.0015382 MHz  
Observed F2 75.4552399 MHz  
DECUPLE H1, 300.0015382 MHz  
Power 40 dB  
continuously on  
No decoupling  
DATA PROCESSING  
Line broadening 4.0 Hz  
FT size 32768  
Total time 2 hr, 24 min, 23 sec

C131J-1-50c

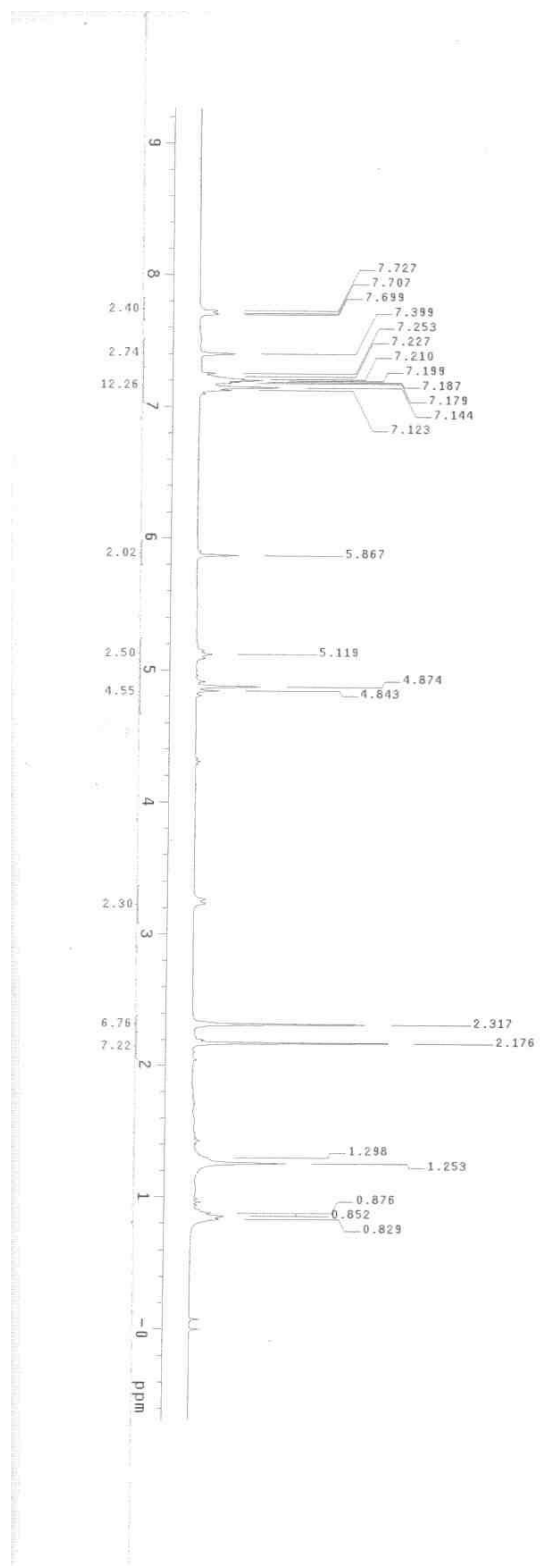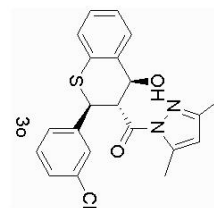

055-1-55b

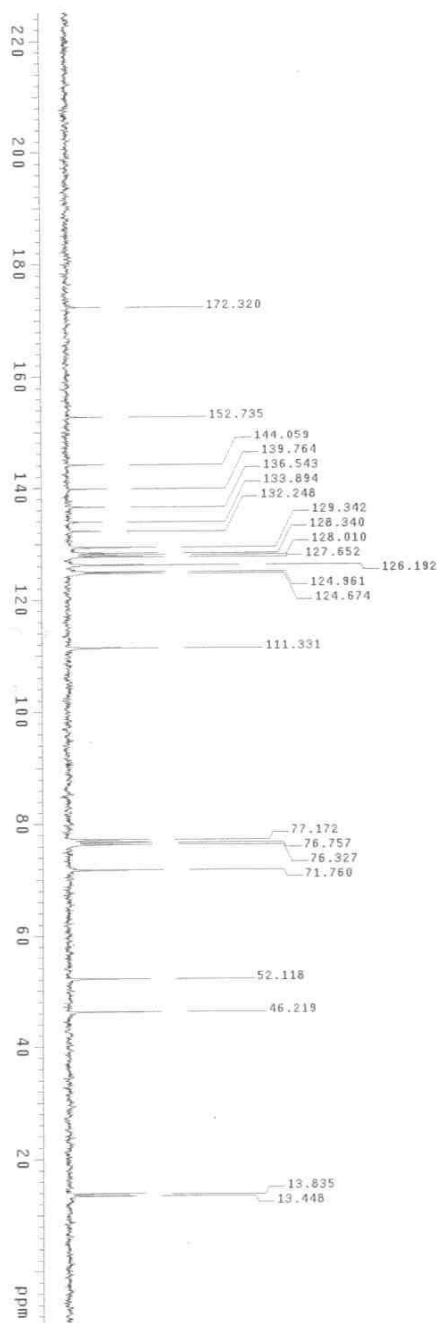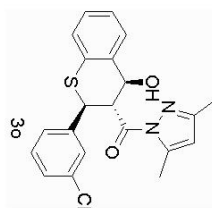

CI31J-1-55D  
Solvent: CDCl3  
Ambient Temperature  
Mascity: 50088 Mascity300"  
Relax. delay 1.000 sec  
Pulse 28.0 degrees  
Acq. time 0.500 sec  
Vfreq 128.131 MHz  
Vidm 128.131 MHz  
OBSERVE C13 75.4552999 MHz  
DECOUPLE H1 300.0815382 MHz  
Power 40 db  
CONTINUED  
VPRZ14  
WATERGATE  
DATA PROCESSING  
Line broadening 4.0 Hz  
FT size 32768  
Total Time 2 hr, 24 min, 23 sec



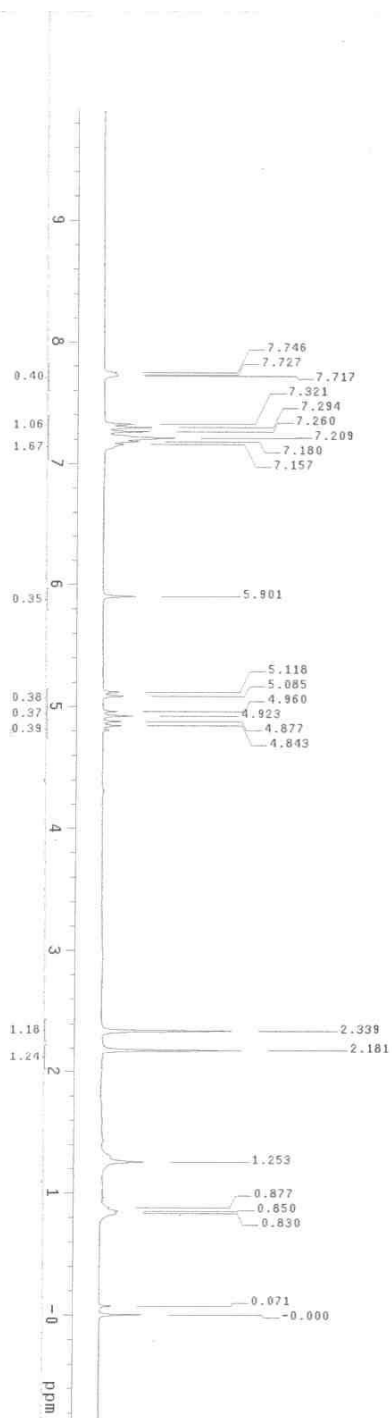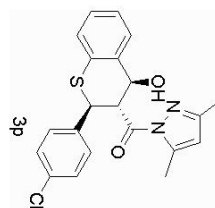

dxq-1-47c

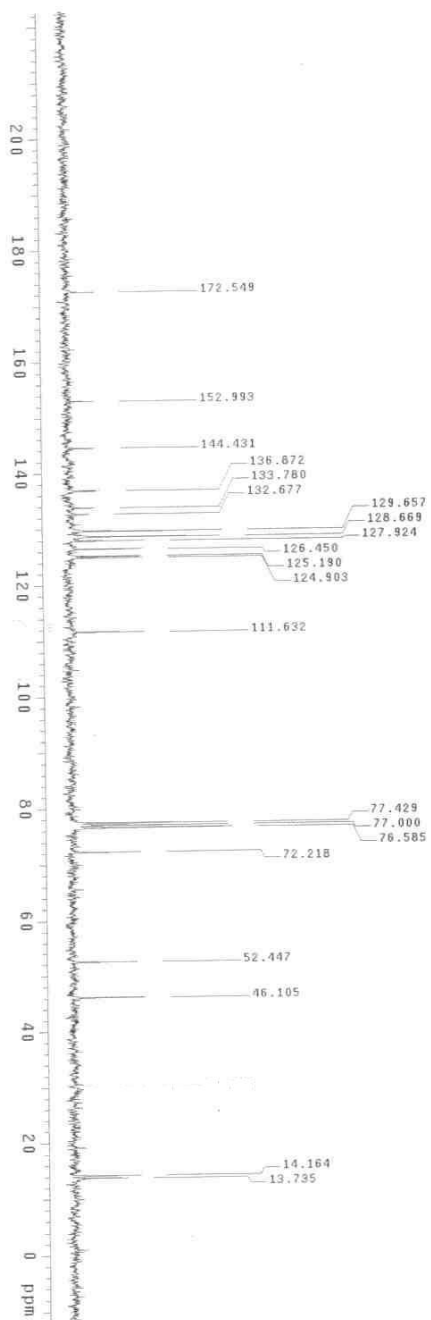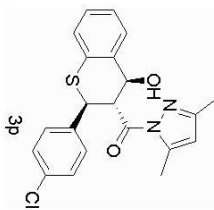

c131j-1-47c  
Solvent: CDCl3  
Ambient temperature  
Mercury-30088 "mercury300"  
Relax. delay 1.000 sec  
Pulse program zgpg30  
Acq. time 0.500 sec  
Width 17595.1 Hz  
136 repetitions  
OBSERVE CH3 45.454718 MHz  
PULSEPROG zgpg30  
Power 40 dB  
continuously on  
WALTZ-16 modulated  
DATA PROCESSING 4.0 Hz  
FT size 32768  
Total time 2 hr., 24 min., 23 sec

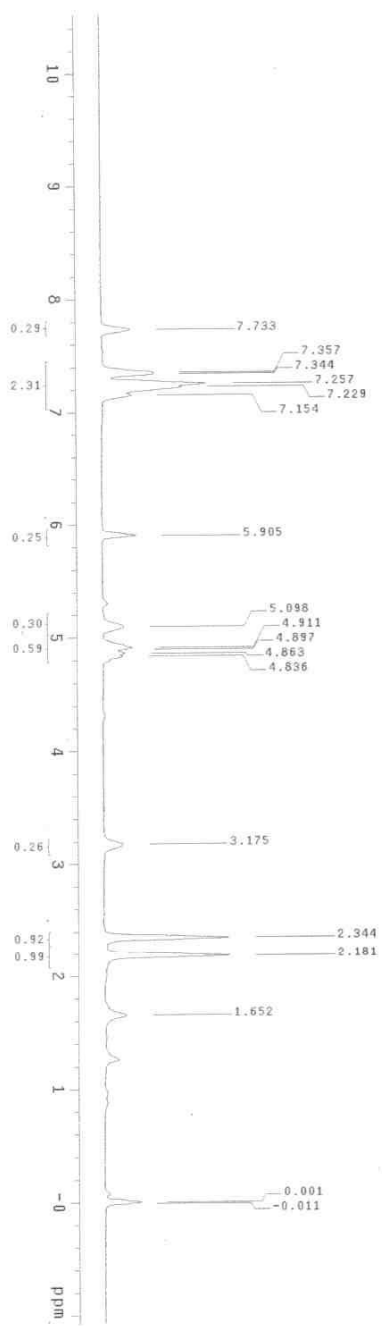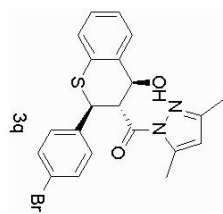

13-1-07d

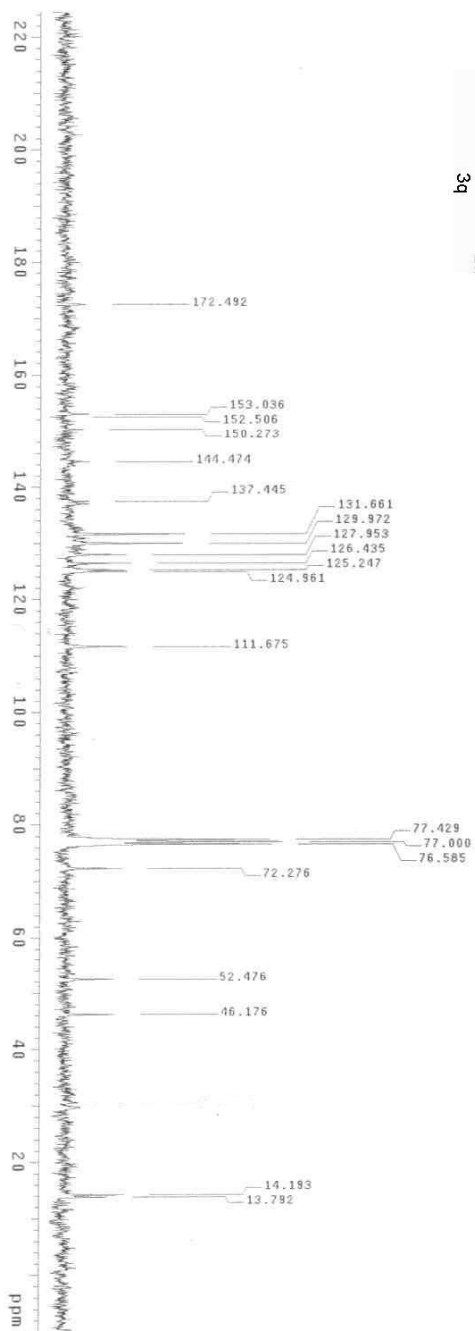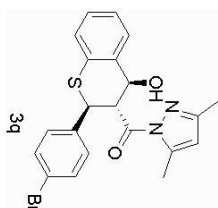

Solvent: CDCl3  
Ambient temperature  
Mercury-300WB Mercury300W  
Relax. delay 1.000 sec  
Pulse 28.0 degrees  
Acq. time 0.500 sec  
Width 17699.1 Hz  
SFO 101.254 MHz  
OBSERVE C13 101.25453528 MHz  
DECUPLE H1 300.0815382 MHz  
Power 40 dB  
CONTINUOUSLY ON  
NOISE SUPPRESSION ON  
Line broadening 4.0 Hz  
DATA PROCESSING  
FT size 32788  
Total time 2 hr, 24 min, 23 sec

C13J1-1-47d

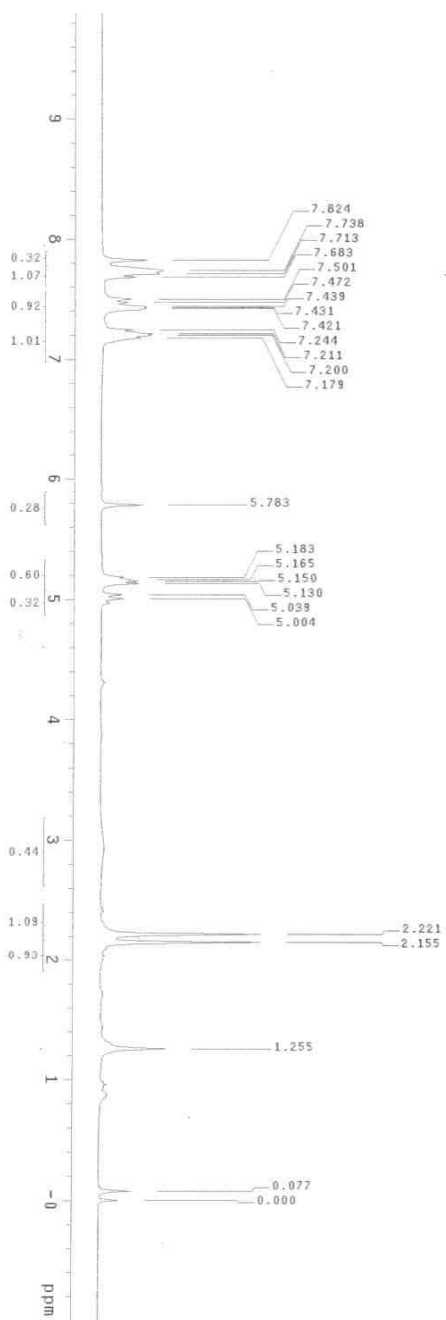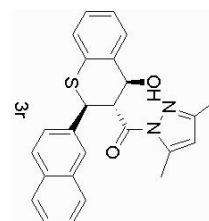

13-1-57b

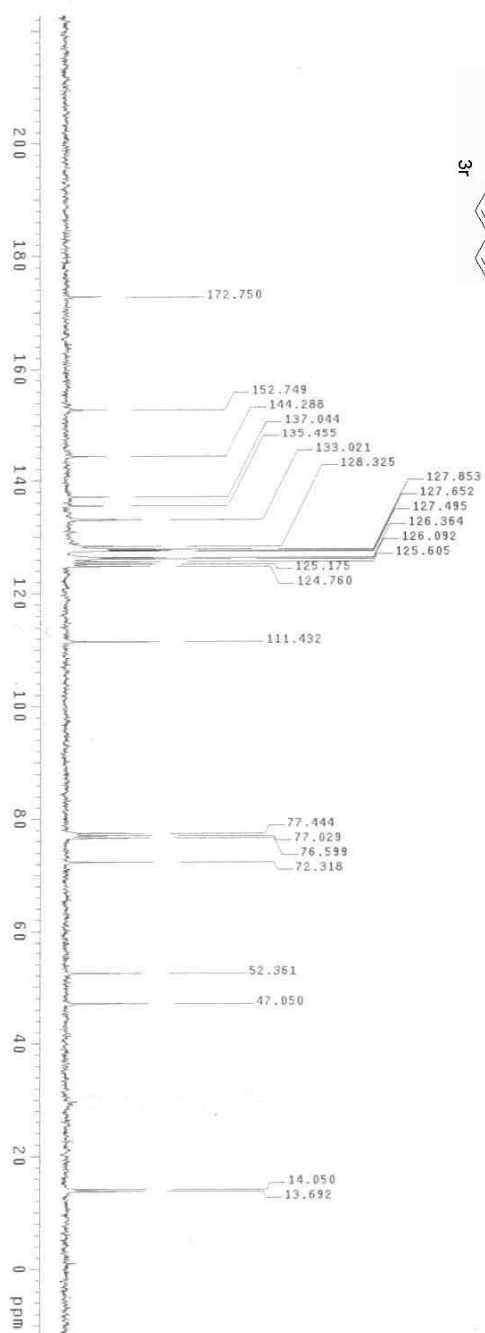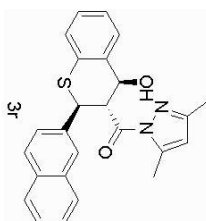

Solvent: CDCl<sub>3</sub>  
Ambient temperature  
Mercury-3000  
Relax. delay 1.000 sec  
Pulse 28.0 degrees  
Acq. time 0.500 sec  
Width 17699.1 Hz  
F2 (nu1) 125.761 MHz  
OBSERVE C13 75.4554684 MHz  
DECUPLE H1, 300.0815382 MHz  
Power 40 dB  
Cont. (nu1) 125.761 MHz  
Cont. (nu2) 300.0815382 MHz  
DATA PROCESSING  
Line broadening 4.0 Hz  
FT size 32768  
Total time 2 hr, 24 min, 23 sec

C131J-1-57b

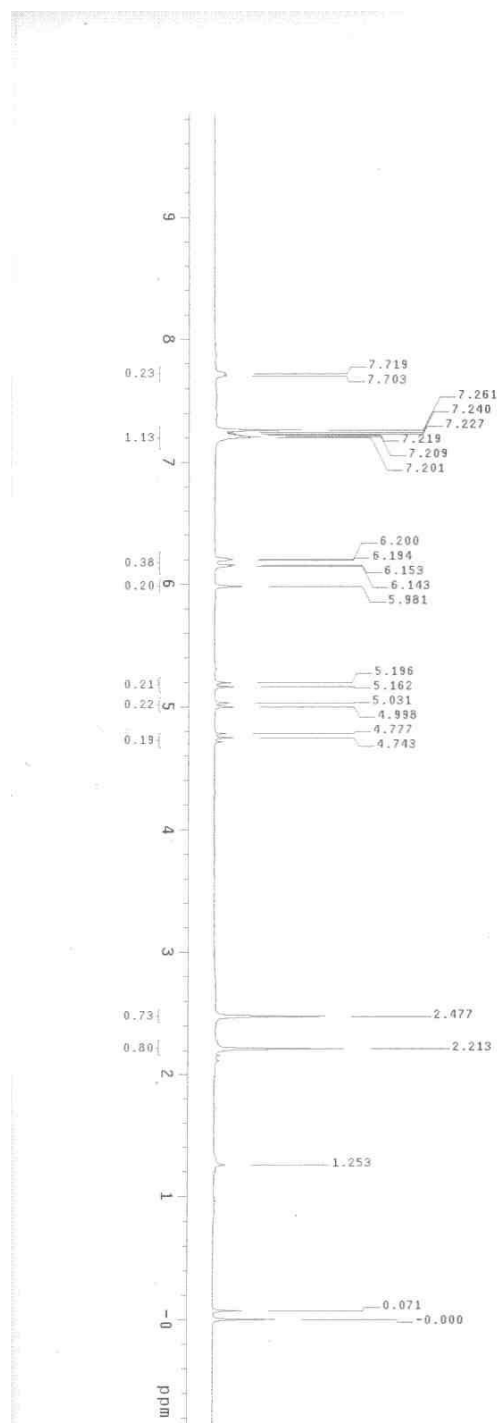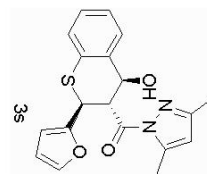

14-1-100

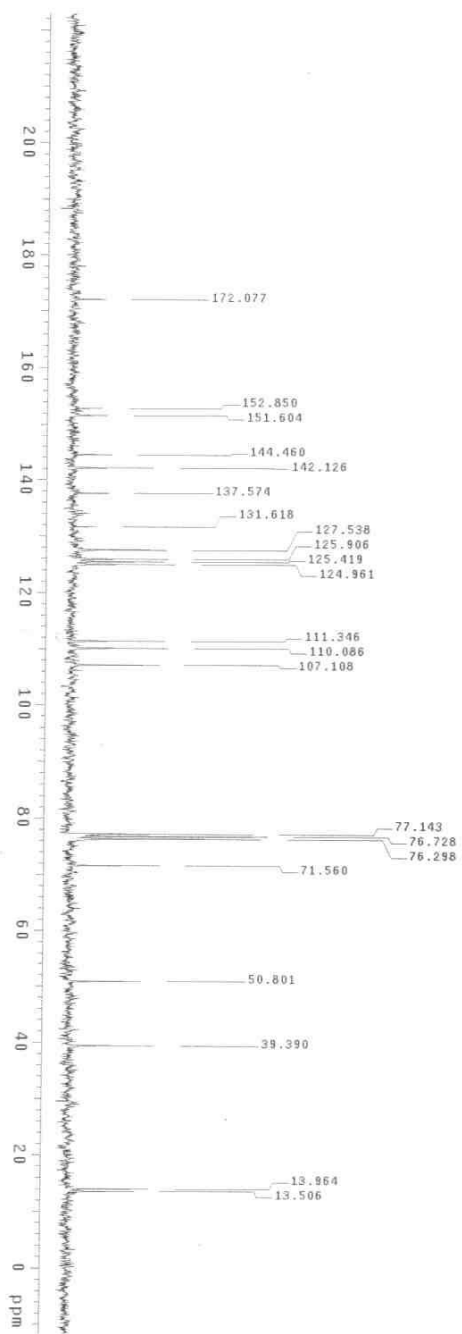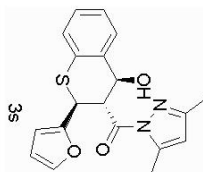

Solvent: CDCl<sub>3</sub>  
Ambient temperature  
Mercury-300B (mercury300)  
Relax. delay 1.000 sec  
Pulse 28.0 degrees  
Acq. time 0.500 sec  
Width 17899.1 Hz  
AQ 0.000 sec  
OBSERVE C13 75.4554705 MHz  
DECOUPLE H1 300.0815382 MHz  
Power 40 db  
MULTIPROUSE ON  
MULTISCAN 128  
Line broadening 4.0 Hz  
DATA PROCESSING  
FT size 32768  
Total time 2 hr , 24 min, 23 sec

C13H-1-10b



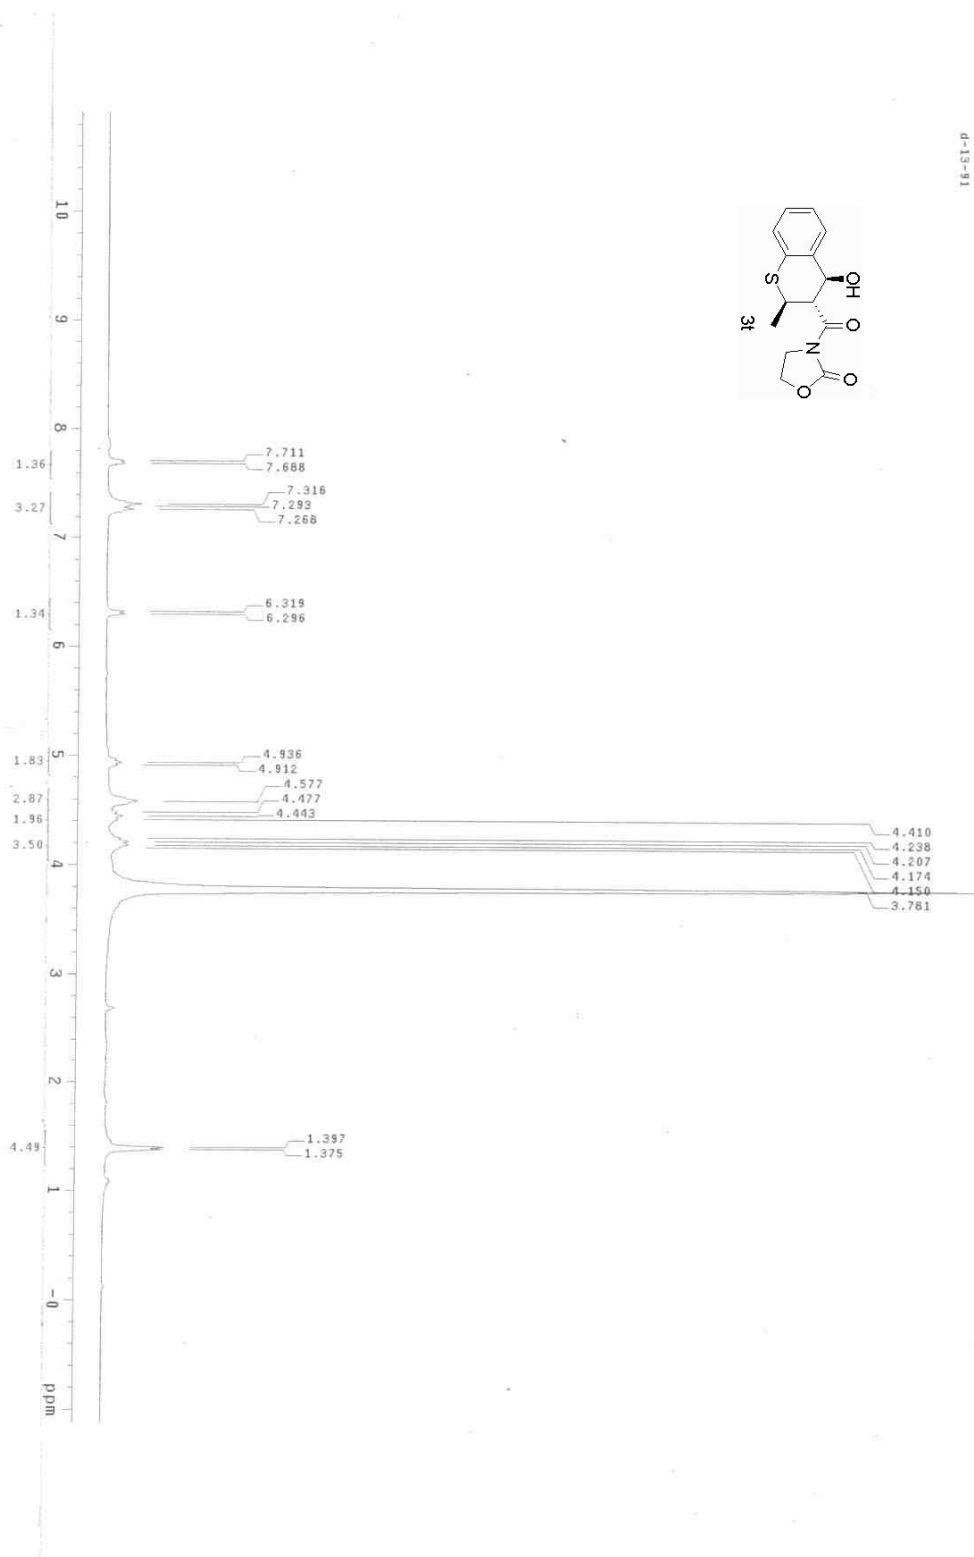

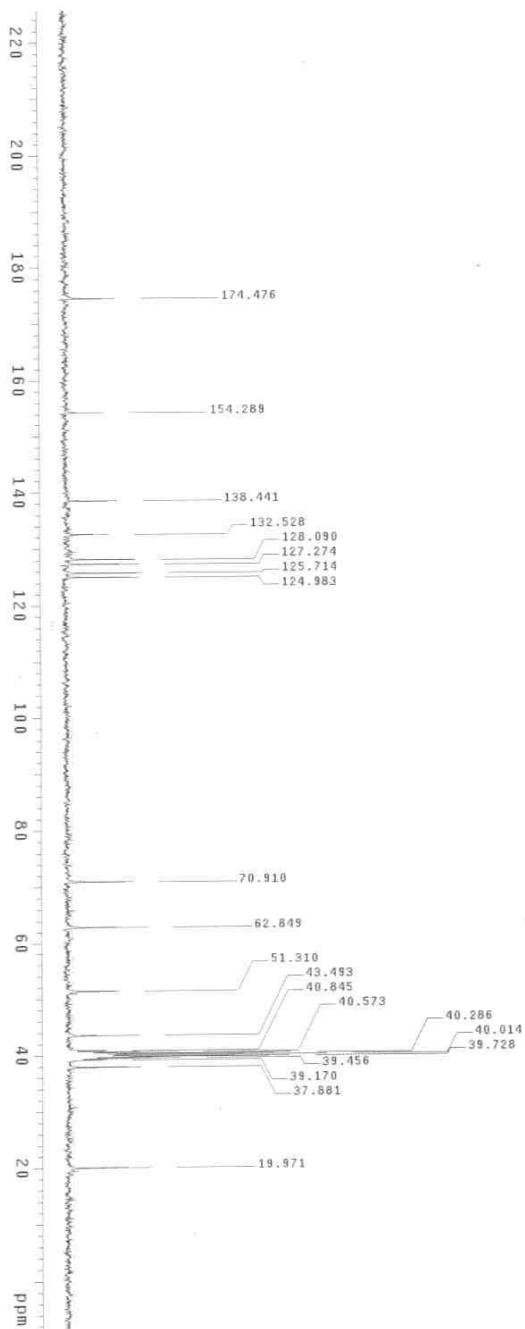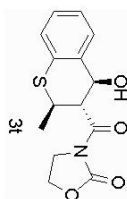

0x4-C-120104  
Solvent: DMSO  
Ambient temperature  
Mercury-3000B "mercury3000"  
Relax: delay 1.000 sec  
Pulse: 28.0 degrees  
Acq: 1.000 sec  
Width: 1769.1 Hz  
128 Repetitions  
OBSERVE: C13, 75.4536134 MHz  
DECODE: C13, 500.1083276 MHz  
SFO: 500.1362768 MHz  
CONTINUOUSLY on  
WALTZ-16 modulated  
DATA PROCESSING  
F1: 75.4536134 MHz  
F2: 500.1083276 MHz  
Total time: 14 min, 27 sec

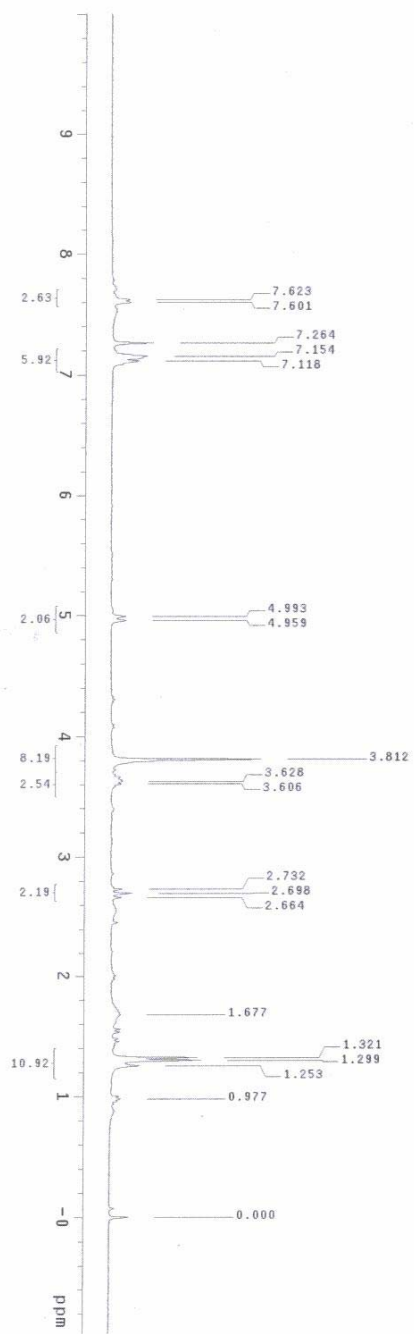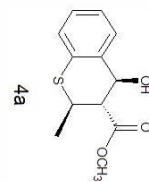

D-13-137b

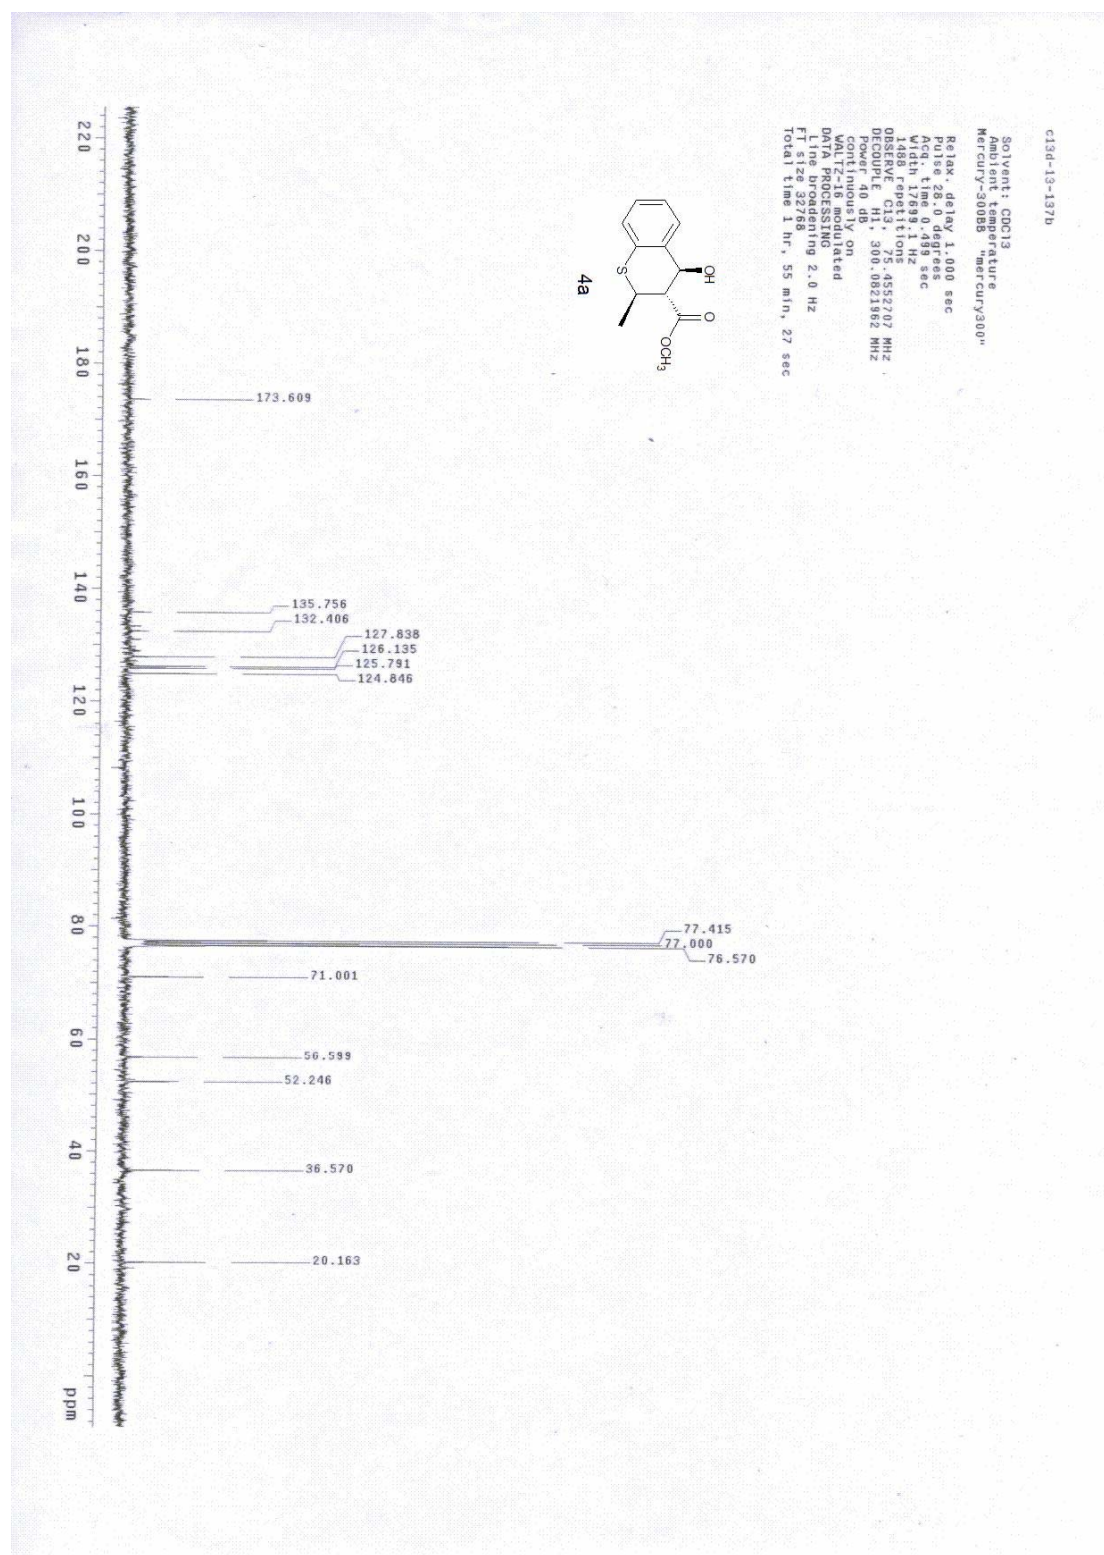

## VIII. HPLC Chromatograms

Data File D:\LC\FX\DATA\FX-4-18B\FX-4-18B-9 2011-09-27 16-33-09\012-0201.D  
Sample Name: FX-4-18b

```
=====
Acq. Operator   : FX                               Seq. Line :    2
Acq. Instrument : Instrument 1                     Location  : Vial 12
Injection Date  : 9/27/2011 4:45:40 PM           Inj       :    1
                                                    Inj Volume: 5 µl
Acq. Method     : D:\LC\FX\Data\FX-4-18B\FX-4-18B-9 2011-09-27 16-33-09\ASH-10-90-05ML-
254NM.M
Last changed    : 9/27/2011 5:21:15 PM by FX
                (modified after loading)
Analysis Method : D:\LC\FX\DATA\FX-4-18B\FX-4-18B-9 2011-09-27 16-33-09\012-0201.D\DA.M (
ASH-10-90-05ML-254NM.M)
Last changed    : 10/5/2011 10:36:42 PM by dxq
                (modified after loading)
=====
```

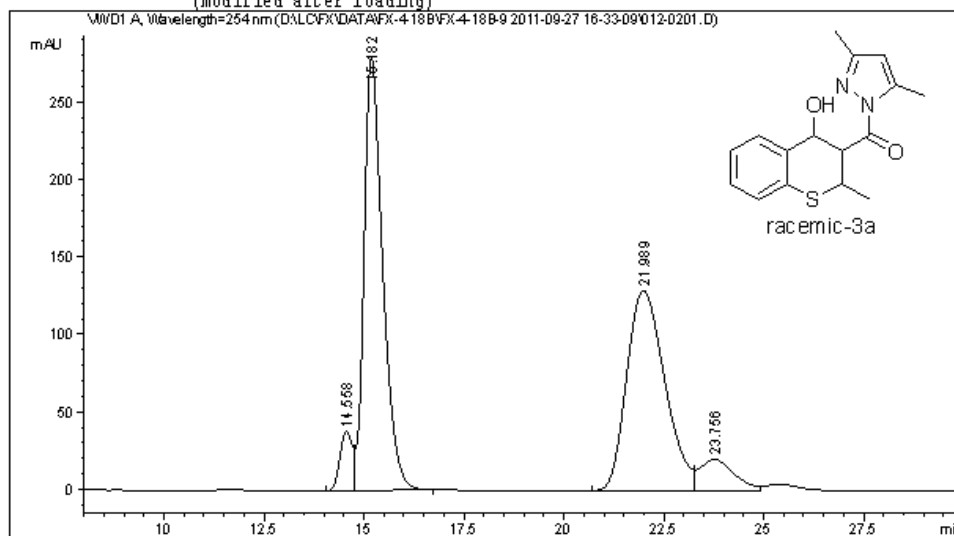

### Area Percent Report

```
Sorted By      : Signal
Multiplier     : 1.0000
Dilution       : 1.0000
Use Multiplier & Dilution Factor with ISTDs
```

Signal 1: VMD1 A, Wavelength=254 nm

| Peak # | RetTime [min] | Type | Width [min] | Area mAU*s | Height [mAU] | Area %  |
|--------|---------------|------|-------------|------------|--------------|---------|
| 1      | 14.558        | BV   | 0.3377      | 826.58118  | 37.85433     | 4.2004  |
| 2      | 15.182        | VB   | 0.4909      | 9070.29004 | 279.33612    | 46.0916 |
| 3      | 21.989        | BV   | 1.0405      | 8588.54590 | 129.20874    | 43.6435 |
| 4      | 23.756        | WV   | 0.8653      | 1193.43799 | 20.24796     | 6.0646  |

Totals : 1.96789e4 466.64716

Instrument 1 10/5/2011 10:36:46 PM dxq

Page 1 of 2

Data File D:\LC\FX\DATA\FX-4-48CDEH\FX-4-48CDEH 2011-10-05 18-19-53\002-0201.D  
 Sample Name: FX-4-48Cb

```

=====
Acq. Operator   : FX                               Seq. Line :    2
Acq. Instrument : Instrument 1                     Location  : Vial 2
Injection Date  : 10/5/2011 6:32:27 PM           Inj       :    1
                                                    Inj Volume: 5 µl
Acq. Method     : D:\LC\FX\Data\FX-4-48CDEH\FX-4-48CDEH 2011-10-05 18-19-53\ASH-10-90-05ML-
254NM-30MIN.M
Last changed    : 9/28/2011 11:47:06 AM by thl
Analysis Method : D:\LC\FX\DATA\FX-4-48CDEH\FX-4-48CDEH 2011-10-05 18-19-53\002-0201.D\DA.M
(ASH-10-90-05ML-254NM-30MIN.M)
Last changed    : 10/5/2011 10:33:39 PM by dxq
(modified after loading)
    
```

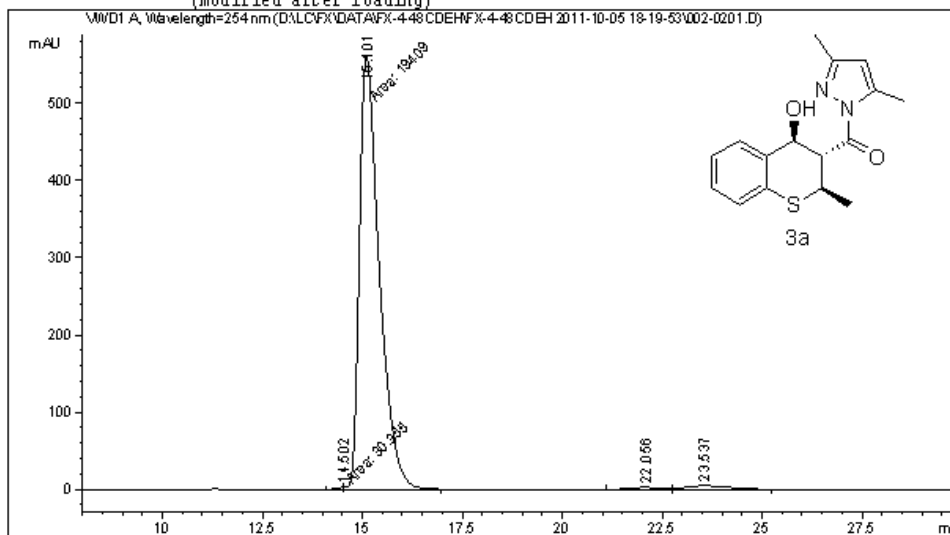

Area Percent Report

```

=====
Sorted By      : Signal
Multiplier     : 1.0000
Dilution       : 1.0000
Use Multiplier & Dilution Factor with ISTDs
    
```

Signal 1: WVD1 A, Wavelength=254 nm

| Peak # | RetTime [min] | Type | Width [min] | Area mAU  | Area %  | Height [mAU] | Area %  |
|--------|---------------|------|-------------|-----------|---------|--------------|---------|
| 1      | 14.502        | MF   | 0.1865      | 30.35498  | 0.1522  | 2.71309      | 0.1522  |
| 2      | 15.101        | FM   | 0.5769      | 1.94090e4 | 97.2966 | 560.69159    | 97.2966 |
| 3      | 22.056        | BV   | 0.7669      | 157.12704 | 0.7877  | 2.63550      | 0.7877  |
| 4      | 23.537        | VB   | 0.9386      | 351.79373 | 1.7635  | 4.76448      | 1.7635  |

Totals : 1.99483e4 570.80466

Instrument 1 10/5/2011 10:33:44 PM dxq

Page 1 of 2

Data File D:\LC\FX\DATA\FX-4-60AB\FX-4-60AB-2 2011-10-12 17-12-37\051-0201.D  
Sample Name: FX-4-60Ab

```
=====
Acq. Operator   : FX                               Seq. Line :    2
Acq. Instrument : Instrument 1                     Location  : Vial 51
Injection Date  : 10/12/2011 5:25:29 PM           Inj       :    1
                                                    Inj Volume: 5 µl
Acq. Method     : D:\LC\FX\Data\FX-4-60AB\FX-4-60AB-2 2011-10-12 17-12-37\ADH-10-90-IML-
254NM.M
Last changed    : 10/12/2011 5:44:42 PM by FX
(modified after loading)
Analysis Method : D:\LC\FX\DATA\FX-4-60AB\FX-4-60AB-2 2011-10-12 17-12-37\051-0201.D\DA.M (
ADH-10-90-IML-254NM.M)
Last changed    : 10/13/2011 12:04:17 PM by FX
(modified after loading)
=====
```

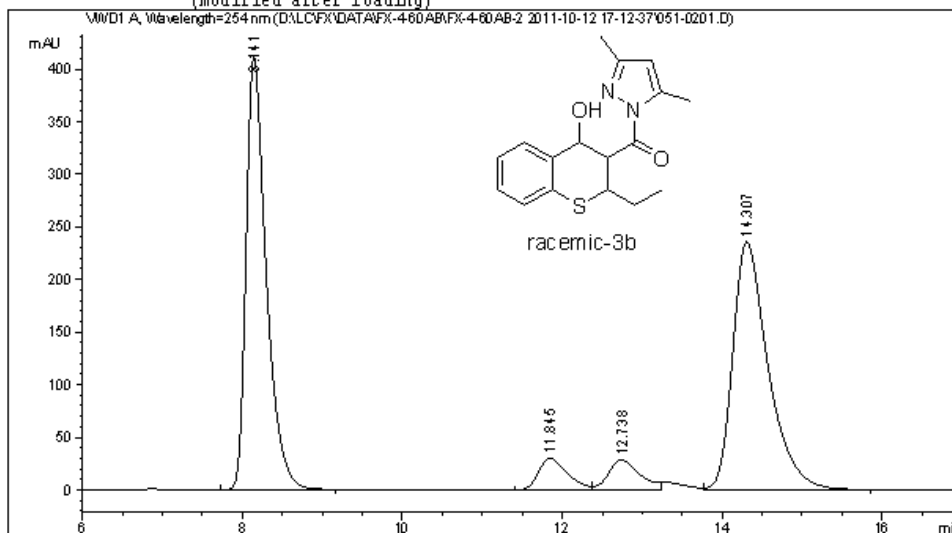

=====  
Area Percent Report  
=====

Sorted By : Signal  
Multiplier : 1.0000  
Dilution : 1.0000  
Use Multiplier & Dilution Factor with ISTDs

Signal 1: VWD1 A, Wavelength=254 nm

| Peak # | RetTime [min] | Type | Width [min] | Area mAU *s | Height [mAU] | Area %  |
|--------|---------------|------|-------------|-------------|--------------|---------|
| 1      | 8.141         | BB   | 0.2605      | 7189.43945  | 411.68027    | 45.0744 |
| 2      | 11.845        | BV   | 0.3717      | 753.37109   | 30.44006     | 4.7233  |
| 3      | 12.738        | WV   | 0.4040      | 776.10846   | 28.60009     | 4.8658  |
| 4      | 14.307        | VB   | 0.4583      | 7231.22803  | 235.79341    | 45.3364 |

Totals : 1.59501e4 706.51383

Instrument 1 10/13/2011 12:04:21 PM FX

Page 1 of 2

Data File D:\LC\FX\DATA\FX-4-65\FX-4-65AB 2011-10-16 17-05-17\071-0101.D  
Sample Name: fx-4-65ab

```
=====
Acq. Operator   : dxq                      Seq. Line :    1
Acq. Instrument : Instrument 1              Location  : Vial 71
Injection Date  : 10/16/2011 5:06:30 PM    Inj       :    1
                                           Inj Volume: 5 µl

Acq. Method     : D:\LC\FX\Data\FX-4-65\FX-4-65AB 2011-10-16 17-05-17\ADH-10-90-IML-254NM.M
Last changed    : 10/16/2011 5:06:40 PM by dxq
                 (modified after loading)
Analysis Method : D:\LC\FX\DATA\FX-4-65\FX-4-65AB 2011-10-16 17-05-17\071-0101.D\DA.M (ADH-
10-90-IML-254NM.M)
Last changed    : 10/18/2011 3:18:36 PM by FX
                 (modified after loading)
=====
```

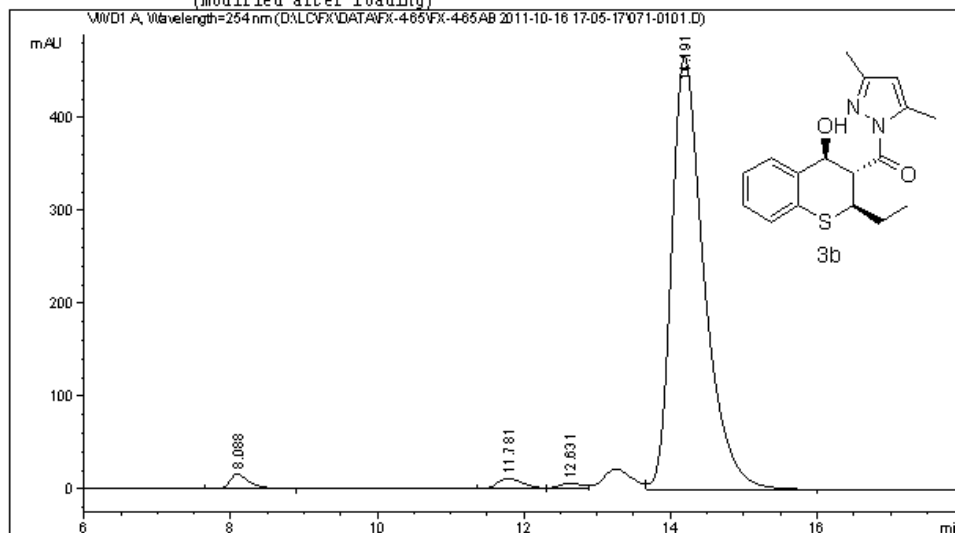

=====  
Area Percent Report  
=====

Sorted By : Signal  
Multiplier : 1.0000  
Dilution : 1.0000  
Use Multiplier & Dilution Factor with ISTDs

Signal 1: VMD1 A, Wavelength=254 nm

| Peak #   | RetTime [min] | Type | Width [min] | Area mAU  | Area *s | Height [mAU] | Area %  |
|----------|---------------|------|-------------|-----------|---------|--------------|---------|
| 1        | 8.088         | BE   | 0.2755      | 308.92929 |         | 16.36662     | 2.0444  |
| 2        | 11.781        | BV   | 0.3713      | 289.13525 |         | 11.75995     | 1.9134  |
| 3        | 12.631        | WV   | 0.3463      | 151.49113 |         | 6.67530      | 1.0025  |
| 4        | 14.191        | VB   | 0.4594      | 1.43614e4 |         | 466.79181    | 95.0396 |
| Totals : |               |      |             | 1.51109e4 |         | 501.59369    |         |

Instrument 1 10/18/2011 3:18:40 PM FX

Page 1 of 2



Data File D:\LC\FX\DATA\FX-4-63-64AB\FX-4-63-64AB-1 2011-10-14 14-23-40\053-0301.D  
 Sample Name: FX-4-63AB

```

=====
Acq. Operator   : FX                               Seq. Line :    3
Acq. Instrument : Instrument 1                     Location  : Vial 53
Injection Date  : 10/14/2011 2:58:47 PM          Inj       :    1
                                                Inj Volume: 5 µl

Acq. Method     : D:\LC\FX\DATA\FX-4-63-64AB\FX-4-63-64AB-1 2011-10-14 14-23-40\0JH-10-90-
05ML-254NM.M
Last changed    : 10/14/2011 3:33:23 PM by FX
(modified after loading)
Analysis Method : D:\LC\FX\DATA\FX-4-63-64AB\FX-4-63-64AB-1 2011-10-14 14-23-40\053-0301.D\
D.A.M (0JH-10-90-05ML-254NM.M)
Last changed    : 10/18/2011 3:12:38 PM by FX
(modified after loading)
    
```

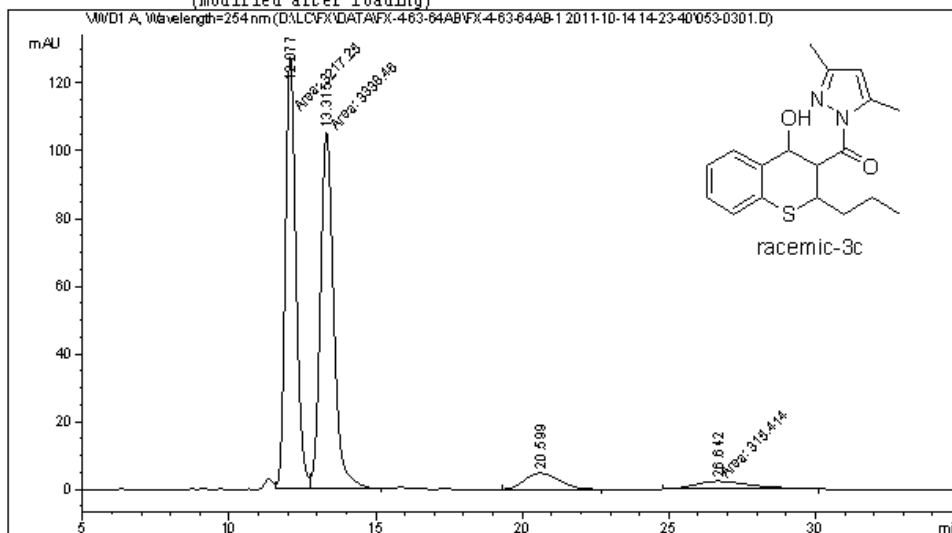

Area Percent Report

```

Sorted By      : Signal
Multiplier     : 1.0000
Dilution      : 1.0000
Use Multiplier & Dilution Factor with ISTDs
    
```

Signal 1: VWD1 A, Wavelength=254 nm

| Peak # | RetTime [min] | Type | Width [min] | Area mAU*s | Height [mAU] | Area %  |
|--------|---------------|------|-------------|------------|--------------|---------|
| 1      | 12.077        | FM   | 0.4198      | 3217.25391 | 127.73701    | 44.2871 |
| 2      | 13.315        | FM   | 0.5287      | 3338.45825 | 105.24897    | 45.9555 |
| 3      | 20.599        | BB   | 0.9790      | 393.42123  | 4.73783      | 5.4156  |
| 4      | 26.642        | MM   | 2.2470      | 315.41403  | 2.33952      | 4.3418  |

Totals : 7264.54742 240.06333

Instrument 1 10/18/2011 3:12:42 PM FX

Page 1 of 2

Data File D:\LC\FX\DATA\FX-4-65\FX-4-65BBCE 2011-10-16 17-36-56\072-0101.D  
Sample Name: fx-4-65bb

```
=====
Acq. Operator   : dxq                               Seq. Line :    1
Acq. Instrument : Instrument 1                       Location  : Vial 72
Injection Date  : 10/16/2011 5:38:15 PM             Inj       :    1
                                                    Inj Volume: 5 µl

Acq. Method     : D:\LC\FX\Data\FX-4-65\FX-4-65BBCE 2011-10-16 17-36-56\0JH-10-90-05ML-
254NM-30MIN.M
Last changed    : 10/16/2011 6:07:48 PM by dxq
                  (modified after loading)
Analysis Method : D:\LC\FX\DATA\FX-4-65\FX-4-65BBCE 2011-10-16 17-36-56\072-0101.D\DA.M (
0JH-10-90-05ML-254NM-30MIN.M)
Last changed    : 10/18/2011 3:22:15 PM by FX
                  (modified after loading)
=====
```

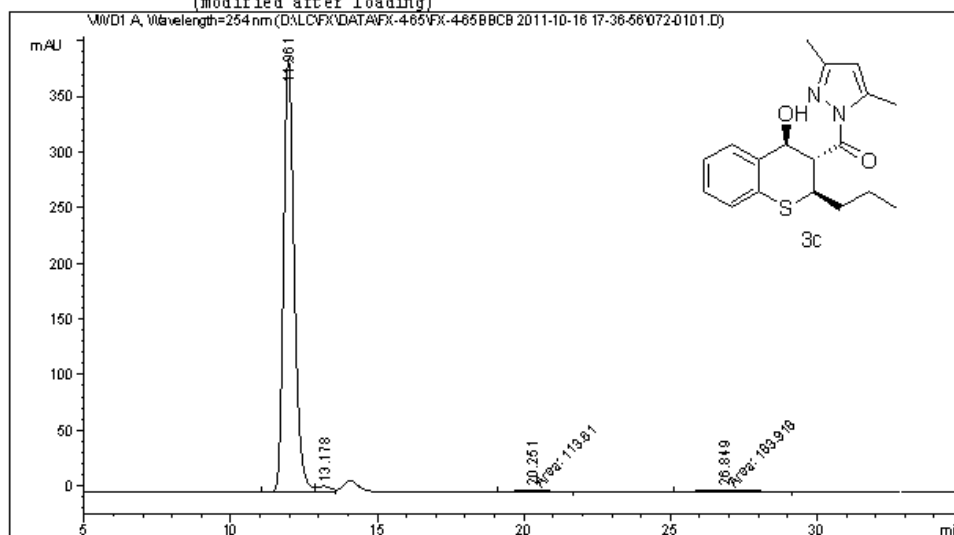

=====  
Area Percent Report  
=====

Sorted By : Signal  
Multiplier : 1.0000  
Dilution : 1.0000  
Use Multiplier & Dilution Factor with ISTDs

Signal 1: VWD1 A, Wavelength=254 nm

| Peak # | RetTime [min] | Type | Width [min] | Area mAU*s | Height [mAU] | Area %  |
|--------|---------------|------|-------------|------------|--------------|---------|
| 1      | 11.961        | BV   | 0.3876      | 9824.30566 | 389.35544    | 95.5955 |
| 2      | 13.178        | W    | 0.4606      | 155.11661  | 4.90540      | 1.5094  |
| 3      | 20.251        | MM   | 1.1559      | 113.60997  | 1.63817      | 1.1055  |
| 4      | 26.849        | MM   | 1.9839      | 183.91774  | 1.54506      | 1.7896  |

Totals : 1.02769e4 397.44407

Instrument 1 10/18/2011 3:22:19 PM FX

Page 1 of 2

Data File D:\LC\201110\FX\FX-4-72AB\FX-4-72AB-2 2011-10-21 17-12-06\021-0101.D  
Sample Name: FX-4-72Ab

```
=====
Acq. Operator   : FX                               Seq. Line :    1
Acq. Instrument : Instrument 1                     Location  : Vial 21
Injection Date  : 10/21/2011 5:13:38 PM           Inj       :    1
                                                    Inj Volume: 5 µl
Acq. Method     : D:\LC\201110\FX\FX-4-72AB\FX-4-72AB-2 2011-10-21 17-12-06\ADH-10-90-IML-
254NM.M
Last changed    : 9/27/2011 1:52:39 PM by THL
Analysis Method : D:\LC\201110\FX\FX-4-72AB\FX-4-72AB-2 2011-10-21 17-12-06\021-0101.D\DA.M
(ADH-10-90-IML-254NM.M)
Last changed    : 10/21/2011 5:43:09 PM by HZL
(modified after loading)
=====
```

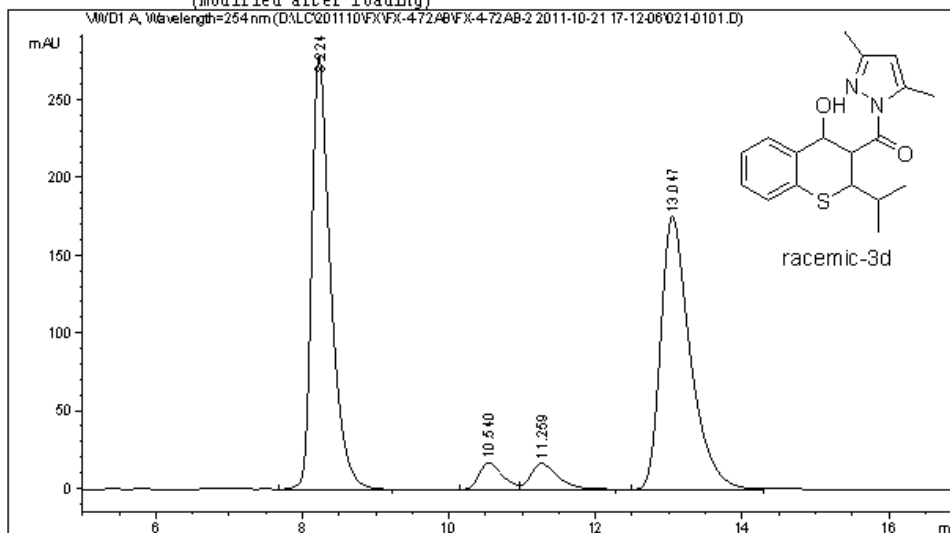

=====  
Area Percent Report  
=====

Sorted By : Signal  
Multiplier : 1.0000  
Dilution : 1.0000  
Use Multiplier & Dilution Factor with ISTDs

Signal 1: WWD1 A, Wavelength=254 nm

| Peak # | RetTime [min] | Type | Width [min] | Area mAU   | Height [mAU] | Area %  |
|--------|---------------|------|-------------|------------|--------------|---------|
| 1      | 8.224         | VB   | 0.2653      | 4981.61133 | 278.70477    | 46.4797 |
| 2      | 10.540        | BV   | 0.3283      | 380.28021  | 17.46513     | 3.5481  |
| 3      | 11.259        | VB   | 0.3842      | 436.08261  | 16.72797     | 4.0688  |
| 4      | 13.047        | BB   | 0.4187      | 4919.84131 | 175.52832    | 45.9034 |

Totals : 1.07178e4 488.42619

Instrument 1 10/21/2011 5:43:13 PM HZL

Page 1 of 2

Data File D:\LC\201110\FX\FX-4-72BB\FX-4-72BB 2011-10-21 17-40-46\022-0101.D  
 Sample Name: FX-4-72Bb

```

=====
Acq. Operator   : FX                               Seq. Line :    1
Acq. Instrument : Instrument 1                     Location  : Vial 22
Injection Date  : 10/21/2011 5:42:36 PM          Inj       :    1
                                                    Inj Volume: 5 µl
Acq. Method     : D:\LC\201110\FX\FX-4-72BB\FX-4-72BB 2011-10-21 17-40-46\ADH-10-90-IML-
254NM.M
Last changed    : 10/21/2011 5:45:16 PM by FX
(modified after loading)
Analysis Method : D:\LC\201110\FX\FX-4-72BB\FX-4-72BB 2011-10-21 17-40-46\022-0101.D\DA.M (
ADH-10-90-IML-254NM.M)
Last changed    : 10/22/2011 1:27:55 PM by FX
(modified after loading)
    
```

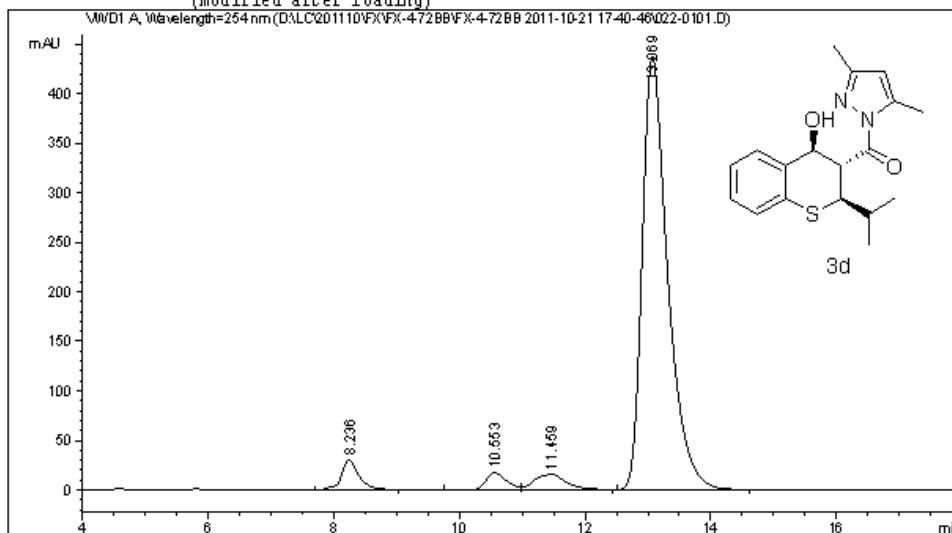

Area Percent Report

```

Sorted By      : Signal
Multiplier     : 1.0000
Dilution       : 1.0000
Use Multiplier & Dilution Factor with ISTDs
    
```

Signal 1: VWD1 A, Wavelength=254 nm

| Peak # | RetTime [min] | Type | Width [min] | Area mAU *s | Height [mAU] | Area %  |
|--------|---------------|------|-------------|-------------|--------------|---------|
| 1      | 8.236         | BB   | 0.2804      | 585.21027   | 30.53090     | 4.2252  |
| 2      | 10.553        | BV   | 0.3375      | 398.13519   | 17.64404     | 2.8745  |
| 3      | 11.459        | VB   | 0.5540      | 552.38464   | 15.61468     | 3.9882  |
| 4      | 13.069        | BB   | 0.4204      | 1.23147e4   | 437.13513    | 88.9121 |

Totals : 1.38504e4 500.92475

Instrument 1 10/22/2011 1:28:00 PM FX

Page 1 of 2

Data File D:\LC\FX\DATA\FX-4-63-64AB\FX-4-63-64AB-1 2011-10-14 14-23-40\054-0401.D  
Sample Name: FX-4-64AB

```
=====
Acq. Operator   : FX                               Seq. Line :    4
Acq. Instrument : Instrument 1                     Location  : Vial 54
Injection Date  : 10/14/2011 3:35:29 PM          Inj       :    1
                                                    Inj Volume: 5 µl
Acq. Method     : D:\LC\FX\DATA\FX-4-63-64AB\FX-4-63-64AB-1 2011-10-14 14-23-40\0JH-10-90-
05ML-254NM.M
Last changed    : 10/14/2011 4:02:38 PM by FX
(modified after loading)
Analysis Method : D:\LC\FX\DATA\FX-4-63-64AB\FX-4-63-64AB-1 2011-10-14 14-23-40\054-0401.D\
D.A.M (0JH-10-90-05ML-254NM.M)
Last changed    : 10/18/2011 3:15:33 PM by FX
(modified after loading)
=====
```

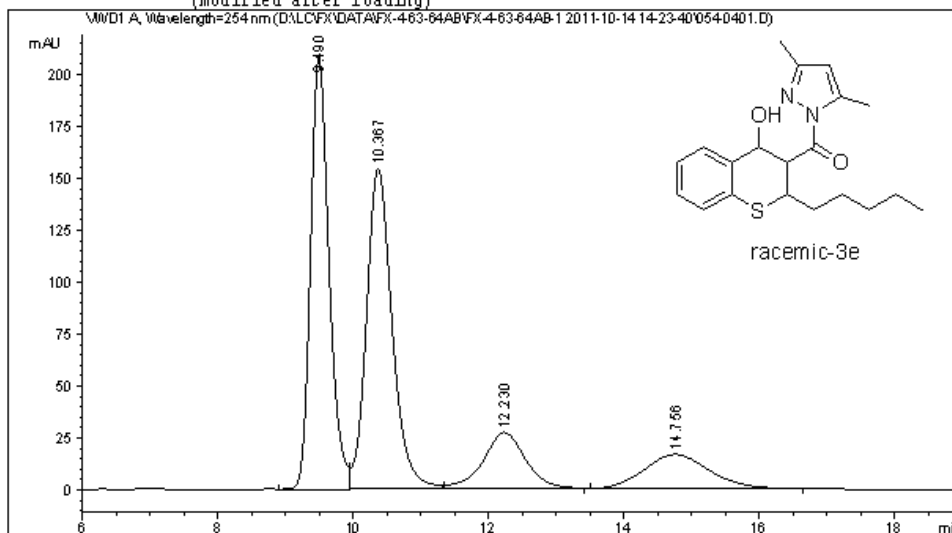

=====  
Area Percent Report  
=====

Sorted By : Signal  
Multiplier : 1.0000  
Dilution : 1.0000  
Use Multiplier & Dilution Factor with ISTDs

Signal 1: VWD1 A, Wavelength=254 nm

| Peak # | RetTime [min] | Type | Width [min] | Area mAU*s | Height [mAU] | Area %  |
|--------|---------------|------|-------------|------------|--------------|---------|
| 1      | 9.490         | WV   | 0.2905      | 3965.47144 | 208.28885    | 38.4115 |
| 2      | 10.367        | VB   | 0.4020      | 4066.07324 | 154.34161    | 39.3859 |
| 3      | 12.230        | BB   | 0.6497      | 1183.71899 | 27.07998     | 11.4661 |
| 4      | 14.756        | BB   | 0.9984      | 1108.40100 | 16.45676     | 10.7365 |

Totals : 1.03237e4 406.16720

Instrument 1 10/18/2011 3:15:37 PM FX

Page 1 of 2

Data File D:\LC\FX\DATA\FX-4-65\FX-4-65BBCB 2011-10-16 17-36-56\073-0201.D  
 Sample Name: fx-4-65cb

```

=====
Acq. Operator   : dxq                      Seq. Line :    2
Acq. Instrument : Instrument 1              Location  : Vial 73
Injection Date  : 10/16/2011 6:14:42 PM    Inj       :    1
                                           Inj Volume: 5 µl

Acq. Method     : D:\LC\FX\Data\FX-4-65\FX-4-65BBCB 2011-10-16 17-36-56\0JH-10-90-05ML-
254NM-20MIN.M
Last changed    : 10/16/2011 5:33:37 PM by dxq
Analysis Method : D:\LC\FX\DATA\FX-4-65\FX-4-65BBCB 2011-10-16 17-36-56\073-0201.D\A.M (
0JH-10-90-05ML-254NM-20MIN.M)
Last changed    : 10/18/2011 3:27:34 PM by FX
(modified after loading)
    
```

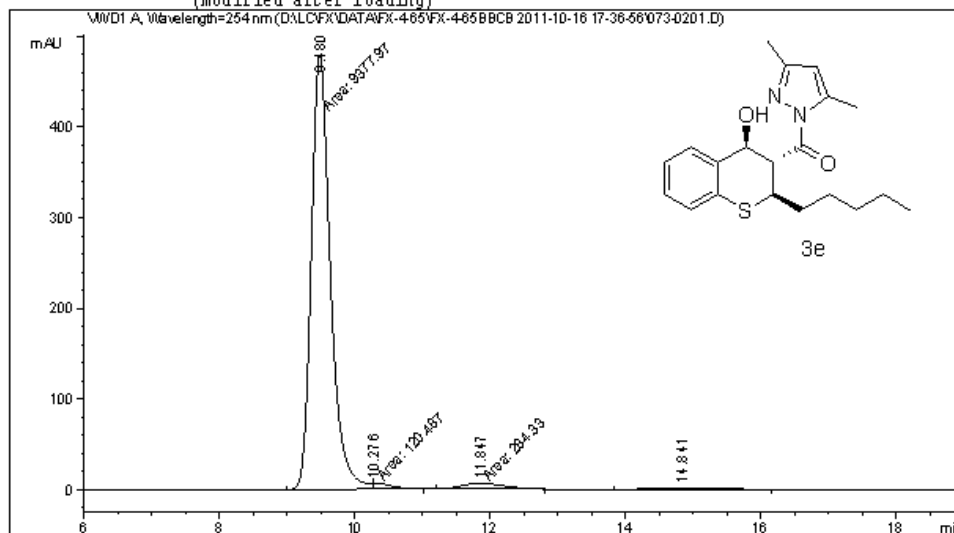

Area Percent Report

```

=====
Sorted By      : Signal
Multiplier     : 1.0000
Dilution       : 1.0000
Use Multiplier & Dilution Factor with ISTDs
    
```

Signal 1: VMD1 A, Wavelength=254 nm

| Peak #   | RetTime [min] | Type | Width [min] | Area mAU   | Height [mAU] | Area %  |
|----------|---------------|------|-------------|------------|--------------|---------|
| 1        | 9.480         | MF   | 0.3271      | 9377.97168 | 477.77005    | 94.5068 |
| 2        | 10.276        | FM   | 0.3087      | 120.48733  | 6.50533      | 1.2142  |
| 3        | 11.847        | MM   | 0.7489      | 284.33029  | 6.32756      | 2.8653  |
| 4        | 14.841        | BV   | 0.7969      | 140.27965  | 2.15204      | 1.4137  |
| Totals : |               |      |             | 9923.06895 | 492.75498    |         |

Instrument 1 10/18/2011 3:27:40 PM FX

Page 1 of 2



Data File D:\LC\201112\DXQ\DXQ-13-73\THL-12-76A 2011-12-18 17-11-30\071-0201.D  
 Sample Name: dxq-13-73c

```

=====
Acq. Operator   : thl                      Seq. Line :    2
Acq. Instrument : Instrument 1              Location  : Vial 71
Injection Date  : 12/18/2011 5:16:23 PM   Inj       :    1
                                           Inj Volume: 5 µl
Acq. Method     : D:\LC\201112\dxq\DXQ-13-73\THL-12-76A 2011-12-18 17-11-30\ADH-5-95-025ML-
235MM.M
Last changed    : 12/18/2011 5:16:48 PM by thl
                  (modified after loading)
Analysis Method : D:\LC\201112\DXQ\DXQ-13-73\THL-12-76A 2011-12-18 17-11-30\071-0201.D\DA.M
                  (ADH-5-95-025ML-235MM.M)
Last changed    : 12/18/2011 7:21:08 PM by thl
                  (modified after loading)
    
```

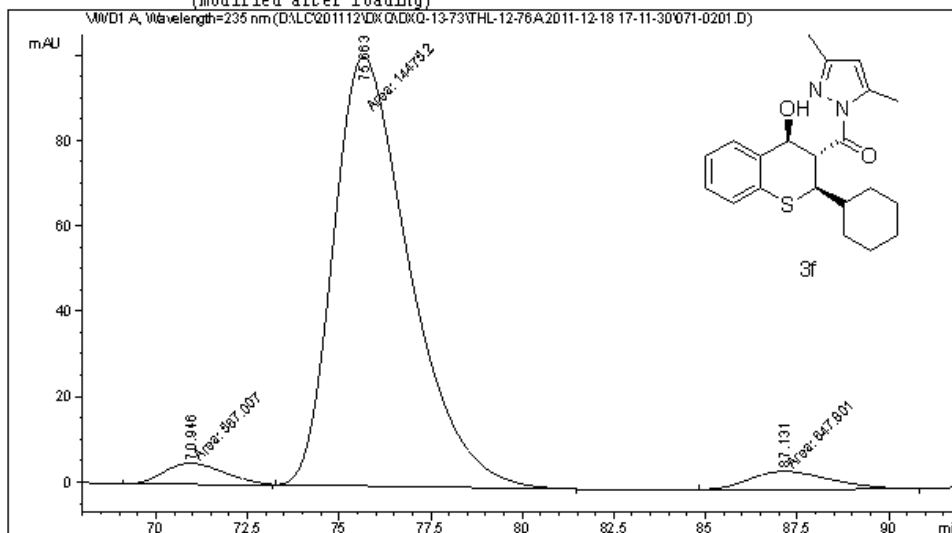

Area Percent Report

```

Sorted By      : Signal
Multiplier     : 1.0000
Dilution       : 1.0000
Use Multiplier & Dilution Factor with ISTDs
    
```

Signal 1: VWD1 A, Wavelength=235 nm

| Peak #   | RetTime [min] | Type | Width [min] | Area mAU  | Height [mAU] | Area %  |
|----------|---------------|------|-------------|-----------|--------------|---------|
| 1        | 70.946        | MM   | 1.9099      | 567.00677 | 4.94795      | 3.6138  |
| 2        | 75.663        | MM   | 2.3996      | 1.44752e4 | 100.53846    | 92.2574 |
| 3        | 87.131        | MM   | 2.5521      | 647.80060 | 4.23054      | 4.1288  |
| Totals : |               |      |             | 1.56900e4 | 109.71695    |         |

Instrument 1 12/18/2011 7:21:14 PM thl

Page 1 of 2









Data File D:\LC\201110\FX\FX-4-77\FX-4-77 2011-10-24 20-55-15\034-0101.D  
 Sample Name: FX-4-77Ab

```

=====
Acq. Operator   : FX                               Seq. Line :    1
Acq. Instrument : Instrument 1                     Location  : Vial 34
Injection Date  : 10/24/2011 8:56:34 PM           Inj       :    1
                                                    Inj Volume: 5 µl

Acq. Method     : D:\LC\201110\FX\FX-4-77\FX-4-77 2011-10-24 20-55-15\ASH-10-90-05ML-254NM-
30MIN.M
Last changed    : 9/28/2011 11:47:06 AM by thl
Analysis Method : D:\LC\201110\FX\FX-4-77\FX-4-77 2011-10-24 20-55-15\034-0101.D\DA.M (ASH-
10-90-05ML-254NM-30MIN.M)
Last changed    : 10/25/2011 1:44:07 PM by FX
                  (modified after loading)
    
```

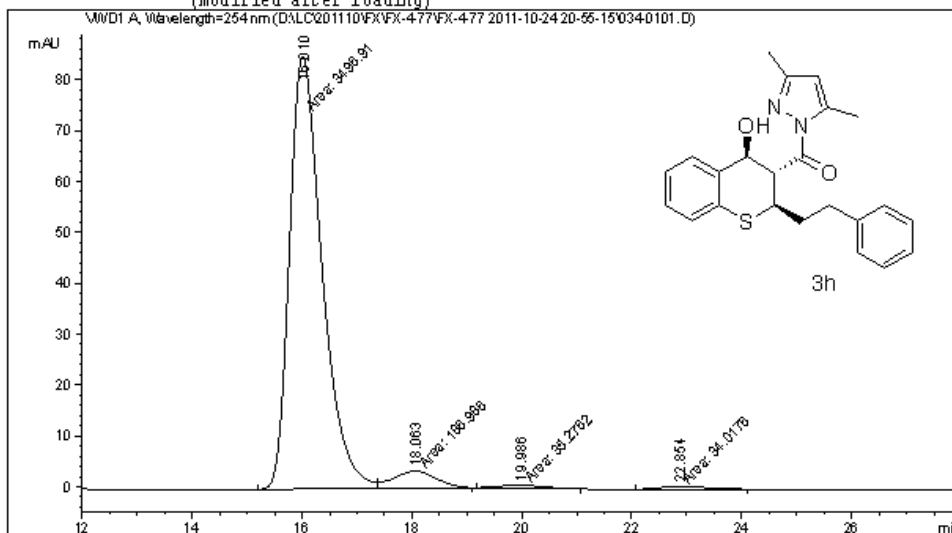

Area Percent Report

```

=====
Sorted By      :      Signal
Multiplier     :      1.0000
Dilution       :      1.0000
Use Multiplier & Dilution Factor with ISTDs
    
```

Signal 1: VMD1 A, Wavelength=254 nm

| Peak # | RetTime [min] | Type | Width [min] | Area mAU   | Height [mAU] | Area %  |
|--------|---------------|------|-------------|------------|--------------|---------|
| 1      | 16.010        | MF   | 0.6851      | 3496.90649 | 85.07250     | 93.1717 |
| 2      | 18.063        | FM   | 0.9061      | 186.98566  | 3.43938      | 4.9821  |
| 3      | 19.986        | MM   | 1.0157      | 35.27618   | 5.78854e-1   | 0.9399  |
| 4      | 22.854        | MM   | 1.0103      | 34.01763   | 5.61163e-1   | 0.9064  |

Totals : 3753.18596 89.65190

Instrument 1 10/25/2011 1:44:11 PM FX

Page 1 of 2

Data File D:\LC\201110\FX\FX-4-78B\FX-4-78B 2011-10-25 11-55-52\025-0101.D  
 Sample Name: FX-4-78b

```

=====
Acq. Operator   : hzl                      Seq. Line :    1
Acq. Instrument : Instrument 1              Location  : Vial 25
Injection Date  : 10/25/2011 11:57:30 AM   Inj       :    1
                                           Inj Volume: 5 µl
Acq. Method     : D:\LC\201110\FX\FX-4-78B\FX-4-78B 2011-10-25 11-55-52\0JH-10-90-1ML-254MM.
M
Last changed    : 10/25/2011 12:12:48 PM by hzl
                  (modified after loading)
Analysis Method : D:\LC\201110\FX\FX-4-78B\FX-4-78B 2011-10-25 11-55-52\025-0101.D\DA.M (
0JH-10-90-1ML-254MM.M)
Last changed    : 10/25/2011 1:49:22 PM by FX
                  (modified after loading)
    
```

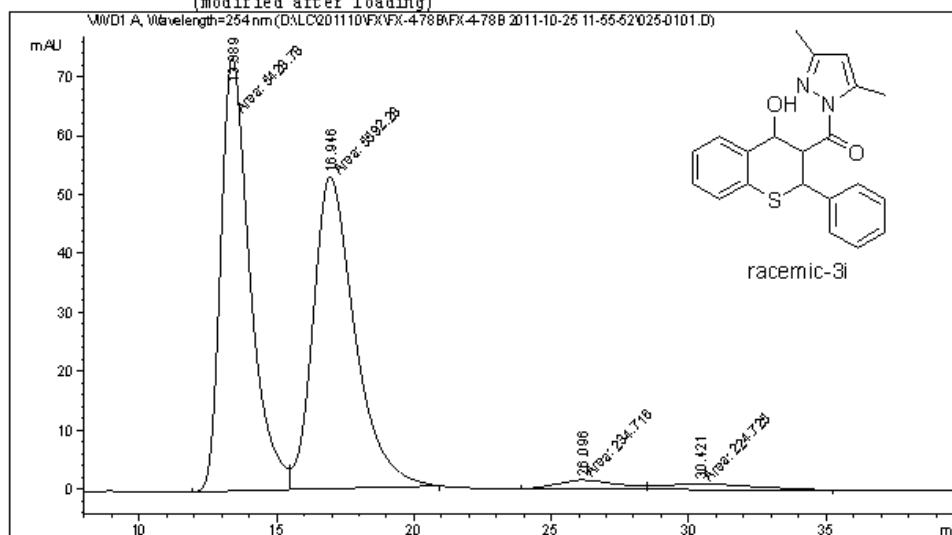

Area Percent Report

```

Sorted By      : Signal
Multiplier     : 1.0000
Dilution      : 1.0000
Use Multiplier & Dilution Factor with ISTDs
    
```

Signal 1: VMD1 A, Wavelength=254 nm

| Peak # | RetTime [min] | Type | Width [min] | Area mAU*s | Height [mAU] | Area %  |
|--------|---------------|------|-------------|------------|--------------|---------|
| 1      | 13.389        | MF   | 1.2321      | 5428.77588 | 73.43800     | 47.2869 |
| 2      | 16.946        | FM   | 1.7612      | 5592.28076 | 52.92031     | 48.7111 |
| 3      | 26.096        | MF   | 2.5482      | 234.71635  | 1.53520      | 2.0445  |
| 4      | 30.421        | FM   | 3.8967      | 224.72464  | 9.61171e-1   | 1.9574  |

Totals : 1.14805e4 128.85469

Instrument 1 10/25/2011 1:49:26 PM FX

Page 1 of 2

Data File D:\LC\201110\FX\FX-4-78B\FX-4-78B 2011-10-25 11-55-52\026-0201.D  
 Sample Name: FX-4-77Cb

```

=====
Acq. Operator   : hzl                      Seq. Line :    2
Acq. Instrument : Instrument 1              Location  : Vial 26
Injection Date  : 10/25/2011 12:58:45 PM   Inj       :    1
                                           Inj Volume: 5 µl
Acq. Method     : D:\LC\201110\FX\FX-4-78B\FX-4-78B 2011-10-25 11-55-52\0JH-10-90-1ML-254NM.M
                                           M
Last changed    : 10/25/2011 1:46:30 PM by hzl
                  (modified after loading)
Analysis Method : D:\LC\201110\FX\FX-4-78B\FX-4-78B 2011-10-25 11-55-52\026-0201.D\DA.M (
                  0JH-10-90-1ML-254NM.M)
Last changed    : 10/25/2011 2:03:36 PM by FX
                  (modified after loading)
    
```

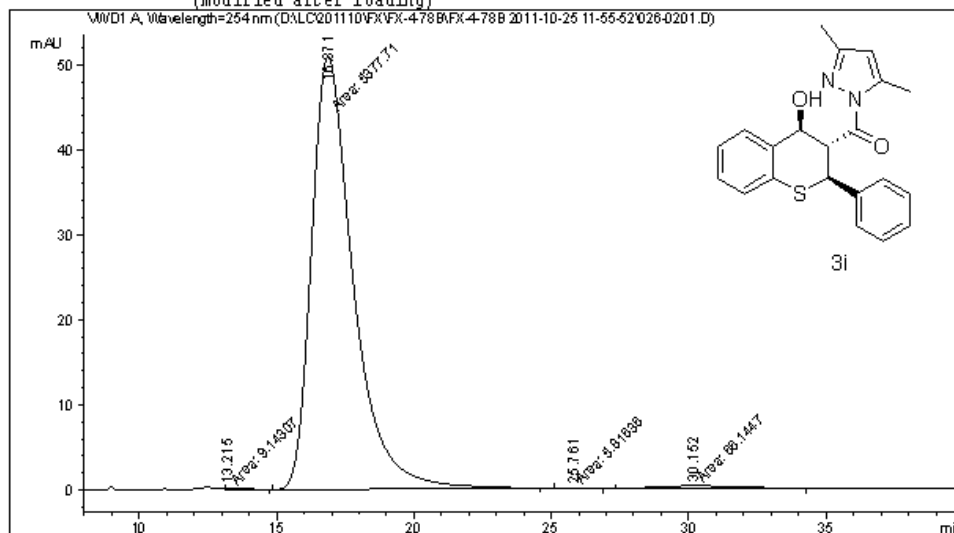

Area Percent Report

```

Sorted By      : Signal
Multiplier     : 1.0000
Dilution      : 1.0000
Use Multiplier & Dilution Factor with ISTDs
    
```

Signal 1: VMD1 A, Wavelength=254 nm

| Peak # | RetTime [min] | Type | Width [min] | Area mAU   | Height [mAU] | Area %  |
|--------|---------------|------|-------------|------------|--------------|---------|
| 1      | 13.215        | MM   | 0.8607      | 9.14307    | 1.77046e-1   | 0.1675  |
| 2      | 16.871        | MM   | 1.7618      | 5377.70947 | 50.87416     | 98.5143 |
| 3      | 25.761        | MM   | 1.0419      | 5.81636    | 9.30364e-2   | 0.1065  |
| 4      | 30.152        | MM   | 3.5486      | 66.14468   | 3.10659e-1   | 1.2117  |

Totals : 5458.81357 51.45490

Instrument 1 10/25/2011 2:03:40 PM FX

Page 1 of 2



Data File D:\LC\201111\DXQ\DATA\LJ-LK-DXQ\DXQ-13-10A3 2011-11-06 20-08-25\076-0801.D  
 Sample Name: lk-1-7c

```

=====
Acq. Operator   : thl                      Seq. Line :    8
Acq. Instrument : Instrument 1              Location  : Vial 76
Injection Date  : 11/7/2011 12:45:09 AM    Inj       :    1
                                           Inj Volume: 5 µl
Acq. Method     : D:\LC\201111\dxq\data\LJ-LK-DXQ\DXQ-13-10A3 2011-11-06 20-08-25\ADH-10-90-
IML-254MM-30MIN.M
Last changed    : 11/5/2011 7:55:50 PM by TMC
Analysis Method : D:\LC\201111\DXQ\DATA\LJ-LK-DXQ\DXQ-13-10A3 2011-11-06 20-08-25\076-0801.
D\DA.M (ADH-10-90-IML-254MM-30MIN.M)
Last changed    : 11/10/2011 9:04:08 PM by THL
                  (modified after loading)
    
```

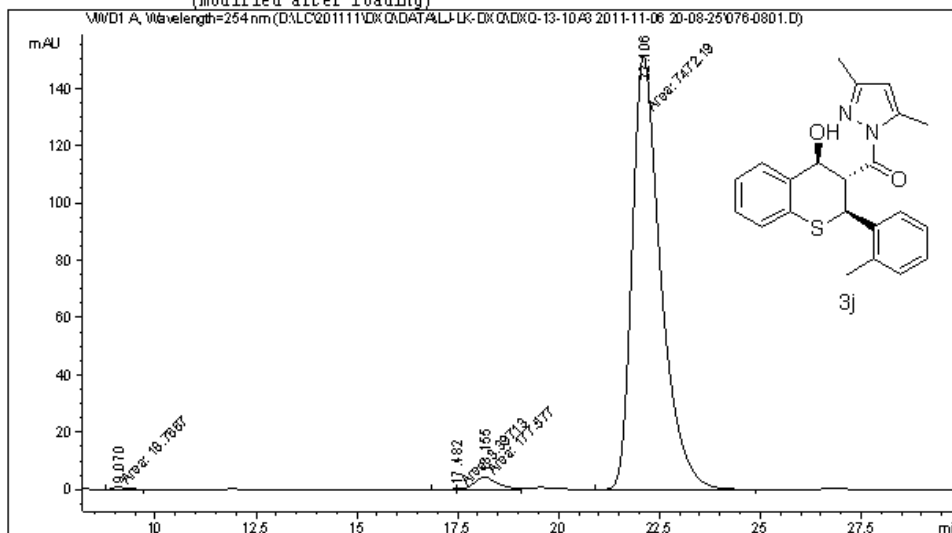

=====  
 Area Percent Report  
 =====

```

Sorted By      :      Signal
Multiplier     :      1.0000
Dilution       :      1.0000
Use Multiplier & Dilution Factor with ISTDs
    
```

Signal 1: WVD1 A, Wavelength=254 nm

| Peak # | RetTime [min] | Type | Width [min] | Area mAU   | Height [mAU] | Area %  |
|--------|---------------|------|-------------|------------|--------------|---------|
| 1      | 9.070         | MM   | 0.3406      | 18.76665   | 9.18196e-1   | 0.2446  |
| 2      | 17.482        | MF   | 0.3135      | 3.39713    | 1.80607e-1   | 0.0443  |
| 3      | 18.155        | FM   | 0.6816      | 177.57684  | 4.34195      | 2.3146  |
| 4      | 22.106        | MM   | 0.8239      | 7472.19238 | 151.15479    | 97.3965 |

Totals :                                    7671.93301  156.59554

Instrument 1 11/10/2011 9:04:22 PM THL

Page 1 of 2



Data File D:\LC\201111\DXQ\DATA\LJ-LK\LJ-1-50-LK-1-7 2011-11-06 14-30-53\075-0301.D  
 Sample Name: lk-1-7b

```

=====
Acq. Operator   : thl                      Seq. Line :    3
Acq. Instrument : Instrument 1              Location  : Vial 75
Injection Date  : 11/6/2011 4:35:24 PM     Inj       :    1
                                           Inj Volume: 5 µl
Acq. Method     : D:\LC\201111\dxq\data\LJ-LK\LJ-1-50-LK-1-7 2011-11-06 14-30-53\ADH-10-90-
MML-254MM-60MIN.M
Last changed    : 11/6/2011 5:11:35 PM by thl
                  (modified after loading)
Analysis Method : D:\LC\201111\DXQ\DATA\LJ-LK\LJ-1-50-LK-1-7 2011-11-06 14-30-53\075-0301.D\
D.A.M (ADH-10-90-1MML-254MM-60MIN.M)
Last changed    : 11/10/2011 8:51:33 PM by THL
                  (modified after loading)
    
```

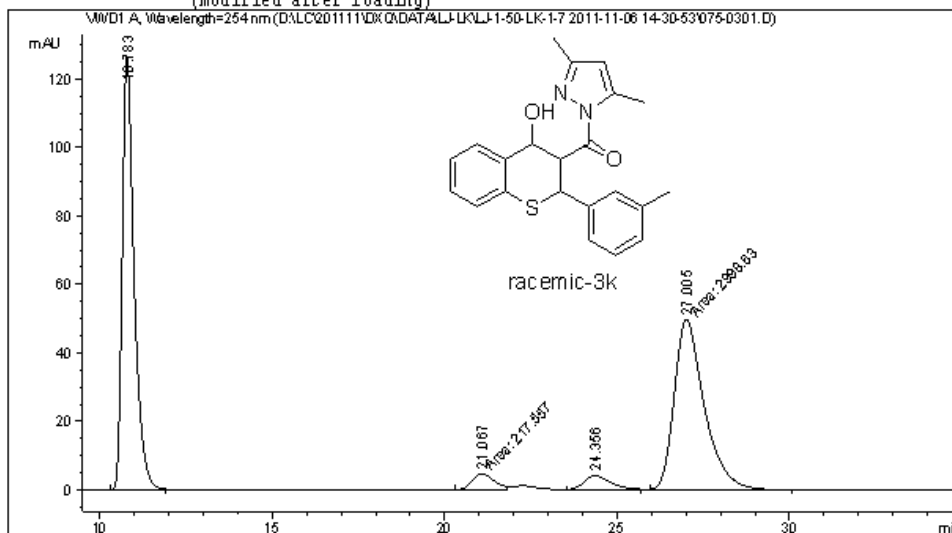

Area Percent Report

```

Sorted By      : Signal
Multiplier     : 1.0000
Dilution       : 1.0000
Use Multiplier & Dilution Factor with ISTDs
    
```

Signal 1: VWD1 A, Wavelength=254 nm

| Peak # | RetTime [min] | Type | Width [min] | Area mAU*s | Height [mAU] | Area %  |
|--------|---------------|------|-------------|------------|--------------|---------|
| 1      | 10.783        | BB   | 0.3547      | 3008.43262 | 126.48126    | 46.7640 |
| 2      | 21.067        | MM   | 0.7546      | 217.55737  | 4.80504      | 3.3818  |
| 3      | 24.356        | BB   | 0.7460      | 208.61406  | 4.03435      | 3.2428  |
| 4      | 27.005        | MM   | 1.0065      | 2998.62500 | 49.65536     | 46.6115 |

Totals : 6433.22905 184.97601

Instrument 1 11/10/2011 8:51:39 PM THL

Page 1 of 2

Data File D:\LC\201111\DXQ\DATA\LJ-LK-DXQ\DXQ-13-10A3 2011-11-06 20-08-25\077-0901.D  
 Sample Name: lk-1-7d

```

=====
Acq. Operator   : thl                      Seq. Line :    9
Acq. Instrument : Instrument 1              Location  : Vial 77
Injection Date  : 11/7/2011 1:16:35 AM     Inj       :    1
                                           Inj Volume: 5 µl
Acq. Method     : D:\LC\201111\dxq\data\LJ-LK-DXQ\DXQ-13-10A3 2011-11-06 20-08-25\ADH-10-90-
IML-254MM-40MIN.M
Last changed    : 11/1/2011 4:42:27 PM by LTL
Analysis Method : D:\LC\201111\DXQ\DATA\LJ-LK-DXQ\DXQ-13-10A3 2011-11-06 20-08-25\077-0901.
D\DA.M (ADH-10-90-IML-254MM-40MIN.M)
Last changed    : 11/10/2011 9:08:21 PM by THL
                  (modified after loading)
    
```

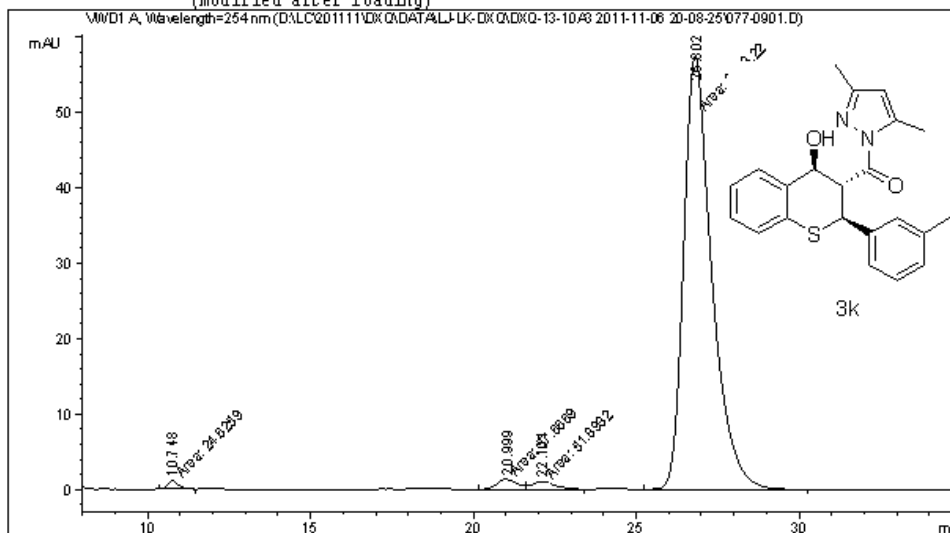

=====  
 Area Percent Report  
 =====

```

Sorted By      : Signal
Multiplier     : 1.0000
Dilution       : 1.0000
Use Multiplier & Dilution Factor with ISTDs
    
```

Signal 1: VMD1 A, Wavelength=254 nm

| Peak # | RetTime [min] | Type | Width [min] | Area mAU *s | Height [mAU] | Area %  |
|--------|---------------|------|-------------|-------------|--------------|---------|
| 1      | 10.748        | MM   | 0.3781      | 24.62591    | 1.08547      | 0.6865  |
| 2      | 20.999        | MF   | 0.7144      | 57.66687    | 1.34530      | 1.6075  |
| 3      | 22.101        | FM   | 0.8278      | 51.89318    | 1.04475      | 1.4465  |
| 4      | 26.802        | MM   | 1.0020      | 3453.22095  | 57.43696     | 96.2595 |

Totals :                                    3587.40691    60.91248

Instrument 1 11/10/2011 9:08:26 PM THL

Page 1 of 2

Data File D:\LC\201111\DXQ\DATA\LJ-1-45\LJ-1-45A 2011-11-01 14-42-45\071-0301.D  
 Sample Name: LJ-1-45A

```

=====
Acq. Operator   : LTL                               Seq. Line :    3
Acq. Instrument : Instrument 1                       Location  : Vial 71
Injection Date  : 11/1/2011 3:57:09 PM              Inj       :    1
                                                    Inj Volume: 5 µl
Acq. Method     : D:\LC\201111\dxq\data\LJ-1-45\LJ-1-45A 2011-11-01 14-42-45\ADH-10-90-1ML-
                220.M
Last changed    : 11/1/2011 4:33:51 PM by LTL
                (modified after loading)
Analysis Method : D:\LC\201111\DXQ\DATA\LJ-1-45\LJ-1-45A 2011-11-01 14-42-45\071-0301.D\DA.M
                (ADH-10-90-1ML-220.M)
Last changed    : 1/1/2012 5:59:29 PM by thl
                (modified after loading)
    
```

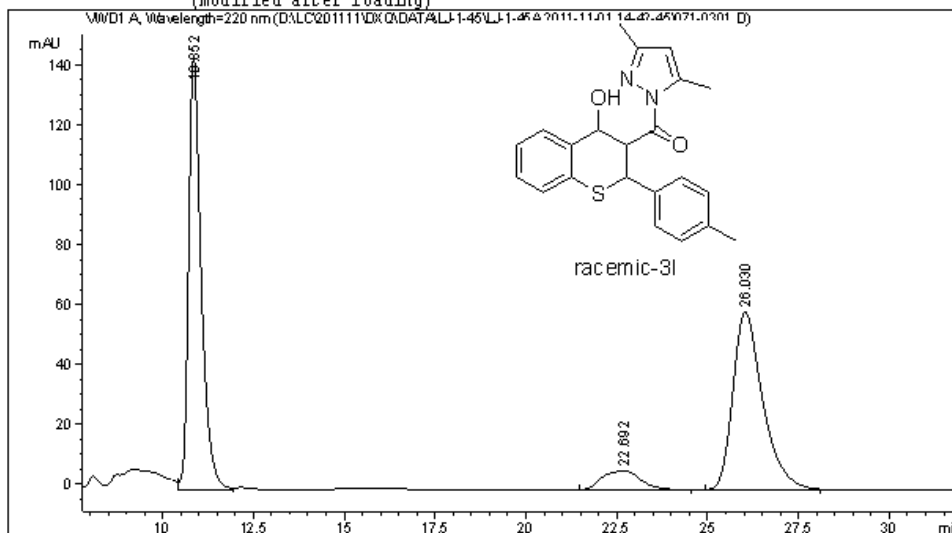

Area Percent Report

```

Sorted By      : Signal
Multiplier     : 1.0000
Dilution       : 1.0000
Use Multiplier & Dilution Factor with ISTDs
    
```

Signal 1: VWD1 A, Wavelength=220 nm

| Peak # | RetTime [min] | Type | Width [min] | Area mAU*s | Height [mAU] | Area %  |
|--------|---------------|------|-------------|------------|--------------|---------|
| 1      | 10.852        | VB   | 0.3596      | 3478.65356 | 144.45667    | 47.4977 |
| 2      | 22.692        | BB   | 0.9464      | 460.54907  | 6.44053      | 6.2884  |
| 3      | 26.030        | BB   | 0.8566      | 3384.63452 | 59.29886     | 46.2140 |

Totals : 7323.83716 210.19606

Instrument 1 1/1/2012 5:59:38 PM thl

Page 1 of 2



Data File D:\LC\201111\DXQ\DATA\LJ-1-45\LJ-1-45A 2011-11-01 14-42-45\072-0401.D  
 Sample Name: LJ-1-45B

```

=====
Acq. Operator   : LTL                               Seq. Line :    4
Acq. Instrument : Instrument 1                       Location  : Vial 72
Injection Date  : 11/1/2011 4:38:45 PM              Inj       :    1
                                                    Inj Volume: 5 µl
Acq. Method     : D:\LC\201111\dxq\data\LJ-1-45\LJ-1-45A 2011-11-01 14-42-45\ADH-10-90-1ML-
                220.M
Last changed    : 11/1/2011 5:27:25 PM by LTL
                (modified after loading)
Analysis Method : D:\LC\201111\DXQ\DATA\LJ-1-45\LJ-1-45A 2011-11-01 14-42-45\072-0401.D\DA.M
                (ADH-10-90-1ML-220.M)
Last changed    : 11/10/2011 7:20:24 PM by THL
                (modified after loading)
    
```

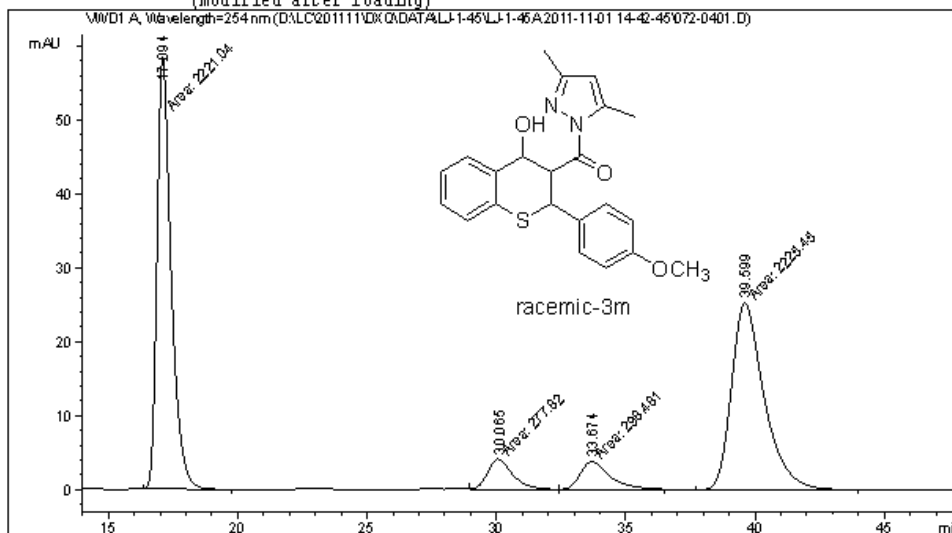

Area Percent Report

```

Sorted By      : Signal
Multiplier     : 1.0000
Dilution       : 1.0000
Use Multiplier & Dilution Factor with ISTDs
    
```

Signal 1: VWD1 A, Wavelength=254 nm

| Peak # | RetTime [min] | Type | Width [min] | Area mAU*s | Height [mAU] | Area %  |
|--------|---------------|------|-------------|------------|--------------|---------|
| 1      | 17.094        | MM   | 0.6327      | 2221.04443 | 58.51120     | 44.2193 |
| 2      | 30.065        | MM   | 1.1256      | 277.81979  | 4.11376      | 5.5312  |
| 3      | 33.674        | MM   | 1.3181      | 298.48105  | 3.77402      | 5.9425  |
| 4      | 39.599        | MM   | 1.4658      | 2225.44946 | 25.30422     | 44.3070 |

Totals : 5022.79474 91.70320

Instrument 1 11/10/2011 7:20:28 PM THL

Page 1 of 2

Data File D:\LC\201111\DXQ\DATA\LJ-1-45\LJ-1-45A 2011-11-01 14-42-45\074-0601.D  
 Sample Name: LJ-1-45D

```

=====
Acq. Operator   : LTL                               Seq. Line :    6
Acq. Instrument : Instrument 1                       Location  : Vial 74
Injection Date  : 11/1/2011 6:10:57 PM              Inj       :    1
                                                    Inj Volume: 5 µl
Acq. Method     : D:\LC\201111\dxq\data\LJ-1-45\LJ-1-45A 2011-11-01 14-42-45\ADH-10-90-1ML-
254MM-60MIN.M
Last changed    : 11/1/2011 5:36:20 PM by LTL
Analysis Method : D:\LC\201111\DXQ\DATA\LJ-1-45\LJ-1-45A 2011-11-01 14-42-45\074-0601.D\DA.M
(ADH-10-90-1ML-254MM-60MIN.M)
Last changed    : 11/10/2011 7:36:15 PM by THL
(modified after loading)
    
```

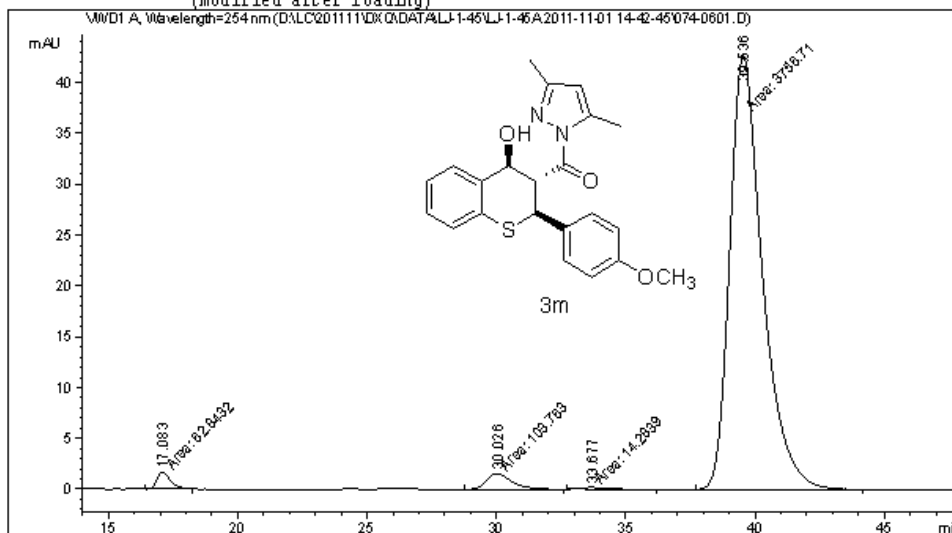

Area Percent Report

```

Sorted By      : Signal
Multiplier     : 1.0000
Dilution       : 1.0000
Use Multiplier & Dilution Factor with ISTDs
    
```

Signal 1: WVD1 A, Wavelength=254 nm

| Peak # | RetTime [min] | Type | Width [min] | Area mAU   | Area %  | Height [mAU] |
|--------|---------------|------|-------------|------------|---------|--------------|
| 1      | 17.083        | MM   | 0.6247      | 62.84315   | 1.5960  | 1.67652      |
| 2      | 30.026        | MM   | 1.1155      | 103.76342  | 2.6352  | 1.55036      |
| 3      | 33.677        | MM   | 1.2817      | 14.28390   | 0.3628  | 1.85747e-1   |
| 4      | 39.536        | MM   | 1.4687      | 3756.70654 | 95.4061 | 42.63120     |

Totals : 3937.59702 46.04383

Instrument 1 11/10/2011 7:36:20 PM THL

Page 1 of 2

Data File D:\LC\201111\DXQ\DATA\DXQ-13-10\DXQ-13-10A1 2011-11-05 17-48-44\072-0801.D  
Sample Name: 1j-1-50a

=====  
Acq. Operator : TMC Seq. Line : 8  
Acq. Instrument : Instrument 1 Location : Vial 72  
Injection Date : 11/5/2011 9:32:55 PM Inj : 1  
Inj Volume : 5 µl  
Acq. Method : D:\LC\201111\dxq\data\DXQ-13-10\DXQ-13-10A1 2011-11-05 17-48-44\ADH-10-90-  
1ML-254NM-30MIN.M  
Last changed : 11/5/2011 10:15:53 PM by TMC  
(modified after loading)  
Analysis Method : D:\LC\201111\DXQ\DATA\DXQ-13-10\DXQ-13-10A1 2011-11-05 17-48-44\072-0801.  
D\DA.M (ADH-10-90-1ML-254NM-30MIN.M)  
Last changed : 11/10/2011 8:19:34 PM by THL  
(modified after loading)  
=====

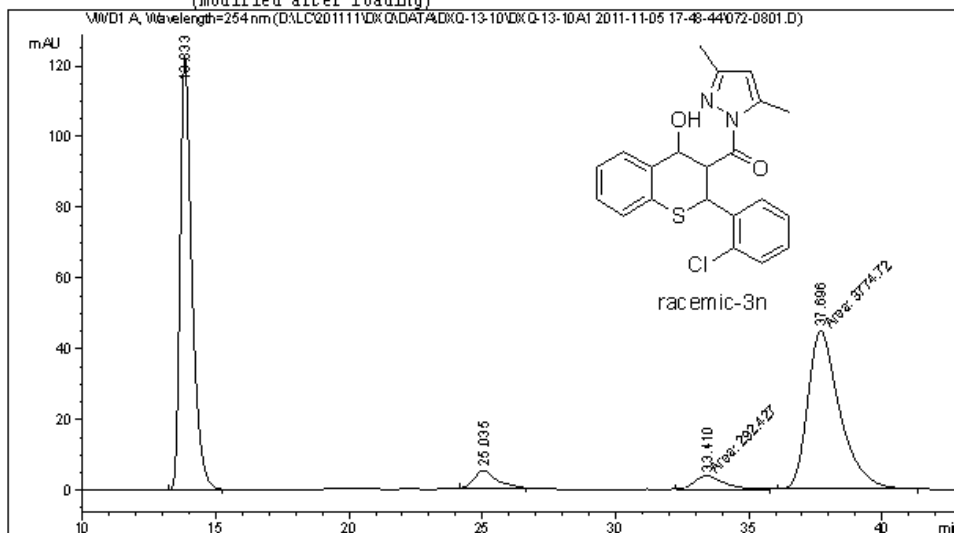

=====  
Area Percent Report  
=====

Sorted By : Signal  
Multiplier : 1.0000  
Dilution : 1.0000  
Use Multiplier & Dilution Factor with ISTDs

Signal 1: VWD1 A, Wavelength=254 nm

| Peak # | RetTime [min] | Type | Width [min] | Area mAU*s | Height [mAU] | Area %  |
|--------|---------------|------|-------------|------------|--------------|---------|
| 1      | 13.833        | BB   | 0.4564      | 3754.91797 | 122.55990    | 46.2695 |
| 2      | 25.035        | BB   | 0.8282      | 293.25409  | 4.96974      | 3.6136  |
| 3      | 33.410        | MM   | 1.2733      | 292.42661  | 3.82775      | 3.6034  |
| 4      | 37.696        | MM   | 1.4035      | 3774.72168 | 44.82587     | 46.5135 |

Totals : 8115.32034 176.18326

Instrument 1 11/10/2011 8:19:39 PM THL

Page 1 of 2

Data File D:\LC\201111\DXQ\DATA\LJ-1-51B\LJ-1-51B 2011-11-08 13-19-23\075-0101.D  
 Sample Name: lj-1-51b

```

=====
Acq. Operator   : THL                               Seq. Line :    1
Acq. Instrument : Instrument 1                       Location  : Vial 75
Injection Date  : 11/8/2011 1:20:46 PM              Inj       :    1
                                                    Inj Volume: 5 µl
Acq. Method     : D:\LC\201111\dxq\data\LJ-1-51B\LJ-1-51B 2011-11-08 13-19-23\ADH-10-90-1ML-
254NM-45MIN.M
Last changed    : 11/6/2011 7:43:25 PM by thl
Analysis Method : D:\LC\201111\DXQ\DATA\LJ-1-51B\LJ-1-51B 2011-11-08 13-19-23\075-0101.D\DA.
M (ADH-10-90-1ML-254NM-45MIN.M)
Last changed    : 11/10/2011 8:27:28 PM by THL
                  (modified after loading)
    
```

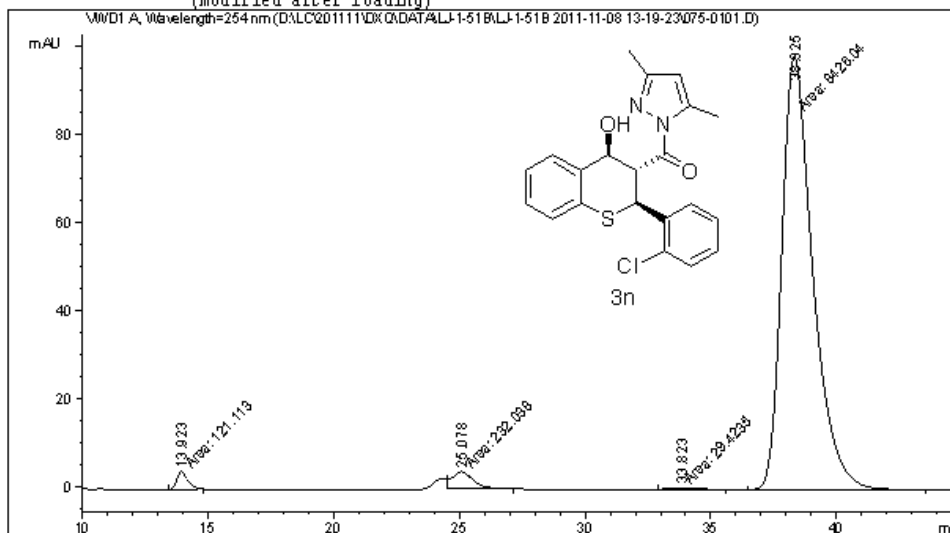

=====  
 Area Percent Report  
 =====

```

Sorted By      :      Signal
Multiplier     :      1.0000
Dilution       :      1.0000
Use Multiplier & Dilution Factor with ISTDs
    
```

Signal 1: WVD1 A, Wavelength=254 nm

| Peak # | RetTime [min] | Type | Width [min] | Area mAU   | Area *s    | Height [mAU] | Area % |
|--------|---------------|------|-------------|------------|------------|--------------|--------|
| 1      | 13.923        | MM   | 0.4983      | 121.11275  | 4.05103    | 1.3749       |        |
| 2      | 25.078        | MM   | 0.9827      | 232.03789  | 3.93548    | 2.6342       |        |
| 3      | 33.823        | MM   | 1.1720      | 29.42353   | 4.18433e-1 | 0.3340       |        |
| 4      | 38.325        | MM   | 1.4250      | 8426.04004 | 98.55006   | 95.6568      |        |

Totals :                                    8808.61421   106.95501

Instrument 1 11/10/2011 8:27:35 PM THL

Page 1 of 2



Data File D:\LC\201111\TA\LJ-1-55-LK-1-10\LJ-1-55A-LK-1-10A 2011-11-09 14-38-50\063-0101.D  
 Sample Name: LJ-1-55A

```

=====
Acq. Operator   : THL                      Seq. Line :    1
Acq. Instrument : Instrument 1              Location  : Vial 63
Injection Date  : 11/9/2011 2:40:52 PM     Inj       :    1
                                           Inj Volume: 5 µl
Acq. Method    : D:\LC\201111\dxq\data\LJ-1-55-LK-1-10\LJ-1-55A-LK-1-10A 2011-11-09 14-38-
50\ADH-10-90-1ML-254MM-40MIN.M
Last changed   : 11/9/2011 3:34:56 PM by THL
                (modified after loading)
Analysis Method: D:\LC\201111\DXQ\DATA\LJ-1-55-LK-1-10\LJ-1-55A-LK-1-10A 2011-11-09 14-38-
50\063-0101.D\DA.M (ADH-10-90-1ML-254MM-40MIN.M)
Last changed   : 11/10/2011 8:34:43 PM by THL
                (modified after loading)
    
```

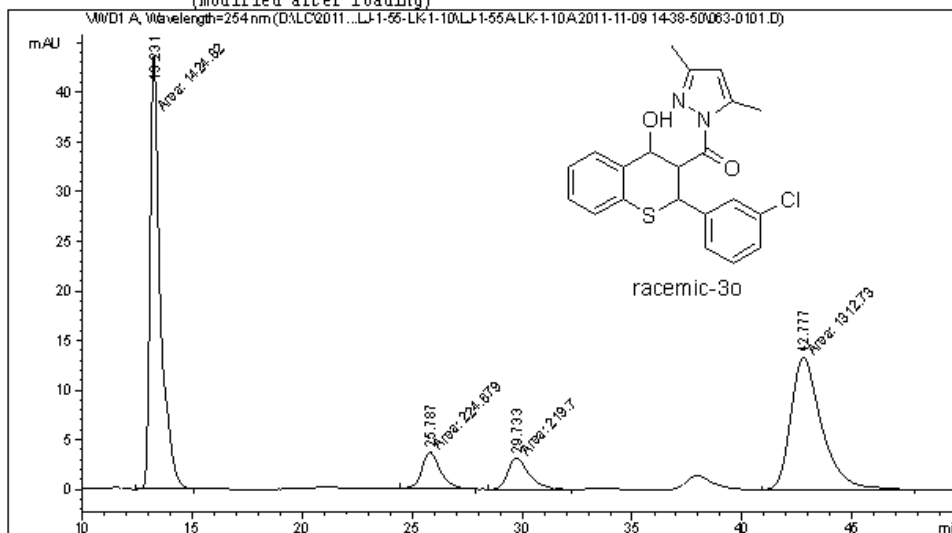

=====  
 Area Percent Report  
 =====

```

Sorted By      :      Signal
Multiplier     :      1.0000
Dilution       :      1.0000
Use Multiplier & Dilution Factor with ISTDs
    
```

Signal 1: VWD1 A, Wavelength=254 nm

| Peak # | RetTime [min] | Type | Width [min] | Area mAU *s | Height [mAU] | Area %  |
|--------|---------------|------|-------------|-------------|--------------|---------|
| 1      | 13.231        | MM   | 0.5447      | 1424.82349  | 43.59535     | 44.7786 |
| 2      | 25.787        | MM   | 1.0076      | 224.67863   | 3.71627      | 7.0611  |
| 3      | 29.733        | MM   | 1.1467      | 219.69971   | 3.19326      | 6.9046  |
| 4      | 42.777        | MM   | 1.6416      | 1312.72913  | 13.32735     | 41.2557 |

Totals :                      3181.93095    63.83223

Instrument 1 11/10/2011 8:34:48 PM THL

Page 1 of 2

Data File D:\LC\201111\DXQ\DATA\LJ-1-55\LJ-1-55B 2011-11-09 17-48-37\071-0101.D  
 Sample Name: LJ-1-55B

```

=====
Acq. Operator   : THL                      Seq. Line :    1
Acq. Instrument : Instrument 1              Location  : Vial 71
Injection Date  : 11/9/2011 5:49:59 PM    Inj       :    1
                                           Inj Volume: 5 µl
Acq. Method     : D:\LC\201111\dxq\data\LJ-1-55\LJ-1-55B 2011-11-09 17-48-37\ADH-10-90-1ML-
254MM-60MIN.M
Last changed    : 11/9/2011 6:42:24 PM by THL
                  (modified after loading)
Analysis Method : D:\LC\201111\DXQ\DATA\LJ-1-55\LJ-1-55B 2011-11-09 17-48-37\071-0101.D\DA.M
                  (ADH-10-90-1ML-254MM-60MIN.M)
Last changed    : 11/10/2011 8:37:43 PM by THL
                  (modified after loading)
    
```

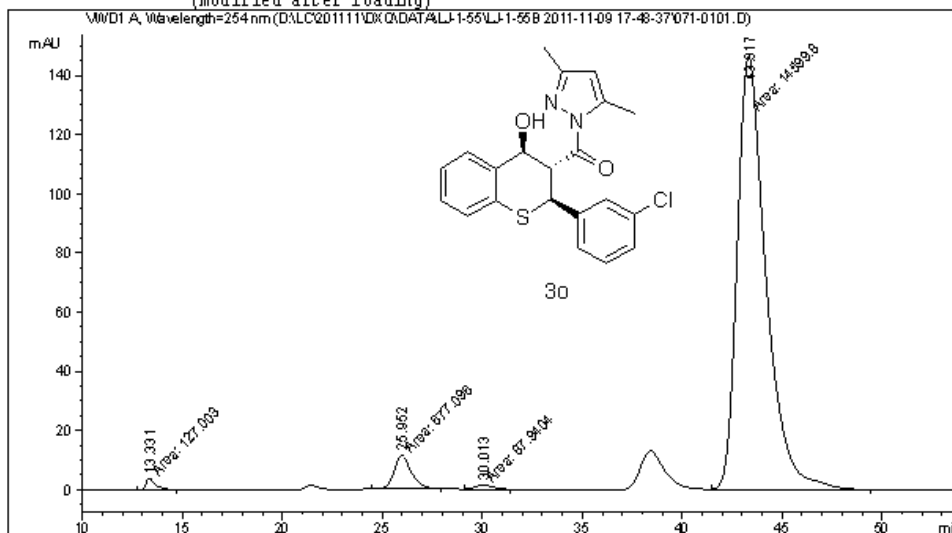

Area Percent Report

```

Sorted By      : Signal
Multiplier     : 1.0000
Dilution       : 1.0000
Use Multiplier & Dilution Factor with ISTDs
    
```

Signal 1: VWD1 A, Wavelength=254 nm

| Peak # | RetTime [min] | Type | Width [min] | Area mAU*s | Height [mAU] | Area %  |
|--------|---------------|------|-------------|------------|--------------|---------|
| 1      | 13.331        | MM   | 0.5474      | 127.00271  | 3.86668      | 0.8198  |
| 2      | 25.952        | MM   | 0.9905      | 677.09619  | 11.39303     | 4.3707  |
| 3      | 30.013        | MM   | 1.0066      | 87.94037   | 1.45608      | 0.5677  |
| 4      | 43.317        | MM   | 1.6637      | 1.45998e4  | 146.25407    | 94.2419 |

Totals : 1.54918e4 162.96986

Instrument 1 11/10/2011 8:37:49 PM THL

Page 1 of 2



Data File D:\LC\201111\DXQ\DATA\LJ-1-47\LJ-1-47A 2011-11-03 19-09-06\073-0101.D  
 Sample Name: LJ-1-47C

```

=====
Acq. Operator   : LTL                               Seq. Line :    1
Acq. Instrument : Instrument 1                       Location  : Vial 73
Injection Date  : 11/3/2011 7:10:21 PM              Inj       :    1
                                                    Inj Volume: 5 µl

Acq. Method     : D:\LC\201111\dxq\data\LJ-1-47\LJ-1-47A 2011-11-03 19-09-06\ADH-10-90-1ML-
254MM.M
Last changed    : 11/3/2011 7:10:58 PM by LTL
                  (modified after loading)
Analysis Method : D:\LC\201111\DXQ\DATA\LJ-1-47\LJ-1-47A 2011-11-03 19-09-06\073-0101.D\DA.M
                  (ADH-10-90-1ML-254MM.M)
Last changed    : 11/10/2011 7:57:07 PM by THL
                  (modified after loading)
    
```

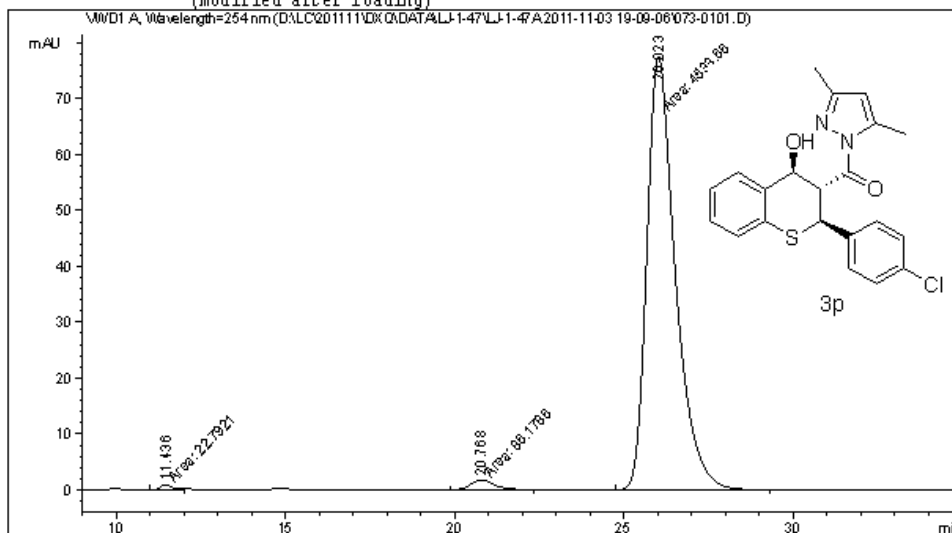

Area Percent Report

```

Sorted By      : Signal
Multiplier     : 1.0000
Dilution      : 1.0000
Use Multiplier & Dilution Factor with ISTDs
    
```

Signal 1: VWD1 A, Wavelength=254 nm

| Peak #   | RetTime [min] | Type | Width [min] | Area mAU *s | Height [mAU] | Area %  |
|----------|---------------|------|-------------|-------------|--------------|---------|
| 1        | 11.436        | MM   | 0.4284      | 22.79212    | 8.86666e-1   | 0.4909  |
| 2        | 20.768        | MM   | 0.8196      | 86.17857    | 1.75242      | 1.8562  |
| 3        | 26.023        | MM   | 0.9745      | 4533.66162  | 77.54041     | 97.6528 |
| Totals : |               |      |             | 4642.63231  | 80.17950     |         |

Instrument 1 11/10/2011 7:57:11 PM THL

Page 1 of 2

Data File D:\LC\201111\DXQ\DATA\LJ-1-47\LJ-1-47A 2011-11-03 17-20-46\072-0201.D  
 Sample Name: LJ-1-47B

```

=====
Acq. Operator   : LTL                               Seq. Line :    2
Acq. Instrument : Instrument 1                       Location  : Vial 72
Injection Date  : 11/3/2011 6:15:09 PM              Inj       :    1
                                                    Inj Volume: 5 µl
Acq. Method     : D:\LC\201111\dxq\data\LJ-1-47\LJ-1-47A 2011-11-03 17-20-46\ADH-10-90-1ML-
254MM.M
Last changed    : 11/3/2011 6:13:46 PM by LTL
                  (modified after loading)
Analysis Method : D:\LC\201111\DXQ\DATA\LJ-1-47\LJ-1-47A 2011-11-03 17-20-46\072-0201.D\DA.M
                  (ADH-10-90-1ML-254MM.M)
Last changed    : 11/10/2011 7:43:54 PM by THL
                  (modified after loading)
    
```

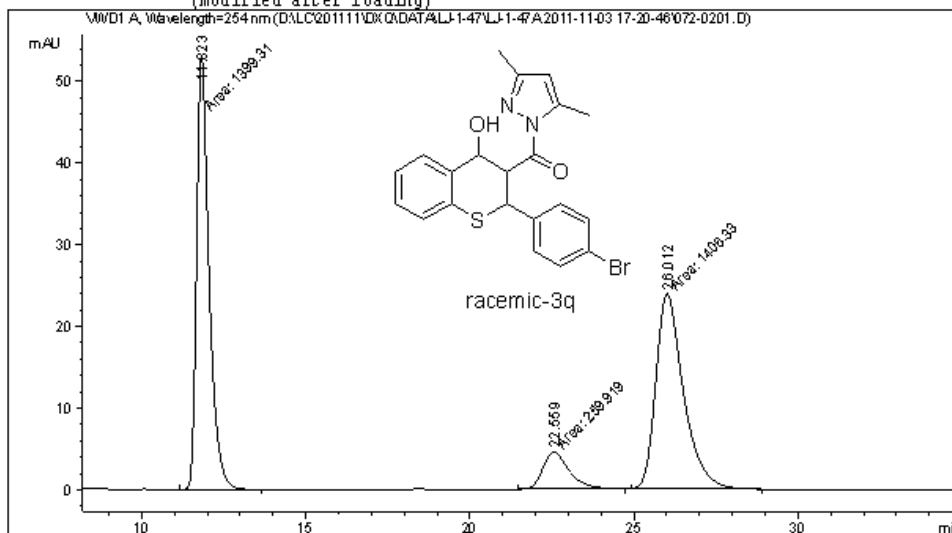

Area Percent Report

```

Sorted By      : Signal
Multiplier     : 1.0000
Dilution      : 1.0000
Use Multiplier & Dilution Factor with ISTDs
    
```

Signal 1: VWD1 A, Wavelength=254 nm

| Peak #   | RetTime [min] | Type | Width [min] | Area mAU*s | Height [mAU] | Area %  |
|----------|---------------|------|-------------|------------|--------------|---------|
| 1        | 11.823        | MM   | 0.4400      | 1399.31262 | 53.00880     | 45.6463 |
| 2        | 22.559        | MM   | 0.9469      | 259.91943  | 4.57490      | 8.4787  |
| 3        | 26.012        | MM   | 0.9800      | 1406.32507 | 23.91792     | 45.8750 |
| Totals : |               |      |             | 3065.55713 | 81.50162     |         |

Instrument 1 11/10/2011 7:43:59 PM THL

Page 1 of 2

Data File D:\LC\201111\DXQ\DATA\LJ-1-47\LJ-1-47A 2011-11-03 19-09-06\074-0201.D  
 Sample Name: LJ-1-47D

```

=====
Acq. Operator   : LTL                      Seq. Line :    2
Acq. Instrument : Instrument 1              Location  : Vial 74
Injection Date  : 11/3/2011 7:46:57 PM     Inj       :    1
                                           Inj Volume: 5 µl
Acq. Method     : D:\LC\201111\dxq\data\LJ-1-47\LJ-1-47A 2011-11-03 19-09-06\ADH-10-90-1ML-
254MM.M
Last changed    : 11/3/2011 8:21:37 PM by LTL
                  (modified after loading)
Analysis Method : D:\LC\201111\DXQ\DATA\LJ-1-47\LJ-1-47A 2011-11-03 19-09-06\074-0201.D\DA.M
                  (ADH-10-90-1ML-254MM.M)
Last changed    : 11/10/2011 8:01:00 PM by THL
                  (modified after loading)
    
```

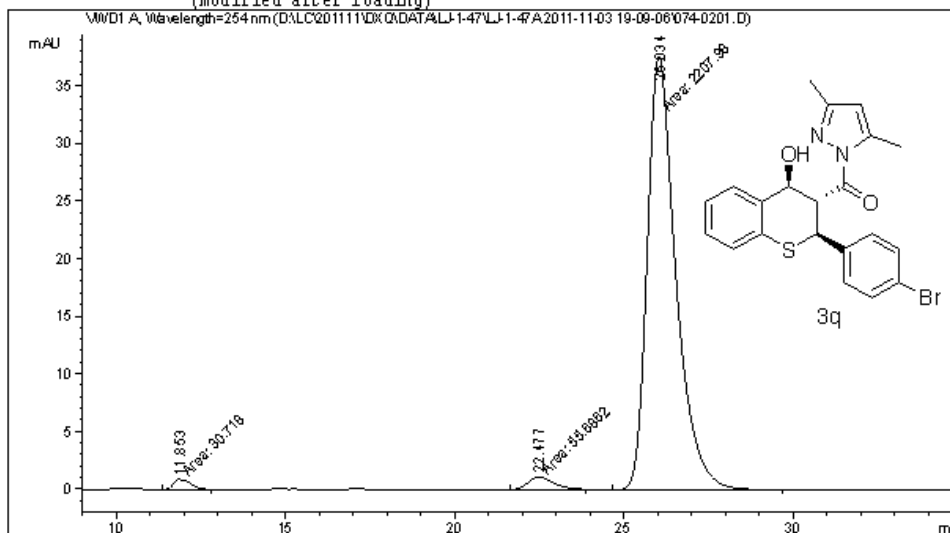

Area Percent Report

```

Sorted By      : Signal
Multiplier     : 1.0000
Dilution       : 1.0000
Use Multiplier & Dilution Factor with ISTDs
    
```

Signal 1: VWD1 A, Wavelength=254 nm

| Peak #   | RetTime [min] | Type | Width [min] | Area mAU   | Height [mAU] | Area %  |
|----------|---------------|------|-------------|------------|--------------|---------|
| 1        | 11.853        | MM   | 0.5825      | 30.71800   | 8.78972e-1   | 1.3388  |
| 2        | 22.477        | MM   | 0.8501      | 55.68617   | 1.09181      | 2.4271  |
| 3        | 26.034        | MM   | 0.9788      | 2207.97803 | 37.59824     | 96.2341 |
| Totals : |               |      |             | 2294.38220 | 39.56902     |         |

Instrument 1 11/10/2011 8:01:05 PM THL

Page 1 of 2

Data File D:\LC\201111\DXQ\DATA\LJ-1-57\LJ-1-57A1 2011-11-10 15-02-42\071-0101.D  
Sample Name: LJ-1-57A

```
=====
Acq. Operator   : THL                               Seq. Line :    1
Acq. Instrument : Instrument 1                       Location  : Vial 71
Injection Date  : 11/10/2011 3:03:56 PM             Inj       :    1
                                                    Inj Volume: 5 µl
Acq. Method     : D:\LC\201111\dxq\data\LJ-1-57\LJ-1-57A1 2011-11-10 15-02-42\ADH-10-90-1ML-
254MM.M
Last changed    : 11/10/2011 3:58:02 PM by THL
(modified after loading)
Analysis Method : D:\LC\201111\DXQ\DATA\LJ-1-57\LJ-1-57A1 2011-11-10 15-02-42\071-0101.D\DA.
M (ADH-10-90-1ML-254MM.M)
Last changed    : 11/10/2011 8:40:44 PM by THL
(modified after loading)
=====
```

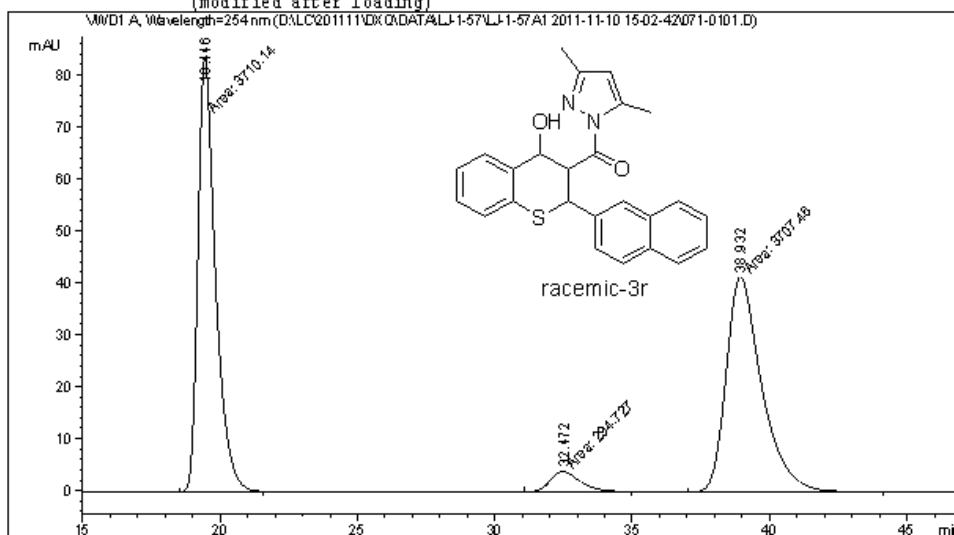

=====  
Area Percent Report  
=====

Sorted By : Signal  
Multiplier : 1.0000  
Dilution : 1.0000  
Use Multiplier & Dilution Factor with ISTDs

Signal 1: VWD1 A, Wavelength=254 nm

| Peak # | RetTime [min] | Type | Width [min] | Area mAU*s | Height [mAU] | Area %  |
|--------|---------------|------|-------------|------------|--------------|---------|
| 1      | 19.446        | MM   | 0.7419      | 3710.13672 | 83.34570     | 48.1066 |
| 2      | 32.472        | MM   | 1.2569      | 294.72723  | 3.90820      | 3.8215  |
| 3      | 38.932        | MM   | 1.4940      | 3707.45801 | 41.36030     | 48.0719 |

Totals : 7712.32196 128.61420

Instrument 1 11/10/2011 8:40:49 PM THL

Page 1 of 2

Data File D:\LC\201111\DXQ\DATA\LK-LJ\LK-LJ 2011-11-10 16-41-03\072-0201.D  
Sample Name: LJ-1-57B

```
=====
Acq. Operator   : THL                               Seq. Line :    2
Acq. Instrument : Instrument 1                       Location  : Vial 72
Injection Date  : 11/10/2011 5:18:54 PM             Inj       :    1
                                                    Inj Volume:    5 µl
Acq. Method     : D:\LC\201111\dxq\data\LK-LJ\LK-LJ 2011-11-10 16-41-03\ADH-10-90-1ML-254MM-45MIN.M
Last changed    : 11/6/2011 7:43:25 PM by thl
Analysis Method : D:\LC\201111\DXQ\DATA\LK-LJ\LK-LJ 2011-11-10 16-41-03\072-0201.D\A.D.A.M (ADH-10-90-1ML-254MM-45MIN.M)
Last changed    : 11/10/2011 8:42:42 PM by THL
                (modified after loading)
```

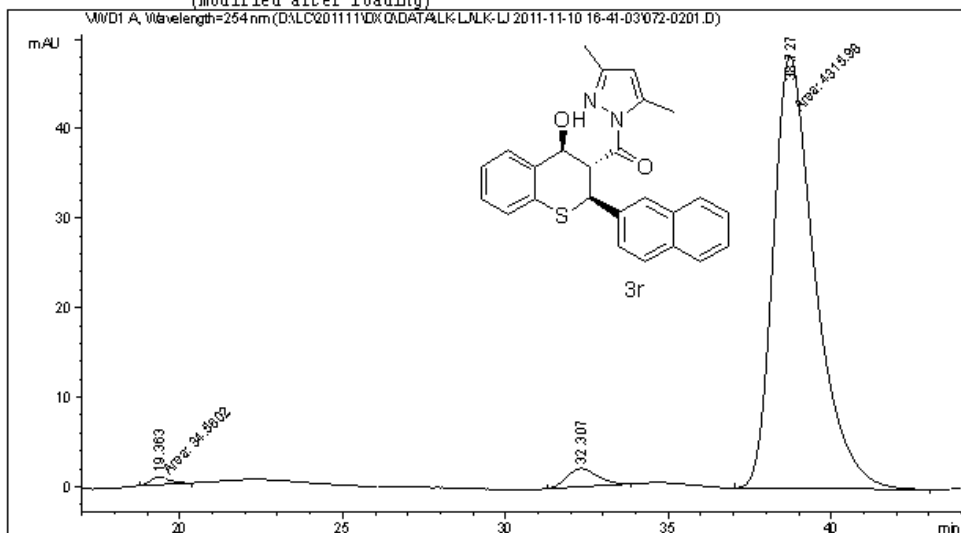

=====  
Area Percent Report  
=====

Sorted By : Signal  
Multiplier : 1.0000  
Dilution : 1.0000  
Use Multiplier & Dilution Factor with ISTDs

Signal 1: VMD1 A, Wavelength=254 nm

| Peak # | RetTime [min] | Type | Width [min] | Area mAU   | Height [mAU] | Area %  |
|--------|---------------|------|-------------|------------|--------------|---------|
| 1      | 19.363        | MM   | 0.6892      | 34.56019   | 8.35790e-1   | 0.7709  |
| 2      | 32.307        | BB   | 0.8108      | 132.27974  | 2.03499      | 2.9508  |
| 3      | 38.727        | MM   | 1.4880      | 4315.98340 | 48.34136     | 96.2782 |

Totals : 4482.82333 51.21214

Instrument 1 11/10/2011 8:42:48 PM THL

Page 1 of 2



Data File D:\LC\201111\TA\LJ-1-55-LK-1-10\LJ-1-55A-LK-1-10A 2011-11-09 14-38-50\064-0201.D  
 Sample Name: LK-1-10A

```

=====
Acq. Operator   : THL                               Seq. Line :    2
Acq. Instrument : Instrument 1                       Location  : Vial 64
Injection Date  : 11/9/2011 3:37:05 PM              Inj       :    1
                                                    Inj Volume: 5 µl
Acq. Method     : D:\LC\201111\dxq\data\LJ-1-55-LK-1-10\LJ-1-55A-LK-1-10A 2011-11-09 14-38-
50\ADH-10-90-1ML-254NM-40MIN.M
Last changed    : 11/9/2011 3:37:28 PM by THL
                  (modified after loading)
Analysis Method : D:\LC\201111\DXQ\DATA\LJ-1-55-LK-1-10\LJ-1-55A-LK-1-10A 2011-11-09 14-38-
50\064-0201.D\DA.M (ADH-10-90-1ML-254NM-40MIN.M)
Last changed    : 11/10/2011 9:13:30 PM by THL
                  (modified after loading)
    
```

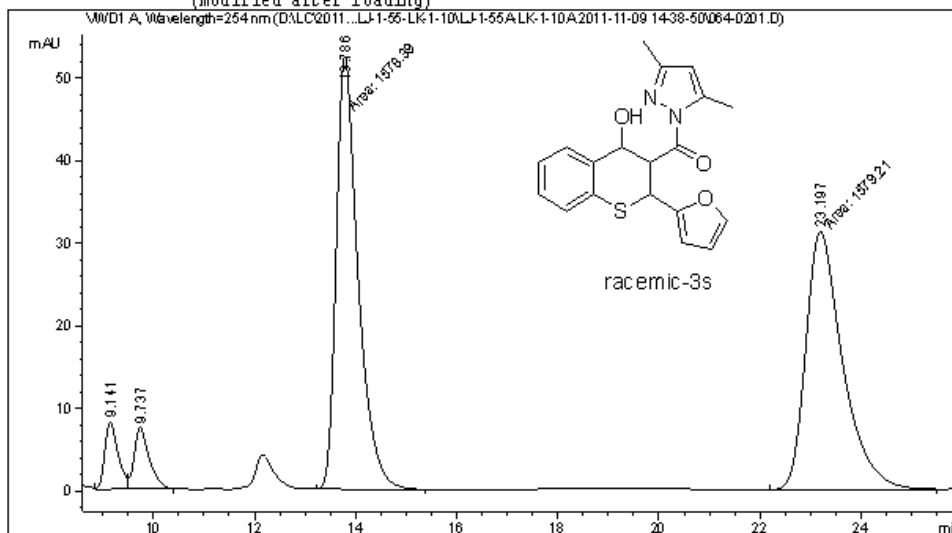

=====  
 Area Percent Report  
 =====

```

Sorted By      : Signal
Multiplier     : 1.0000
Dilution       : 1.0000
Use Multiplier & Dilution Factor with ISTDs
    
```

Signal 1: VWD1 A, Wavelength=254 nm

| Peak # | RetTime [min] | Type | Width [min] | Area mAU *s | Height [mAU] | Area %  |
|--------|---------------|------|-------------|-------------|--------------|---------|
| 1      | 9.141         | BV   | 0.2755      | 148.98314   | 8.10752      | 4.3061  |
| 2      | 9.737         | VB   | 0.3038      | 153.23900   | 7.41240      | 4.4291  |
| 3      | 13.786        | MM   | 0.5023      | 1578.39233  | 52.37198     | 45.6206 |
| 4      | 23.197        | MM   | 0.8416      | 1579.21045  | 31.27554     | 45.6442 |

Totals : 3459.82492 99.16745

Instrument 1 11/10/2011 9:13:34 PM THL

Page 1 of 2



Data File D:\LC\201112\DXQ\DXQ-13-92\DXQ-13-92 2012-01-05 11-21-28\071-0101.D  
Sample Name: DXQ-13-92A

```
=====
Acq. Operator   : LQH                               Seq. Line :    1
Acq. Instrument : Instrument 1                       Location  : Vial 71
Injection Date  : 1/5/2012 11:22:49 AM              Inj       :    1
                                                    Inj Volume: 5 µl
Acq. Method     : D:\LC\201112\dxq\DXQ-13-92\DXQ-13-92 2012-01-05 11-21-28\0DH-30-70-1ML-
                220NM-60MIN.M
Last changed    : 1/5/2012 12:09:42 PM by LQH
                (modified after loading)
Analysis Method : D:\LC\201112\DXQ\DXQ-13-92\DXQ-13-92 2012-01-05 11-21-28\071-0101.D\DA.M (
                ASH-30-70-1ML-220NM-60MIN.M)
Last changed    : 1/6/2012 8:54:06 AM by THL
                (modified after loading)
=====
```

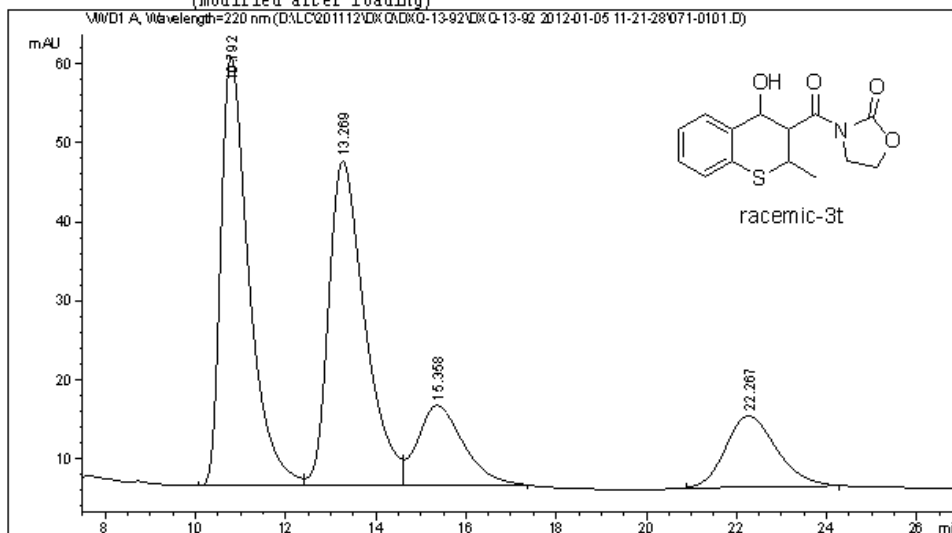

=====  
Area Percent Report  
=====

Sorted By : Signal  
Multiplier : 1.0000  
Dilution : 1.0000  
Use Multiplier & Dilution Factor with ISTDs

Signal 1: VWD1 A, Wavelength=220 nm

| Peak # | RetTime [min] | Type | Width [min] | Area mAU*s | Height [mAU] | Area %  |
|--------|---------------|------|-------------|------------|--------------|---------|
| 1      | 10.792        | BB   | 0.6473      | 2351.31104 | 54.36254     | 38.6813 |
| 2      | 13.269        | BV   | 0.8331      | 2294.43872 | 41.11519     | 37.7457 |
| 3      | 15.358        | VB   | 1.0275      | 722.47992  | 10.17967     | 11.8855 |
| 4      | 22.267        | BB   | 1.1195      | 710.44257  | 9.02372      | 11.6875 |

Totals : 6078.67224 114.68112

Instrument 1 1/6/2012 8:54:11 AM THL

Page 1 of 2



Data File D:\LC\201201\DXQ\DXQ-13-120\DXQ-13-120 2012-02-14 16-54-20\071-0101.D  
 Sample Name: dxq-13-120

```

=====
Acq. Operator   : thl                               Seq. Line :    1
Acq. Instrument : Instrument 1                       Location  : Vial 71
Injection Date  : 2/14/2012 4:55:31 PM             Inj       :    1
                                                    Inj Volume: 5 µl
Acq. Method     : D:\LC\201201\DXQ\DXQ-13-120\DXQ-13-120 2012-02-14 16-54-20\ASH-10-90-1ML-
254MM.M
Last changed    : 11/3/2011 11:58:38 AM by THL
Analysis Method : D:\LC\201201\DXQ\DXQ-13-120\DXQ-13-120 2012-02-14 16-54-20\071-0101.D\DA.M
(ASH-10-90-1ML-254MM.M)
Last changed    : 3/6/2012 8:09:48 PM by thl
(modified after loading)
    
```

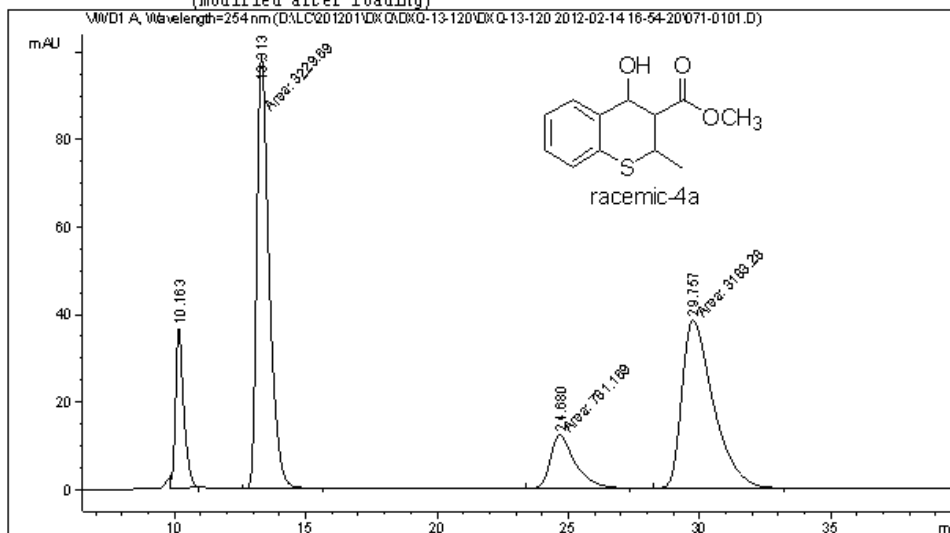

Area Percent Report

```

Sorted By      : Signal
Multiplier     : 1.0000
Dilution       : 1.0000
Use Multiplier & Dilution Factor with ISTDs
    
```

Signal 1: VMD1 A, Wavelength=254 nm

| Peak # | RetTime [min] | Type | Width [min] | Area mAU   | Area %   | Height [mAU] | Area %  |
|--------|---------------|------|-------------|------------|----------|--------------|---------|
| 1      | 10.163        | VB   | 0.3223      | 790.82233  | 36.34251 | 36.34251     | 9.9039  |
| 2      | 13.313        | MM   | 0.5457      | 3229.68579 | 98.63870 | 98.63870     | 40.4472 |
| 3      | 24.680        | MM   | 1.0763      | 781.16901  | 12.09610 | 12.09610     | 9.7830  |
| 4      | 29.757        | MM   | 1.3841      | 3183.27539 | 38.33161 | 38.33161     | 39.8659 |

Totals : 7984.95251 185.40893

Instrument 1 3/6/2012 8:09:54 PM thl

Page 1 of 2

Data File D:\LC\201201\DXQ\DXQ-13-137\DXQ-13-137B 2012-03-02 11-06-58\085-0101.D  
 Sample Name: dxq-13-137b

```

=====
Acq. Operator   : THL                               Seq. Line :    1
Acq. Instrument : Instrument 1                       Location  : Vial 85
Injection Date  : 3/2/2012 11:18:33 AM              Inj       :    1
Acq. Method     : D:\LC\201201\DXQ\DXQ-13-137\DXQ-13-137B 2012-03-02 11-06-58\ASH-10-90-1ML-
                254NM-60MIN.M
Last changed    : 3/2/2012 11:34:22 AM by THL
                (modified after loading)
Analysis Method : D:\LC\201201\DXQ\DXQ-13-137\DXQ-13-137B 2012-03-02 11-06-58\085-0101.D\DA.
                M (ASH-10-90-1ML-254NM-60MIN.M)
Last changed    : 3/6/2012 8:15:35 PM by thl
                (modified after loading)
    
```

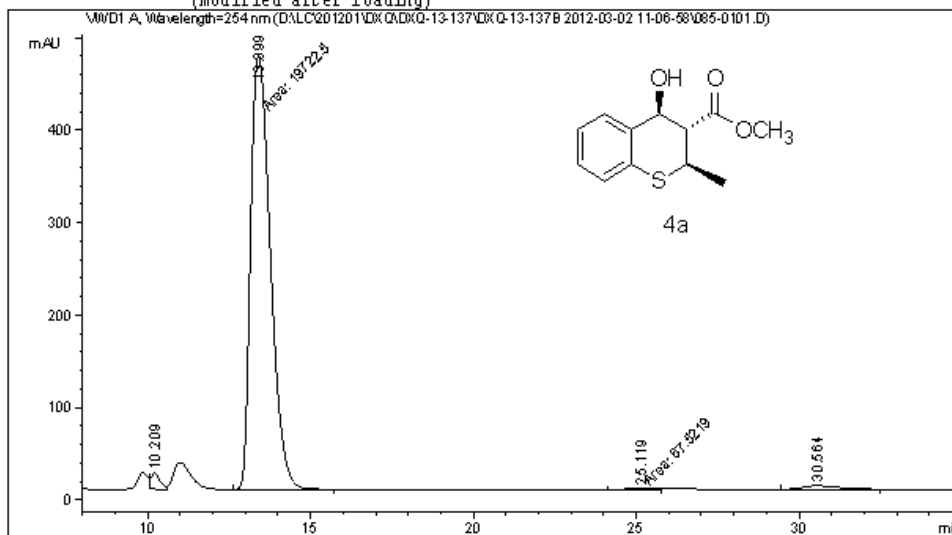

=====  
 Area Percent Report  
 =====

```

Sorted By      :      Signal
Multiplier     :      1.0000
Dilution       :      1.0000
Use Multiplier & Dilution Factor with ISTDs
    
```

Signal 1: VWD1 A, Wavelength=254 nm

| Peak #   | RetTime [min] | Type | Width [min] | Area mAU *s | Height [mAU] | Area %  |
|----------|---------------|------|-------------|-------------|--------------|---------|
| 1        | 10.209        | W    | 0.2794      | 336.21255   | 17.17018     | 1.6458  |
| 2        | 13.399        | MM   | 0.7016      | 1.97225e4   | 468.49265    | 96.5454 |
| 3        | 25.119        | MM   | 0.9260      | 67.52194    | 1.21532      | 0.3305  |
| 4        | 30.564        | BB   | 0.9068      | 301.98615   | 3.96818      | 1.4783  |
| Totals : |               |      |             | 2.04282e4   | 490.84632    |         |

Instrument 1 3/6/2012 8:15:43 PM thl

Page 1 of 2
